# Supplementary material
Source: publisher figshare collection journal article supplement (https://acs.figshare.com/ndownloader/files/4171180)
Supplement: Supplementary file 1 [file 4171180]

CRYST1 90.417 86.630 93.282 90.00 90.00 90.00 P 1 1   
ATOM      1  FE  hem     9      62.152  47.915  30.198
ATOM      2  NA  hem     9      60.313  47.092  30.720
ATOM      3  C1A hem     9      59.393  46.490  29.856
ATOM      4  C2A hem     9      58.365  45.732  30.638
ATOM      5  CAA hem     9      57.189  44.897  30.150
ATOM      6 HP71 hem     9      56.979  45.107  29.101
ATOM      7 HP72 hem     9      56.233  45.133  30.616
ATOM      8  CBA hem     9      57.475  43.350  30.274
ATOM      9 HP73 hem     9      57.505  43.216  31.355
ATOM     10 HP74 hem     9      58.398  43.024  29.795
ATOM     11  CGA hem     9      56.374  42.468  29.641
ATOM     12  O1A hem     9      56.188  41.368  30.184
ATOM     13  O2A hem     9      55.560  42.926  28.777
ATOM     14  C3A hem     9      58.539  46.163  31.900
ATOM     15  CMA hem     9      57.642  45.854  33.045
ATOM     16 HM81 hem     9      58.020  45.261  33.879
ATOM     17 HM82 hem     9      57.329  46.772  33.542
ATOM     18 HM83 hem     9      56.744  45.332  32.720
ATOM     19  C4A hem     9      59.805  46.975  31.957
ATOM     20  CHB hem     9      60.252  47.563  33.083
ATOM     21  HDM hem     9      59.615  47.565  33.967
ATOM     22  C1B hem     9      61.268  48.464  33.154
ATOM     23  NB  hem     9      62.123  48.730  32.100
ATOM     24  C2B hem     9      61.764  49.157  34.324
ATOM     25  CMB hem     9      61.199  48.898  35.651
ATOM     26 HM11 hem     9      60.146  49.175  35.665
ATOM     27 HM12 hem     9      61.418  47.892  36.005
ATOM     28 HM13 hem     9      61.805  49.557  36.273
ATOM     29  C3B hem     9      62.824  49.952  33.989
ATOM     30  CAB hem     9      63.769  50.640  34.885
ATOM     31  HV2 hem     9      63.769  51.720  34.863
ATOM     32  CBB hem     9      64.393  49.937  35.837
ATOM     33 HVC2 hem     9      64.264  48.869  35.943
ATOM     34 HVT2 hem     9      64.968  50.466  36.583
ATOM     35  C4B hem     9      63.009  49.700  32.604
ATOM     36  CHC hem     9      64.137  50.159  31.877
ATOM     37  HAM hem     9      64.798  50.881  32.356
ATOM     38  C1C hem     9      64.482  49.875  30.553
ATOM     39  NC  hem     9      63.658  49.196  29.695
ATOM     40  C2C hem     9      65.507  50.460  29.770
ATOM     41  CMC hem     9      66.623  51.300  30.335
ATOM     42 HM31 hem     9      67.041  50.834  31.227
ATOM     43 HM32 hem     9      67.490  51.475  29.698
ATOM     44 HM33 hem     9      66.241  52.284  30.607
ATOM     45  C3C hem     9      65.321  50.201  28.458
ATOM     46  CAC hem     9      66.093  50.598  27.205
ATOM     47  HV4 hem     9      65.811  51.612  26.962
ATOM     48  CBC hem     9      66.883  49.782  26.524
ATOM     49 HVC4 hem     9      67.000  48.742  26.789
ATOM     50 HVT4 hem     9      67.420  50.276  25.728
ATOM     51  C4C hem     9      64.178  49.394  28.406
ATOM     52  CHD hem     9      63.744  48.740  27.253
ATOM     53  HBM hem     9      64.201  49.108  26.334
ATOM     54  C1D hem     9      62.706  47.811  27.148
ATOM     55  ND  hem     9      61.913  47.358  28.268
ATOM     56  C2D hem     9      62.177  47.152  25.930
ATOM     57  CMD hem     9      62.824  47.229  24.586
ATOM     58 HM51 hem     9      62.328  48.028  24.035
ATOM     59 HM52 hem     9      63.911  47.298  24.626
ATOM     60 HM53 hem     9      62.757  46.306  24.009
ATOM     61  C3D hem     9      60.943  46.514  26.245
ATOM     62  C4D hem     9      60.783  46.711  27.734
ATOM     63  CHA hem     9      59.703  46.257  28.464
ATOM     64  HGM hem     9      59.020  45.574  27.958
ATOM     65  CAD hem     9      60.182  45.635  25.342
ATOM     66 HP61 hem     9      60.561  45.726  24.324
ATOM     67 HP62 hem     9      59.180  46.046  25.464
ATOM     68  CBD hem     9      60.333  44.154  25.697
ATOM     69 HP63 hem     9      60.136  43.998  26.757
ATOM     70 HP64 hem     9      61.338  43.831  25.425
ATOM     71  CGD hem     9      59.542  43.108  25.070
ATOM     72  O1D hem     9      58.923  43.360  24.001
ATOM     73  O2D hem     9      59.335  41.977  25.634
ATOM     74  C   hem     9      60.990  49.161  29.862
ATOM     75  O   hem     9      60.353  49.962  29.400
ATOM     76  N   ASN    10      38.205  63.129  32.271
ATOM     77  H1  ASN    10      37.600  63.674  32.869
ATOM     78  H2  ASN    10      38.573  63.902  31.736
ATOM     79  H3  ASN    10      38.976  62.699  32.761
ATOM     80  CA  ASN    10      37.443  62.244  31.337
ATOM     81  HA  ASN    10      36.705  62.889  30.860
ATOM     82  CB  ASN    10      38.281  61.770  30.198
ATOM     83  HB2 ASN    10      38.740  62.637  29.723
ATOM     84  HB3 ASN    10      39.058  61.102  30.569
ATOM     85  CG  ASN    10      37.461  60.947  29.193
ATOM     86  OD1 ASN    10      36.194  60.828  29.250
ATOM     87  ND2 ASN    10      38.196  60.388  28.232
ATOM     88 HD21 ASN    10      37.776  60.160  27.342
ATOM     89 HD22 ASN    10      39.165  60.669  28.249
ATOM     90  C   ASN    10      36.654  61.172  32.024
ATOM     91  O   ASN    10      37.169  60.145  32.438
ATOM     92  N   LEU    11      35.334  61.235  32.082
ATOM     93  H   LEU    11      34.757  62.030  31.850
ATOM     94  CA  LEU    11      34.432  60.218  32.792
ATOM     95  HA  LEU    11      35.013  59.336  33.061
ATOM     96  CB  LEU    11      33.930  60.793  34.187
ATOM     97  HB2 LEU    11      34.693  61.376  34.704
ATOM     98  HB3 LEU    11      33.167  61.541  33.973
ATOM     99  CG  LEU    11      33.236  59.811  35.131
ATOM    100  HG  LEU    11      32.578  59.221  34.494
ATOM    101  CD1 LEU    11      34.367  58.949  35.725
ATOM    102 HD11 LEU    11      34.017  58.024  36.185
ATOM    103 HD12 LEU    11      35.114  58.654  34.987
ATOM    104 HD13 LEU    11      34.996  59.586  36.346
ATOM    105  CD2 LEU    11      32.400  60.444  36.228
ATOM    106 HD21 LEU    11      32.071  59.776  37.023
ATOM    107 HD22 LEU    11      33.068  61.202  36.638
ATOM    108 HD23 LEU    11      31.480  60.850  35.809
ATOM    109  C   LEU    11      33.306  59.736  31.957
ATOM    110  O   LEU    11      32.717  60.384  31.067
ATOM    111  N   ALA    12      33.063  58.453  32.030
ATOM    112  H   ALA    12      33.706  57.992  32.658
ATOM    113  CA  ALA    12      32.119  57.755  31.076
ATOM    114  HA  ALA    12      31.731  58.472  30.352
ATOM    115  CB  ALA    12      32.903  56.710  30.261
ATOM    116  HB1 ALA    12      33.490  57.246  29.515
ATOM    117  HB2 ALA    12      33.416  56.039  30.948
ATOM    118  HB3 ALA    12      32.163  56.091  29.752
ATOM    119  C   ALA    12      30.957  57.095  31.776
ATOM    120  O   ALA    12      31.111  56.625  32.893
ATOM    121  N   PRO    13      29.782  56.911  31.133
ATOM    122  CD  PRO    13      29.568  57.210  29.718
ATOM    123  HD2 PRO    13      30.252  56.673  29.061
ATOM    124  HD3 PRO    13      29.662  58.265  29.462
ATOM    125  CG  PRO    13      28.118  56.757  29.446
ATOM    126  HG2 PRO    13      28.176  55.757  29.018
ATOM    127  HG3 PRO    13      27.508  57.455  28.872
ATOM    128  CB  PRO    13      27.466  56.574  30.760
ATOM    129  HB2 PRO    13      26.760  55.750  30.666
ATOM    130  HB3 PRO    13      26.875  57.456  31.006
ATOM    131  CA  PRO    13      28.644  56.253  31.732
ATOM    132  HA  PRO    13      28.411  56.658  32.716
ATOM    133  C   PRO    13      28.880  54.703  31.715
ATOM    134  O   PRO    13      29.794  54.260  31.010
ATOM    135  N   LEU    14      28.152  53.965  32.525
ATOM    136  H   LEU    14      27.393  54.410  33.021
ATOM    137  CA  LEU    14      28.551  52.586  32.879
ATOM    138  HA  LEU    14      29.632  52.577  33.016
ATOM    139  CB  LEU    14      27.934  52.212  34.240
ATOM    140  HB2 LEU    14      28.203  53.014  34.928
ATOM    141  HB3 LEU    14      26.848  52.127  34.188
ATOM    142  CG  LEU    14      28.387  50.828  34.627
ATOM    143  HG  LEU    14      28.467  50.142  33.784
ATOM    144  CD1 LEU    14      29.822  50.781  35.156
ATOM    145 HD11 LEU    14      30.529  50.976  34.351
ATOM    146 HD12 LEU    14      30.014  51.567  35.887
ATOM    147 HD13 LEU    14      30.107  49.792  35.516
ATOM    148  CD2 LEU    14      27.486  50.249  35.751
ATOM    149 HD21 LEU    14      27.547  49.173  35.913
ATOM    150 HD22 LEU    14      27.651  50.811  36.670
ATOM    151 HD23 LEU    14      26.423  50.397  35.558
ATOM    152  C   LEU    14      28.016  51.666  31.778
ATOM    153  O   LEU    14      26.877  51.827  31.426
ATOM    154  N   PRO    15      28.840  50.702  31.216
ATOM    155  CD  PRO    15      30.337  50.626  31.418
ATOM    156  HD2 PRO    15      30.548  49.843  32.146
ATOM    157  HD3 PRO    15      30.815  51.582  31.634
ATOM    158  CG  PRO    15      30.801  50.061  30.068
ATOM    159  HG2 PRO    15      31.602  49.327  30.149
ATOM    160  HG3 PRO    15      31.034  50.918  29.436
ATOM    161  CB  PRO    15      29.592  49.253  29.526
ATOM    162  HB2 PRO    15      29.731  48.173  29.590
ATOM    163  HB3 PRO    15      29.544  49.399  28.447
ATOM    164  CA  PRO    15      28.377  49.775  30.194
ATOM    165  HA  PRO    15      27.700  50.231  29.473
ATOM    166  C   PRO    15      27.625  48.648  30.992
ATOM    167  O   PRO    15      28.179  47.939  31.879
ATOM    168  N   PRO    16      26.322  48.508  30.792
ATOM    169  CD  PRO    16      25.455  48.916  29.651
ATOM    170  HD2 PRO    16      25.963  48.530  28.767
ATOM    171  HD3 PRO    16      25.306  49.993  29.582
ATOM    172  CG  PRO    16      24.061  48.183  29.814
ATOM    173  HG2 PRO    16      24.063  47.200  29.344
ATOM    174  HG3 PRO    16      23.159  48.722  29.523
ATOM    175  CB  PRO    16      24.072  47.957  31.339
ATOM    176  HB2 PRO    16      23.429  47.125  31.621
ATOM    177  HB3 PRO    16      23.721  48.873  31.814
ATOM    178  CA  PRO    16      25.538  47.643  31.723
ATOM    179  HA  PRO    16      25.641  47.849  32.789
ATOM    180  C   PRO    16      25.840  46.093  31.627
ATOM    181  O   PRO    16      25.292  45.316  32.386
ATOM    182  N   HIE    17      26.732  45.720  30.738
ATOM    183  H   HIE    17      26.954  46.268  29.920
ATOM    184  CA  HIE    17      27.293  44.321  30.819
ATOM    185  HA  HIE    17      26.425  43.719  31.085
ATOM    186  CB  HIE    17      27.966  43.906  29.495
ATOM    187  HB2 HIE    17      28.024  42.819  29.434
ATOM    188  HB3 HIE    17      27.285  44.187  28.692
ATOM    189  CG  HIE    17      29.288  44.538  29.175
ATOM    190  ND1 HIE    17      29.503  45.532  28.265
ATOM    191  CE1 HIE    17      30.777  45.791  28.161
ATOM    192  HE1 HIE    17      31.249  46.369  27.380
ATOM    193  NE2 HIE    17      31.446  44.813  28.889
ATOM    194  HE2 HIE    17      32.433  44.617  28.807
ATOM    195  CD2 HIE    17      30.512  44.052  29.624
ATOM    196  HD2 HIE    17      30.720  43.164  30.202
ATOM    197  C   HIE    17      28.244  44.135  32.027
ATOM    198  O   HIE    17      28.111  43.129  32.762
ATOM    199  N   VAL    18      28.912  45.211  32.496
ATOM    200  H   VAL    18      28.802  46.068  31.975
ATOM    201  CA  VAL    18      29.505  45.290  33.874
ATOM    202  HA  VAL    18      30.020  44.338  34.006
ATOM    203  CB  VAL    18      30.505  46.482  34.042
ATOM    204  HB  VAL    18      29.866  47.363  34.104
ATOM    205  CG1 VAL    18      31.223  46.389  35.366
ATOM    206 HG11 VAL    18      32.010  47.139  35.436
ATOM    207 HG12 VAL    18      30.530  46.651  36.166
ATOM    208 HG13 VAL    18      31.642  45.408  35.589
ATOM    209  CG2 VAL    18      31.468  46.468  32.870
ATOM    210 HG21 VAL    18      32.248  47.161  33.182
ATOM    211 HG22 VAL    18      31.845  45.472  32.638
ATOM    212 HG23 VAL    18      31.010  46.804  31.938
ATOM    213  C   VAL    18      28.378  45.370  34.971
ATOM    214  O   VAL    18      27.531  46.269  34.876
ATOM    215  N   PRO    19      28.420  44.509  36.000
ATOM    216  CD  PRO    19      29.123  43.171  36.011
ATOM    217  HD2 PRO    19      30.207  43.226  35.923
ATOM    218  HD3 PRO    19      28.714  42.510  35.247
ATOM    219  CG  PRO    19      28.724  42.469  37.286
ATOM    220  HG2 PRO    19      29.495  42.636  38.039
ATOM    221  HG3 PRO    19      28.585  41.389  37.266
ATOM    222  CB  PRO    19      27.429  43.108  37.645
ATOM    223  HB2 PRO    19      27.193  43.213  38.704
ATOM    224  HB3 PRO    19      26.579  42.639  37.148
ATOM    225  CA  PRO    19      27.623  44.561  37.190
ATOM    226  HA  PRO    19      26.710  45.096  36.931
ATOM    227  C   PRO    19      28.355  45.451  38.143
ATOM    228  O   PRO    19      29.567  45.429  38.293
ATOM    229  N   GLU    20      27.604  46.367  38.832
ATOM    230  H   GLU    20      26.608  46.259  38.697
ATOM    231  CA  GLU    20      28.157  47.579  39.506
ATOM    232  HA  GLU    20      28.826  48.023  38.768
ATOM    233  CB  GLU    20      26.965  48.462  39.957
ATOM    234  HB2 GLU    20      26.177  48.383  39.208
ATOM    235  HB3 GLU    20      26.582  48.235  40.952
ATOM    236  CG  GLU    20      27.420  49.888  40.046
ATOM    237  HG2 GLU    20      28.249  50.012  40.741
ATOM    238  HG3 GLU    20      27.823  50.249  39.100
ATOM    239  CD  GLU    20      26.396  50.818  40.601
ATOM    240  OE1 GLU    20      25.744  51.594  39.843
ATOM    241  OE2 GLU    20      26.225  50.971  41.825
ATOM    242  C   GLU    20      29.090  47.217  40.694
ATOM    243  O   GLU    20      30.005  47.983  40.973
ATOM    244  N   HIE    21      28.842  46.147  41.455
ATOM    245  H   HIE    21      28.020  45.642  41.159
ATOM    246  CA  HIE    21      29.568  45.918  42.724
ATOM    247  HA  HIE    21      29.444  46.678  43.495
ATOM    248  CB  HIE    21      29.143  44.503  43.305
ATOM    249  HB2 HIE    21      29.680  44.245  44.218
ATOM    250  HB3 HIE    21      28.075  44.700  43.391
ATOM    251  CG  HIE    21      29.395  43.276  42.457
ATOM    252  ND1 HIE    21      30.442  42.369  42.720
ATOM    253  CE1 HIE    21      30.455  41.466  41.702
ATOM    254  HE1 HIE    21      31.061  40.582  41.573
ATOM    255  NE2 HIE    21      29.576  41.879  40.782
ATOM    256  HE2 HIE    21      29.405  41.372  39.926
ATOM    257  CD2 HIE    21      28.886  42.998  41.241
ATOM    258  HD2 HIE    21      28.091  43.586  40.808
ATOM    259  C   HIE    21      31.158  45.955  42.489
ATOM    260  O   HIE    21      31.838  46.393  43.373
ATOM    261  N   LEU    22      31.589  45.750  41.297
ATOM    262  H   LEU    22      30.919  45.541  40.571
ATOM    263  CA  LEU    22      32.993  45.857  40.876
ATOM    264  HA  LEU    22      33.625  45.439  41.660
ATOM    265  CB  LEU    22      33.080  45.141  39.439
ATOM    266  HB2 LEU    22      32.393  45.685  38.791
ATOM    267  HB3 LEU    22      34.092  45.134  39.032
ATOM    268  CG  LEU    22      32.538  43.691  39.552
ATOM    269  HG  LEU    22      31.504  43.629  39.891
ATOM    270  CD1 LEU    22      32.468  43.127  38.124
ATOM    271 HD11 LEU    22      31.955  43.815  37.452
ATOM    272 HD12 LEU    22      33.499  42.981  37.801
ATOM    273 HD13 LEU    22      31.811  42.259  38.081
ATOM    274  CD2 LEU    22      33.360  42.872  40.555
ATOM    275 HD21 LEU    22      33.015  43.118  41.559
ATOM    276 HD22 LEU    22      33.163  41.805  40.455
ATOM    277 HD23 LEU    22      34.425  43.104  40.537
ATOM    278  C   LEU    22      33.501  47.256  40.742
ATOM    279  O   LEU    22      34.743  47.495  40.799
ATOM    280  N   VAL    23      32.615  48.225  40.386
ATOM    281  H   VAL    23      31.643  47.960  40.309
ATOM    282  CA  VAL    23      33.021  49.541  39.950
ATOM    283  HA  VAL    23      33.674  49.261  39.122
ATOM    284  CB  VAL    23      31.842  50.393  39.425
ATOM    285  HB  VAL    23      31.054  50.432  40.177
ATOM    286  CG1 VAL    23      32.323  51.857  39.097
ATOM    287 HG11 VAL    23      32.295  52.423  40.028
ATOM    288 HG12 VAL    23      33.243  51.890  38.514
ATOM    289 HG13 VAL    23      31.508  52.206  38.464
ATOM    290  CG2 VAL    23      31.302  49.713  38.170
ATOM    291 HG21 VAL    23      32.041  49.558  37.383
ATOM    292 HG22 VAL    23      30.860  48.735  38.360
ATOM    293 HG23 VAL    23      30.491  50.366  37.847
ATOM    294  C   VAL    23      33.869  50.335  41.025
ATOM    295  O   VAL    23      33.413  50.285  42.167
ATOM    296  N   PHE    24      34.957  50.997  40.651
ATOM    297  H   PHE    24      35.152  51.029  39.661
ATOM    298  CA  PHE    24      35.797  51.840  41.516
ATOM    299  HA  PHE    24      35.263  52.228  42.385
ATOM    300  CB  PHE    24      37.046  51.006  41.926
ATOM    301  HB2 PHE    24      36.676  49.989  42.058
ATOM    302  HB3 PHE    24      37.708  50.993  41.060
ATOM    303  CG  PHE    24      37.723  51.446  43.181
ATOM    304  CD1 PHE    24      37.450  50.695  44.345
ATOM    305  HD1 PHE    24      36.773  49.866  44.197
ATOM    306  CE1 PHE    24      38.110  51.105  45.559
ATOM    307  HE1 PHE    24      37.824  50.627  46.484
ATOM    308  CZ  PHE    24      38.925  52.232  45.601
ATOM    309  HZ  PHE    24      39.244  52.613  46.560
ATOM    310  CE2 PHE    24      39.072  53.039  44.454
ATOM    311  HE2 PHE    24      39.694  53.910  44.605
ATOM    312  CD2 PHE    24      38.438  52.693  43.256
ATOM    313  HD2 PHE    24      38.505  53.296  42.363
ATOM    314  C   PHE    24      36.127  53.140  40.826
ATOM    315  O   PHE    24      36.554  53.105  39.660
ATOM    316  N   ASP    25      36.048  54.245  41.627
ATOM    317  H   ASP    25      35.746  54.149  42.586
ATOM    318  CA  ASP    25      36.558  55.559  41.228
ATOM    319  HA  ASP    25      36.349  55.549  40.159
ATOM    320  CB  ASP    25      35.833  56.643  41.947
ATOM    321  HB2 ASP    25      34.773  56.554  41.707
ATOM    322  HB3 ASP    25      35.842  56.510  43.029
ATOM    323  CG  ASP    25      36.204  58.096  41.515
ATOM    324  OD1 ASP    25      36.719  58.248  40.412
ATOM    325  OD2 ASP    25      36.000  59.052  42.284
ATOM    326  C   ASP    25      38.082  55.669  41.393
ATOM    327  O   ASP    25      38.575  55.713  42.520
ATOM    328  N   PHE    26      38.719  55.860  40.275
ATOM    329  H   PHE    26      38.186  55.605  39.457
ATOM    330  CA  PHE    26      40.224  55.993  40.154
ATOM    331  HA  PHE    26      40.711  56.757  40.760
ATOM    332  CB  PHE    26      40.858  54.637  40.594
ATOM    333  HB2 PHE    26      40.238  54.237  41.396
ATOM    334  HB3 PHE    26      40.729  53.826  39.877
ATOM    335  CG  PHE    26      42.254  54.654  40.940
ATOM    336  CD1 PHE    26      42.580  54.786  42.277
ATOM    337  HD1 PHE    26      41.761  54.857  42.977
ATOM    338  CE1 PHE    26      43.910  54.626  42.741
ATOM    339  HE1 PHE    26      44.266  54.608  43.761
ATOM    340  CZ  PHE    26      44.898  54.611  41.715
ATOM    341  HZ  PHE    26      45.945  54.599  41.984
ATOM    342  CE2 PHE    26      44.582  54.722  40.361
ATOM    343  HE2 PHE    26      45.381  54.882  39.652
ATOM    344  CD2 PHE    26      43.249  54.643  39.952
ATOM    345  HD2 PHE    26      43.100  54.653  38.882
ATOM    346  C   PHE    26      40.728  56.292  38.739
ATOM    347  O   PHE    26      40.355  55.556  37.800
ATOM    348  N   ASP    27      41.469  57.387  38.507
ATOM    349  H   ASP    27      41.737  57.994  39.269
ATOM    350  CA  ASP    27      42.178  57.693  37.271
ATOM    351  HA  ASP    27      41.724  57.068  36.501
ATOM    352  CB  ASP    27      41.900  59.210  36.968
ATOM    353  HB2 ASP    27      40.874  59.577  37.007
ATOM    354  HB3 ASP    27      42.374  59.767  37.775
ATOM    355  CG  ASP    27      42.415  59.696  35.586
ATOM    356  OD1 ASP    27      43.621  60.063  35.442
ATOM    357  OD2 ASP    27      41.583  59.772  34.660
ATOM    358  C   ASP    27      43.671  57.399  37.303
ATOM    359  O   ASP    27      44.326  57.677  38.307
ATOM    360  N   MET    28      44.263  56.775  36.252
ATOM    361  H   MET    28      43.540  56.450  35.625
ATOM    362  CA  MET    28      45.702  56.491  36.081
ATOM    363  HA  MET    28      46.106  55.890  36.895
ATOM    364  CB  MET    28      45.887  55.685  34.786
ATOM    365  HB2 MET    28      46.934  55.389  34.729
ATOM    366  HB3 MET    28      45.214  54.832  34.869
ATOM    367  CG  MET    28      45.651  56.444  33.489
ATOM    368  HG2 MET    28      44.636  56.842  33.514
ATOM    369  HG3 MET    28      46.222  57.372  33.468
ATOM    370  SD  MET    28      46.046  55.498  31.996
ATOM    371  CE  MET    28      44.542  55.691  31.059
ATOM    372  HE1 MET    28      44.210  56.682  30.753
ATOM    373  HE2 MET    28      44.754  55.110  30.161
ATOM    374  HE3 MET    28      43.777  55.252  31.700
ATOM    375  C   MET    28      46.672  57.648  36.093
ATOM    376  O   MET    28      47.815  57.559  36.533
ATOM    377  N   TYR    29      46.238  58.840  35.753
ATOM    378  H   TYR    29      45.265  58.918  35.497
ATOM    379  CA  TYR    29      47.027  60.058  35.858
ATOM    380  HA  TYR    29      48.080  59.837  36.035
ATOM    381  CB  TYR    29      46.885  60.866  34.567
ATOM    382  HB2 TYR    29      45.826  61.065  34.410
ATOM    383  HB3 TYR    29      47.298  61.873  34.643
ATOM    384  CG  TYR    29      47.527  60.248  33.422
ATOM    385  CD1 TYR    29      46.799  59.640  32.388
ATOM    386  HD1 TYR    29      45.721  59.622  32.460
ATOM    387  CE1 TYR    29      47.488  59.122  31.293
ATOM    388  HE1 TYR    29      47.008  58.518  30.537
ATOM    389  CZ  TYR    29      48.857  59.193  31.193
ATOM    390  OH  TYR    29      49.524  58.473  30.235
ATOM    391  HH  TYR    29      50.472  58.619  30.288
ATOM    392  CE2 TYR    29      49.610  59.776  32.186
ATOM    393  HE2 TYR    29      50.662  59.969  32.033
ATOM    394  CD2 TYR    29      48.951  60.336  33.257
ATOM    395  HD2 TYR    29      49.467  60.920  34.005
ATOM    396  C   TYR    29      46.760  60.953  37.094
ATOM    397  O   TYR    29      47.691  61.511  37.712
ATOM    398  N   ASN    30      45.487  60.790  37.634
ATOM    399  H   ASN    30      44.827  60.182  37.170
ATOM    400  CA  ASN    30      45.143  61.215  38.966
ATOM    401  HA  ASN    30      45.943  61.654  39.561
ATOM    402  CB  ASN    30      44.129  62.315  38.713
ATOM    403  HB2 ASN    30      44.577  62.968  37.963
ATOM    404  HB3 ASN    30      43.186  61.940  38.313
ATOM    405  CG  ASN    30      43.762  63.052  39.945
ATOM    406  OD1 ASN    30      44.401  63.023  40.956
ATOM    407  ND2 ASN    30      42.739  63.820  39.993
ATOM    408 HD21 ASN    30      42.545  64.378  40.812
ATOM    409 HD22 ASN    30      42.063  63.793  39.244
ATOM    410  C   ASN    30      44.591  60.155  40.020
ATOM    411  O   ASN    30      43.405  59.997  40.212
ATOM    412  N   PRO    31      45.571  59.428  40.588
ATOM    413  CD  PRO    31      46.986  59.426  40.335
ATOM    414  HD2 PRO    31      47.414  60.427  40.296
ATOM    415  HD3 PRO    31      47.161  58.879  39.409
ATOM    416  CG  PRO    31      47.661  58.620  41.412
ATOM    417  HG2 PRO    31      47.780  59.188  42.335
ATOM    418  HG3 PRO    31      48.529  58.089  41.022
ATOM    419  CB  PRO    31      46.600  57.515  41.573
ATOM    420  HB2 PRO    31      46.663  56.983  42.523
ATOM    421  HB3 PRO    31      46.700  56.781  40.773
ATOM    422  CA  PRO    31      45.324  58.301  41.495
ATOM    423  HA  PRO    31      44.533  57.701  41.043
ATOM    424  C   PRO    31      44.789  58.859  42.839
ATOM    425  O   PRO    31      44.370  60.060  42.992
ATOM    426  N   SER    32      44.696  58.165  43.954
ATOM    427  H   SER    32      45.078  57.237  44.072
ATOM    428  CA  SER    32      43.855  58.659  45.111
ATOM    429  HA  SER    32      42.881  58.911  44.694
ATOM    430  CB  SER    32      43.692  57.478  46.102
ATOM    431  HB2 SER    32      43.022  57.874  46.864
ATOM    432  HB3 SER    32      43.361  56.543  45.650
ATOM    433  OG  SER    32      44.831  56.993  46.750
ATOM    434  HG  SER    32      45.331  56.482  46.109
ATOM    435  C   SER    32      44.294  59.947  45.804
ATOM    436  O   SER    32      43.490  60.584  46.448
ATOM    437  N   ASN    33      45.506  60.399  45.567
ATOM    438  H   ASN    33      46.111  59.751  45.080
ATOM    439  CA  ASN    33      46.012  61.550  46.318
ATOM    440  HA  ASN    33      45.278  62.352  46.391
ATOM    441  CB  ASN    33      46.276  61.073  47.752
ATOM    442  HB2 ASN    33      45.358  60.725  48.225
ATOM    443  HB3 ASN    33      46.964  60.255  47.539
ATOM    444  CG  ASN    33      46.893  62.092  48.602
ATOM    445  OD1 ASN    33      46.829  63.273  48.399
ATOM    446  ND2 ASN    33      47.663  61.723  49.585
ATOM    447 HD21 ASN    33      48.062  62.406  50.212
ATOM    448 HD22 ASN    33      47.659  60.741  49.824
ATOM    449  C   ASN    33      47.336  62.061  45.778
ATOM    450  O   ASN    33      48.312  61.283  45.657
ATOM    451  N   LEU    34      47.389  63.338  45.225
ATOM    452  H   LEU    34      46.504  63.820  45.293
ATOM    453  CA  LEU    34      48.615  63.944  44.670
ATOM    454  HA  LEU    34      49.087  63.172  44.064
ATOM    455  CB  LEU    34      48.383  65.118  43.808
ATOM    456  HB2 LEU    34      47.618  65.733  44.280
ATOM    457  HB3 LEU    34      49.302  65.704  43.770
ATOM    458  CG  LEU    34      47.973  64.766  42.365
ATOM    459  HG  LEU    34      46.960  64.384  42.494
ATOM    460  CD1 LEU    34      47.867  66.039  41.513
ATOM    461 HD11 LEU    34      47.414  66.905  41.994
ATOM    462 HD12 LEU    34      48.846  66.299  41.112
ATOM    463 HD13 LEU    34      47.275  65.919  40.606
ATOM    464  CD2 LEU    34      48.829  63.795  41.640
ATOM    465 HD21 LEU    34      48.775  62.823  42.132
ATOM    466 HD22 LEU    34      48.483  63.635  40.618
ATOM    467 HD23 LEU    34      49.868  64.124  41.667
ATOM    468  C   LEU    34      49.737  64.237  45.692
ATOM    469  O   LEU    34      50.913  64.568  45.420
ATOM    470  N   SER    35      49.464  64.078  47.007
ATOM    471  H   SER    35      48.503  64.031  47.311
ATOM    472  CA  SER    35      50.483  64.315  48.105
ATOM    473  HA  SER    35      51.262  65.006  47.781
ATOM    474  CB  SER    35      49.773  65.042  49.254
ATOM    475  HB2 SER    35      49.048  64.339  49.664
ATOM    476  HB3 SER    35      50.569  65.354  49.930
ATOM    477  OG  SER    35      49.276  66.292  48.719
ATOM    478  HG  SER    35      48.510  66.259  48.140
ATOM    479  C   SER    35      51.242  63.033  48.551
ATOM    480  O   SER    35      52.190  63.105  49.395
ATOM    481  N   ALA    36      50.808  61.858  48.076
ATOM    482  H   ALA    36      50.053  61.905  47.406
ATOM    483  CA  ALA    36      51.489  60.545  48.335
ATOM    484  HA  ALA    36      52.105  60.562  49.235
ATOM    485  CB  ALA    36      50.384  59.490  48.616
ATOM    486  HB1 ALA    36      49.758  59.363  47.732
ATOM    487  HB2 ALA    36      50.858  58.511  48.698
ATOM    488  HB3 ALA    36      49.801  59.719  49.508
ATOM    489  C   ALA    36      52.409  60.107  47.185
ATOM    490  O   ALA    36      52.202  60.517  46.052
ATOM    491  N   GLY    37      53.215  59.063  47.551
ATOM    492  H   GLY    37      53.314  58.841  48.532
ATOM    493  CA  GLY    37      54.157  58.316  46.607
ATOM    494  HA2 GLY    37      54.723  58.980  45.953
ATOM    495  HA3 GLY    37      54.819  57.758  47.270
ATOM    496  C   GLY    37      53.321  57.331  45.734
ATOM    497  O   GLY    37      52.233  56.955  46.182
ATOM    498  N   VAL    38      53.695  57.125  44.504
ATOM    499  H   VAL    38      54.578  57.567  44.294
ATOM    500  CA  VAL    38      52.826  56.486  43.516
ATOM    501  HA  VAL    38      51.996  57.176  43.372
ATOM    502  CB  VAL    38      53.456  56.421  42.122
ATOM    503  HB  VAL    38      54.340  55.784  42.124
ATOM    504  CG1 VAL    38      52.452  55.843  41.114
ATOM    505 HG11 VAL    38      51.506  56.383  41.157
ATOM    506 HG12 VAL    38      52.826  56.067  40.114
ATOM    507 HG13 VAL    38      52.210  54.793  41.277
ATOM    508  CG2 VAL    38      53.967  57.818  41.711
ATOM    509 HG21 VAL    38      54.763  58.166  42.369
ATOM    510 HG22 VAL    38      54.306  57.807  40.675
ATOM    511 HG23 VAL    38      53.152  58.539  41.764
ATOM    512  C   VAL    38      52.318  55.140  43.999
ATOM    513  O   VAL    38      51.142  54.820  43.898
ATOM    514  N   GLN    39      53.116  54.359  44.721
ATOM    515  H   GLN    39      54.040  54.693  44.954
ATOM    516  CA  GLN    39      52.654  53.046  45.323
ATOM    517  HA  GLN    39      52.334  52.350  44.547
ATOM    518  CB  GLN    39      53.908  52.340  45.961
ATOM    519  HB2 GLN    39      54.793  52.595  45.377
ATOM    520  HB3 GLN    39      54.097  52.747  46.954
ATOM    521  CG  GLN    39      53.814  50.804  46.013
ATOM    522  HG2 GLN    39      53.991  50.505  47.046
ATOM    523  HG3 GLN    39      52.788  50.515  45.785
ATOM    524  CD  GLN    39      54.791  50.157  44.992
ATOM    525  OE1 GLN    39      55.182  50.657  43.927
ATOM    526  NE2 GLN    39      55.339  49.060  45.263
ATOM    527 HE21 GLN    39      56.097  48.711  44.692
ATOM    528 HE22 GLN    39      55.125  48.512  46.084
ATOM    529  C   GLN    39      51.509  53.407  46.369
ATOM    530  O   GLN    39      50.468  52.781  46.355
ATOM    531  N   GLU    40      51.755  54.416  47.250
ATOM    532  H   GLU    40      52.657  54.863  47.172
ATOM    533  CA  GLU    40      50.741  54.778  48.304
ATOM    534  HA  GLU    40      50.333  53.863  48.732
ATOM    535  CB  GLU    40      51.354  55.572  49.548
ATOM    536  HB2 GLU    40      51.549  56.625  49.345
ATOM    537  HB3 GLU    40      50.623  55.601  50.356
ATOM    538  CG  GLU    40      52.606  55.038  50.209
ATOM    539  HG2 GLU    40      52.578  55.735  51.046
ATOM    540  HG3 GLU    40      52.449  54.022  50.570
ATOM    541  CD  GLU    40      53.920  55.370  49.547
ATOM    542  OE1 GLU    40      54.174  54.979  48.365
ATOM    543  OE2 GLU    40      54.806  55.915  50.246
ATOM    544  C   GLU    40      49.536  55.586  47.769
ATOM    545  O   GLU    40      48.469  55.562  48.463
ATOM    546  N   ALA    41      49.632  56.218  46.554
ATOM    547  H   ALA    41      50.524  56.321  46.091
ATOM    548  CA  ALA    41      48.548  56.780  45.819
ATOM    549  HA  ALA    41      47.863  57.248  46.526
ATOM    550  CB  ALA    41      49.182  57.711  44.744
ATOM    551  HB1 ALA    41      48.408  58.415  44.437
ATOM    552  HB2 ALA    41      50.014  58.274  45.163
ATOM    553  HB3 ALA    41      49.553  57.119  43.906
ATOM    554  C   ALA    41      47.629  55.730  45.155
ATOM    555  O   ALA    41      46.438  55.985  45.004
ATOM    556  N   TRP    42      48.142  54.569  44.694
ATOM    557  H   TRP    42      49.117  54.355  44.846
ATOM    558  CA  TRP    42      47.267  53.514  44.112
ATOM    559  HA  TRP    42      46.310  53.886  43.746
ATOM    560  CB  TRP    42      48.019  52.932  42.887
ATOM    561  HB2 TRP    42      49.048  52.728  43.185
ATOM    562  HB3 TRP    42      47.578  51.965  42.644
ATOM    563  CG  TRP    42      48.222  53.736  41.582
ATOM    564  CD1 TRP    42      48.987  54.834  41.473
ATOM    565  HD1 TRP    42      49.468  55.273  42.335
ATOM    566  NE1 TRP    42      49.099  55.187  40.162
ATOM    567  HE1 TRP    42      49.545  56.041  39.858
ATOM    568  CE2 TRP    42      48.298  54.383  39.324
ATOM    569  CZ2 TRP    42      47.987  54.438  37.959
ATOM    570  HZ2 TRP    42      48.560  55.089  37.315
ATOM    571  CH2 TRP    42      47.064  53.476  37.485
ATOM    572  HH2 TRP    42      46.862  53.403  36.427
ATOM    573  CZ3 TRP    42      46.601  52.460  38.292
ATOM    574  HZ3 TRP    42      45.889  51.744  37.910
ATOM    575  CE3 TRP    42      47.063  52.320  39.618
ATOM    576  HE3 TRP    42      46.813  51.437  40.188
ATOM    577  CD2 TRP    42      47.757  53.381  40.222
ATOM    578  C   TRP    42      46.873  52.435  45.146
ATOM    579  O   TRP    42      45.955  51.672  44.937
ATOM    580  N   ALA    43      47.468  52.409  46.307
ATOM    581  H   ALA    43      48.247  53.031  46.478
ATOM    582  CA  ALA    43      47.162  51.362  47.303
ATOM    583  HA  ALA    43      47.584  50.403  47.003
ATOM    584  CB  ALA    43      48.072  51.669  48.510
ATOM    585  HB1 ALA    43      47.965  52.638  48.999
ATOM    586  HB2 ALA    43      47.922  50.810  49.164
ATOM    587  HB3 ALA    43      49.153  51.651  48.368
ATOM    588  C   ALA    43      45.668  51.206  47.649
ATOM    589  O   ALA    43      45.349  50.005  47.898
ATOM    590  N   VAL    44      44.737  52.217  47.644
ATOM    591  H   VAL    44      45.001  53.188  47.556
ATOM    592  CA  VAL    44      43.309  52.109  47.932
ATOM    593  HA  VAL    44      43.138  51.920  48.992
ATOM    594  CB  VAL    44      42.536  53.400  47.680
ATOM    595  HB  VAL    44      41.463  53.212  47.635
ATOM    596  CG1 VAL    44      42.629  54.261  48.943
ATOM    597 HG11 VAL    44      41.981  55.134  48.873
ATOM    598 HG12 VAL    44      42.307  53.802  49.877
ATOM    599 HG13 VAL    44      43.658  54.528  49.184
ATOM    600  CG2 VAL    44      42.791  54.123  46.347
ATOM    601 HG21 VAL    44      42.769  53.473  45.472
ATOM    602 HG22 VAL    44      41.996  54.865  46.281
ATOM    603 HG23 VAL    44      43.788  54.556  46.278
ATOM    604  C   VAL    44      42.634  51.027  47.147
ATOM    605  O   VAL    44      41.473  50.682  47.455
ATOM    606  N   LEU    45      43.225  50.483  46.043
ATOM    607  H   LEU    45      44.105  50.848  45.708
ATOM    608  CA  LEU    45      42.637  49.410  45.217
ATOM    609  HA  LEU    45      41.557  49.555  45.205
ATOM    610  CB  LEU    45      43.171  49.514  43.815
ATOM    611  HB2 LEU    45      44.238  49.295  43.783
ATOM    612  HB3 LEU    45      42.782  48.680  43.230
ATOM    613  CG  LEU    45      42.868  50.823  43.062
ATOM    614  HG  LEU    45      43.059  51.693  43.689
ATOM    615  CD1 LEU    45      43.780  50.961  41.882
ATOM    616 HD11 LEU    45      43.642  50.118  41.205
ATOM    617 HD12 LEU    45      43.469  51.835  41.308
ATOM    618 HD13 LEU    45      44.837  51.060  42.126
ATOM    619  CD2 LEU    45      41.417  50.999  42.543
ATOM    620 HD21 LEU    45      40.960  50.120  42.088
ATOM    621 HD22 LEU    45      40.760  51.215  43.385
ATOM    622 HD23 LEU    45      41.465  51.863  41.881
ATOM    623  C   LEU    45      42.829  48.030  45.824
ATOM    624  O   LEU    45      42.407  47.089  45.214
ATOM    625  N   GLN    46      43.650  47.903  46.849
ATOM    626  H   GLN    46      44.234  48.702  47.049
ATOM    627  CA  GLN    46      43.894  46.688  47.542
ATOM    628  HA  GLN    46      43.400  45.900  46.973
ATOM    629  CB  GLN    46      45.389  46.395  47.603
ATOM    630  HB2 GLN    46      45.792  47.150  48.279
ATOM    631  HB3 GLN    46      45.518  45.433  48.100
ATOM    632  CG  GLN    46      46.033  46.382  46.187
ATOM    633  HG2 GLN    46      45.440  45.806  45.476
ATOM    634  HG3 GLN    46      46.176  47.405  45.838
ATOM    635  CD  GLN    46      47.436  45.753  46.258
ATOM    636  OE1 GLN    46      48.164  46.033  47.240
ATOM    637  NE2 GLN    46      47.814  44.895  45.290
ATOM    638 HE21 GLN    46      48.784  44.614  45.338
ATOM    639 HE22 GLN    46      47.331  44.892  44.404
ATOM    640  C   GLN    46      43.151  46.484  48.891
ATOM    641  O   GLN    46      43.580  45.494  49.570
ATOM    642  N   GLU    47      42.205  47.324  49.319
ATOM    643  H   GLU    47      41.999  48.148  48.773
ATOM    644  CA  GLU    47      41.419  47.027  50.503
ATOM    645  HA  GLU    47      42.178  46.920  51.278
ATOM    646  CB  GLU    47      40.525  48.256  50.846
ATOM    647  HB2 GLU    47      40.303  48.990  50.072
ATOM    648  HB3 GLU    47      39.540  47.965  51.211
ATOM    649  CG  GLU    47      41.192  49.085  51.912
ATOM    650  HG2 GLU    47      42.272  49.173  51.784
ATOM    651  HG3 GLU    47      40.773  50.091  51.939
ATOM    652  CD  GLU    47      40.861  48.445  53.229
ATOM    653  OE1 GLU    47      41.575  47.549  53.695
ATOM    654  OE2 GLU    47      39.846  48.707  53.846
ATOM    655  C   GLU    47      40.667  45.670  50.408
ATOM    656  O   GLU    47      40.307  45.198  49.266
ATOM    657  N   SER    48      40.445  45.086  51.593
ATOM    658  H   SER    48      40.702  45.585  52.432
ATOM    659  CA  SER    48      40.026  43.580  51.648
ATOM    660  HA  SER    48      40.675  42.999  50.993
ATOM    661  CB  SER    48      40.126  43.104  53.085
ATOM    662  HB2 SER    48      39.598  42.155  53.160
ATOM    663  HB3 SER    48      41.155  42.980  53.424
ATOM    664  OG  SER    48      39.434  44.037  53.892
ATOM    665  HG  SER    48      38.571  43.719  54.167
ATOM    666  C   SER    48      38.648  43.205  51.118
ATOM    667  O   SER    48      38.330  42.017  50.961
ATOM    668  N   ASN    49      37.796  44.208  50.816
ATOM    669  H   ASN    49      38.070  45.153  51.043
ATOM    670  CA  ASN    49      36.518  44.060  50.139
ATOM    671  HA  ASN    49      36.086  43.070  50.286
ATOM    672  CB  ASN    49      35.579  45.186  50.515
ATOM    673  HB2 ASN    49      34.587  44.959  50.123
ATOM    674  HB3 ASN    49      35.410  45.229  51.591
ATOM    675  CG  ASN    49      35.929  46.602  50.077
ATOM    676  OD1 ASN    49      35.466  47.108  49.092
ATOM    677  ND2 ASN    49      36.914  47.205  50.702
ATOM    678 HD21 ASN    49      37.169  48.156  50.475
ATOM    679 HD22 ASN    49      37.256  46.685  51.498
ATOM    680  C   ASN    49      36.759  44.092  48.585
ATOM    681  O   ASN    49      35.794  43.832  47.895
ATOM    682  N   VAL    50      37.849  44.624  48.029
ATOM    683  H   VAL    50      38.674  44.711  48.604
ATOM    684  CA  VAL    50      37.916  45.043  46.608
ATOM    685  HA  VAL    50      36.949  45.406  46.260
ATOM    686  CB  VAL    50      38.964  46.060  46.322
ATOM    687  HB  VAL    50      39.982  45.686  46.439
ATOM    688  CG1 VAL    50      38.863  46.586  44.870
ATOM    689 HG11 VAL    50      37.812  46.715  44.608
ATOM    690 HG12 VAL    50      39.373  47.537  44.721
ATOM    691 HG13 VAL    50      39.269  45.822  44.207
ATOM    692  CG2 VAL    50      38.877  47.332  47.216
ATOM    693 HG21 VAL    50      39.132  46.948  48.204
ATOM    694 HG22 VAL    50      39.588  48.104  46.922
ATOM    695 HG23 VAL    50      37.883  47.777  47.185
ATOM    696  C   VAL    50      38.131  43.819  45.787
ATOM    697  O   VAL    50      39.139  43.132  46.052
ATOM    698  N   PRO    51      37.449  43.481  44.715
ATOM    699  CD  PRO    51      36.065  43.901  44.396
ATOM    700  HD2 PRO    51      36.178  44.858  43.888
ATOM    701  HD3 PRO    51      35.487  43.919  45.320
ATOM    702  CG  PRO    51      35.510  42.833  43.501
ATOM    703  HG2 PRO    51      34.793  43.342  42.858
ATOM    704  HG3 PRO    51      35.068  42.049  44.118
ATOM    705  CB  PRO    51      36.718  42.385  42.755
ATOM    706  HB2 PRO    51      37.013  43.014  41.916
ATOM    707  HB3 PRO    51      36.603  41.358  42.407
ATOM    708  CA  PRO    51      37.830  42.371  43.829
ATOM    709  HA  PRO    51      37.727  41.447  44.397
ATOM    710  C   PRO    51      39.287  42.450  43.216
ATOM    711  O   PRO    51      40.017  43.429  43.454
ATOM    712  N   ASP    52      39.722  41.385  42.500
ATOM    713  H   ASP    52      39.110  40.592  42.362
ATOM    714  CA  ASP    52      41.060  41.258  41.846
ATOM    715  HA  ASP    52      41.871  41.586  42.497
ATOM    716  CB  ASP    52      41.225  39.789  41.517
ATOM    717  HB2 ASP    52      40.405  39.537  40.844
ATOM    718  HB3 ASP    52      42.100  39.683  40.875
ATOM    719  CG  ASP    52      41.487  38.695  42.570
ATOM    720  OD1 ASP    52      41.755  37.570  42.114
ATOM    721  OD2 ASP    52      41.366  39.010  43.758
ATOM    722  C   ASP    52      41.157  42.219  40.580
ATOM    723  O   ASP    52      42.232  42.473  40.001
ATOM    724  N   LEU    53      40.072  42.776  40.214
ATOM    725  H   LEU    53      39.175  42.617  40.649
ATOM    726  CA  LEU    53      40.004  43.639  39.044
ATOM    727  HA  LEU    53      40.861  44.306  39.137
ATOM    728  CB  LEU    53      39.985  42.882  37.674
ATOM    729  HB2 LEU    53      39.883  43.640  36.899
ATOM    730  HB3 LEU    53      40.945  42.380  37.554
ATOM    731  CG  LEU    53      38.965  41.766  37.362
ATOM    732  HG  LEU    53      37.931  42.108  37.328
ATOM    733  CD1 LEU    53      39.150  41.152  35.979
ATOM    734 HD11 LEU    53      38.532  40.260  35.877
ATOM    735 HD12 LEU    53      38.870  41.946  35.287
ATOM    736 HD13 LEU    53      40.183  40.820  35.877
ATOM    737  CD2 LEU    53      39.139  40.590  38.419
ATOM    738 HD21 LEU    53      38.791  39.657  37.978
ATOM    739 HD22 LEU    53      40.188  40.397  38.646
ATOM    740 HD23 LEU    53      38.646  40.748  39.378
ATOM    741  C   LEU    53      38.778  44.530  39.173
ATOM    742  O   LEU    53      37.777  44.114  39.726
ATOM    743  N   VAL    54      38.811  45.768  38.689
ATOM    744  H   VAL    54      39.647  45.975  38.163
ATOM    745  CA  VAL    54      37.826  46.783  38.737
ATOM    746  HA  VAL    54      36.856  46.371  39.018
ATOM    747  CB  VAL    54      38.006  47.972  39.783
ATOM    748  HB  VAL    54      37.133  48.621  39.719
ATOM    749  CG1 VAL    54      38.127  47.347  41.215
ATOM    750 HG11 VAL    54      37.253  46.818  41.594
ATOM    751 HG12 VAL    54      38.993  46.685  41.244
ATOM    752 HG13 VAL    54      38.362  48.218  41.826
ATOM    753  CG2 VAL    54      39.172  48.829  39.446
ATOM    754 HG21 VAL    54      39.302  49.670  40.126
ATOM    755 HG22 VAL    54      40.092  48.249  39.514
ATOM    756 HG23 VAL    54      38.990  49.184  38.431
ATOM    757  C   VAL    54      37.592  47.392  37.385
ATOM    758  O   VAL    54      38.510  47.509  36.606
ATOM    759  N   TRP    55      36.382  47.886  37.153
ATOM    760  H   TRP    55      35.719  47.816  37.912
ATOM    761  CA  TRP    55      36.075  48.867  36.147
ATOM    762  HA  TRP    55      36.847  48.834  35.378
ATOM    763  CB  TRP    55      34.697  48.470  35.536
ATOM    764  HB2 TRP    55      34.694  47.525  34.994
ATOM    765  HB3 TRP    55      33.952  48.367  36.325
ATOM    766  CG  TRP    55      34.299  49.529  34.528
ATOM    767  CD1 TRP    55      33.459  50.579  34.671
ATOM    768  HD1 TRP    55      32.960  50.808  35.600
ATOM    769  NE1 TRP    55      33.305  51.338  33.533
ATOM    770  HE1 TRP    55      32.641  52.084  33.374
ATOM    771  CE2 TRP    55      34.054  50.761  32.528
ATOM    772  CZ2 TRP    55      34.221  51.092  31.208
ATOM    773  HZ2 TRP    55      33.516  51.808  30.813
ATOM    774  CH2 TRP    55      34.999  50.308  30.354
ATOM    775  HH2 TRP    55      34.998  50.528  29.296
ATOM    776  CZ3 TRP    55      35.721  49.221  30.871
ATOM    777  HZ3 TRP    55      36.308  48.608  30.203
ATOM    778  CE3 TRP    55      35.670  48.965  32.294
ATOM    779  HE3 TRP    55      36.142  48.070  32.670
ATOM    780  CD2 TRP    55      34.762  49.705  33.160
ATOM    781  C   TRP    55      36.014  50.259  36.819
ATOM    782  O   TRP    55      35.204  50.459  37.693
ATOM    783  N   THR    56      36.832  51.146  36.266
ATOM    784  H   THR    56      37.367  50.645  35.570
ATOM    785  CA  THR    56      36.929  52.611  36.417
ATOM    786  HA  THR    56      36.401  52.928  37.316
ATOM    787  CB  THR    56      38.333  53.162  36.613
ATOM    788  HB  THR    56      38.846  52.822  37.513
ATOM    789  CG2 THR    56      39.278  53.147  35.411
ATOM    790 HG21 THR    56      38.943  53.761  34.575
ATOM    791 HG22 THR    56      40.244  53.516  35.756
ATOM    792 HG23 THR    56      39.552  52.206  34.934
ATOM    793  OG1 THR    56      38.136  54.509  36.737
ATOM    794  HG1 THR    56      38.966  54.752  37.156
ATOM    795  C   THR    56      36.218  53.215  35.166
ATOM    796  O   THR    56      36.487  52.915  33.999
ATOM    797  N   ARG    57      35.361  54.154  35.418
ATOM    798  H   ARG    57      35.154  54.362  36.384
ATOM    799  CA  ARG    57      34.608  54.975  34.399
ATOM    800  HA  ARG    57      34.442  54.320  33.545
ATOM    801  CB  ARG    57      33.248  55.434  34.992
ATOM    802  HB2 ARG    57      33.461  55.943  35.931
ATOM    803  HB3 ARG    57      32.782  56.195  34.365
ATOM    804  CG  ARG    57      32.269  54.326  35.267
ATOM    805  HG2 ARG    57      31.883  53.898  34.342
ATOM    806  HG3 ARG    57      32.708  53.457  35.758
ATOM    807  CD  ARG    57      31.135  54.822  36.121
ATOM    808  HD2 ARG    57      30.421  53.999  36.150
ATOM    809  HD3 ARG    57      31.403  55.051  37.153
ATOM    810  NE  ARG    57      30.597  56.074  35.493
ATOM    811  HE  ARG    57      31.026  56.295  34.606
ATOM    812  CZ  ARG    57      29.631  56.886  35.856
ATOM    813  NH1 ARG    57      28.967  56.711  36.964
ATOM    814 HH11 ARG    57      29.223  56.019  37.653
ATOM    815 HH12 ARG    57      28.350  57.454  37.260
ATOM    816  NH2 ARG    57      29.306  57.920  35.106
ATOM    817 HH21 ARG    57      29.708  58.034  34.186
ATOM    818 HH22 ARG    57      28.462  58.448  35.274
ATOM    819  C   ARG    57      35.492  56.179  33.982
ATOM    820  O   ARG    57      35.217  56.873  32.983
ATOM    821  N   CYS    58      36.593  56.402  34.669
ATOM    822  H   CYS    58      36.859  55.759  35.401
ATOM    823  CA  CYS    58      37.604  57.472  34.352
ATOM    824  HA  CYS    58      37.065  58.394  34.138
ATOM    825  CB  CYS    58      38.523  57.799  35.562
ATOM    826  HB2 CYS    58      39.037  56.880  35.847
ATOM    827  HB3 CYS    58      39.328  58.425  35.179
ATOM    828  SG  CYS    58      37.622  58.600  36.913
ATOM    829  HG  CYS    58      37.004  57.459  37.229
ATOM    830  C   CYS    58      38.434  57.223  33.107
ATOM    831  O   CYS    58      38.369  56.074  32.557
ATOM    832  N   ASN    59      39.062  58.259  32.500
ATOM    833  H   ASN    59      38.962  59.205  32.840
ATOM    834  CA  ASN    59      39.800  58.063  31.242
ATOM    835  HA  ASN    59      40.245  59.000  30.908
ATOM    836  CB  ASN    59      40.980  57.057  31.373
ATOM    837  HB2 ASN    59      40.595  56.119  31.771
ATOM    838  HB3 ASN    59      41.557  56.890  30.463
ATOM    839  CG  ASN    59      41.909  57.591  32.448
ATOM    840  OD1 ASN    59      42.063  56.994  33.497
ATOM    841  ND2 ASN    59      42.456  58.757  32.329
ATOM    842 HD21 ASN    59      42.746  59.104  33.233
ATOM    843 HD22 ASN    59      42.313  59.279  31.477
ATOM    844  C   ASN    59      38.909  57.578  30.032
ATOM    845  O   ASN    59      39.447  56.926  29.104
ATOM    846  N   GLY    60      37.598  57.813  30.041
ATOM    847  H   GLY    60      37.271  58.454  30.751
ATOM    848  CA  GLY    60      36.700  57.251  29.108
ATOM    849  HA2 GLY    60      35.920  57.974  28.869
ATOM    850  HA3 GLY    60      37.357  57.231  28.239
ATOM    851  C   GLY    60      36.213  55.764  29.329
ATOM    852  O   GLY    60      35.415  55.265  28.497
ATOM    853  N   GLY    61      36.687  55.152  30.416
ATOM    854  H   GLY    61      37.398  55.717  30.857
ATOM    855  CA  GLY    61      36.389  53.698  30.717
ATOM    856  HA2 GLY    61      36.034  53.712  31.747
ATOM    857  HA3 GLY    61      35.568  53.351  30.089
ATOM    858  C   GLY    61      37.586  52.764  30.451
ATOM    859  O   GLY    61      37.918  52.606  29.257
ATOM    860  N   HIE    62      37.979  52.014  31.388
ATOM    861  H   HIE    62      37.687  52.237  32.329
ATOM    862  CA  HIE    62      38.910  50.882  31.302
ATOM    863  HA  HIE    62      38.512  50.364  30.429
ATOM    864  CB  HIE    62      40.290  51.380  30.885
ATOM    865  HB2 HIE    62      40.847  50.456  30.731
ATOM    866  HB3 HIE    62      40.207  51.882  29.921
ATOM    867  CG  HIE    62      41.115  52.293  31.832
ATOM    868  ND1 HIE    62      42.454  51.980  32.288
ATOM    869  CE1 HIE    62      42.763  53.027  32.990
ATOM    870  HE1 HIE    62      43.825  53.160  33.133
ATOM    871  NE2 HIE    62      41.780  53.870  33.210
ATOM    872  HE2 HIE    62      41.864  54.790  33.620
ATOM    873  CD2 HIE    62      40.711  53.429  32.456
ATOM    874  HD2 HIE    62      39.764  53.923  32.299
ATOM    875  C   HIE    62      39.049  49.876  32.458
ATOM    876  O   HIE    62      38.969  50.275  33.633
ATOM    877  N   TRP    63      39.292  48.566  32.221
ATOM    878  H   TRP    63      39.327  48.294  31.249
ATOM    879  CA  TRP    63      39.492  47.595  33.288
ATOM    880  HA  TRP    63      38.749  47.885  34.032
ATOM    881  CB  TRP    63      39.312  46.159  32.666
ATOM    882  HB2 TRP    63      40.066  46.161  31.878
ATOM    883  HB3 TRP    63      39.648  45.461  33.433
ATOM    884  CG  TRP    63      37.968  45.809  32.152
ATOM    885  CD1 TRP    63      37.692  45.499  30.899
ATOM    886  HD1 TRP    63      38.370  45.544  30.061
ATOM    887  NE1 TRP    63      36.307  45.110  30.864
ATOM    888  HE1 TRP    63      35.736  44.886  30.061
ATOM    889  CE2 TRP    63      35.802  44.908  32.116
ATOM    890  CZ2 TRP    63      34.582  44.405  32.607
ATOM    891  HZ2 TRP    63      33.841  43.970  31.952
ATOM    892  CH2 TRP    63      34.289  44.568  33.955
ATOM    893  HH2 TRP    63      33.300  44.292  34.291
ATOM    894  CZ3 TRP    63      35.233  44.956  34.823
ATOM    895  HZ3 TRP    63      34.968  44.992  35.870
ATOM    896  CE3 TRP    63      36.501  45.363  34.316
ATOM    897  HE3 TRP    63      37.264  45.631  35.032
ATOM    898  CD2 TRP    63      36.810  45.421  32.948
ATOM    899  C   TRP    63      40.897  47.724  33.813
ATOM    900  O   TRP    63      41.886  47.801  33.121
ATOM    901  N   ILE    64      40.976  47.766  35.169
ATOM    902  H   ILE    64      40.061  47.689  35.588
ATOM    903  CA  ILE    64      42.176  47.604  35.972
ATOM    904  HA  ILE    64      42.958  47.527  35.216
ATOM    905  CB  ILE    64      42.488  48.812  36.928
ATOM    906  HB  ILE    64      41.929  48.712  37.860
ATOM    907  CG2 ILE    64      44.041  48.861  37.140
ATOM    908 HG21 ILE    64      44.517  47.881  37.122
ATOM    909 HG22 ILE    64      44.514  49.368  36.298
ATOM    910 HG23 ILE    64      44.304  49.404  38.048
ATOM    911  CG1 ILE    64      42.100  50.177  36.428
ATOM    912 HG12 ILE    64      42.522  50.360  35.439
ATOM    913 HG13 ILE    64      41.044  50.161  36.158
ATOM    914  CD1 ILE    64      42.411  51.453  37.331
ATOM    915 HD11 ILE    64      43.446  51.754  37.165
ATOM    916 HD12 ILE    64      41.832  52.311  36.992
ATOM    917 HD13 ILE    64      42.379  51.173  38.384
ATOM    918  C   ILE    64      42.182  46.261  36.796
ATOM    919  O   ILE    64      41.128  45.863  37.371
ATOM    920  N   ALA    65      43.316  45.580  36.931
ATOM    921  H   ALA    65      44.156  45.848  36.437
ATOM    922  CA  ALA    65      43.582  44.568  37.948
ATOM    923  HA  ALA    65      42.663  44.180  38.388
ATOM    924  CB  ALA    65      44.545  43.476  37.430
ATOM    925  HB1 ALA    65      45.021  42.811  38.150
ATOM    926  HB2 ALA    65      44.003  42.831  36.737
ATOM    927  HB3 ALA    65      45.393  43.981  36.967
ATOM    928  C   ALA    65      44.218  45.279  39.154
ATOM    929  O   ALA    65      45.069  46.151  39.092
ATOM    930  N   THR    66      43.772  44.930  40.404
ATOM    931  H   THR    66      43.040  44.235  40.360
ATOM    932  CA  THR    66      44.350  45.369  41.637
ATOM    933  HA  THR    66      44.902  46.297  41.483
ATOM    934  CB  THR    66      43.241  45.480  42.718
ATOM    935  HB  THR    66      43.706  46.012  43.548
ATOM    936  CG2 THR    66      41.975  46.173  42.318
ATOM    937 HG21 THR    66      41.470  45.508  41.618
ATOM    938 HG22 THR    66      41.348  46.291  43.203
ATOM    939 HG23 THR    66      42.266  47.151  41.936
ATOM    940  OG1 THR    66      42.834  44.122  43.006
ATOM    941  HG1 THR    66      41.886  44.187  43.139
ATOM    942  C   THR    66      45.452  44.449  42.130
ATOM    943  O   THR    66      46.401  44.915  42.783
ATOM    944  N   ARG    67      45.378  43.171  41.744
ATOM    945  H   ARG    67      44.629  42.831  41.157
ATOM    946  CA  ARG    67      46.167  42.155  42.409
ATOM    947  HA  ARG    67      46.555  42.501  43.366
ATOM    948  CB  ARG    67      45.404  40.927  42.789
ATOM    949  HB2 ARG    67      44.765  40.614  41.963
ATOM    950  HB3 ARG    67      46.091  40.093  42.927
ATOM    951  CG  ARG    67      44.507  41.217  43.973
ATOM    952  HG2 ARG    67      44.162  42.251  43.985
ATOM    953  HG3 ARG    67      43.656  40.538  43.939
ATOM    954  CD  ARG    67      45.180  41.002  45.280
ATOM    955  HD2 ARG    67      45.719  40.055  45.257
ATOM    956  HD3 ARG    67      45.917  41.806  45.281
ATOM    957  NE  ARG    67      44.259  41.238  46.358
ATOM    958  HE  ARG    67      43.282  41.318  46.111
ATOM    959  CZ  ARG    67      44.612  41.332  47.640
ATOM    960  NH1 ARG    67      45.779  41.045  48.112
ATOM    961 HH11 ARG    67      46.426  40.725  47.405
ATOM    962 HH12 ARG    67      45.965  41.070  49.105
ATOM    963  NH2 ARG    67      43.662  41.716  48.421
ATOM    964 HH21 ARG    67      42.905  42.206  47.965
ATOM    965 HH22 ARG    67      43.844  42.149  49.315
ATOM    966  C   ARG    67      47.318  41.723  41.585
ATOM    967  O   ARG    67      47.178  41.293  40.449
ATOM    968  N   GLY    68      48.501  41.709  42.250
ATOM    969  H   GLY    68      48.476  41.760  43.258
ATOM    970  CA  GLY    68      49.763  41.115  41.760
ATOM    971  HA2 GLY    68      50.134  41.597  40.855
ATOM    972  HA3 GLY    68      50.494  41.106  42.567
ATOM    973  C   GLY    68      49.522  39.740  41.267
ATOM    974  O   GLY    68      49.959  39.396  40.163
ATOM    975  N   GLN    69      48.744  38.962  41.953
ATOM    976  H   GLN    69      48.485  39.241  42.888
ATOM    977  CA  GLN    69      48.547  37.570  41.582
ATOM    978  HA  GLN    69      49.521  37.082  41.570
ATOM    979  CB  GLN    69      47.591  36.936  42.584
ATOM    980  HB2 GLN    69      47.958  37.004  43.608
ATOM    981  HB3 GLN    69      46.644  37.471  42.515
ATOM    982  CG  GLN    69      47.256  35.478  42.251
ATOM    983  HG2 GLN    69      46.732  35.385  41.299
ATOM    984  HG3 GLN    69      48.165  34.886  42.146
ATOM    985  CD  GLN    69      46.423  34.942  43.359
ATOM    986  OE1 GLN    69      45.338  35.424  43.598
ATOM    987  NE2 GLN    69      46.886  33.958  44.123
ATOM    988 HE21 GLN    69      46.248  33.527  44.778
ATOM    989 HE22 GLN    69      47.802  33.537  44.068
ATOM    990  C   GLN    69      47.909  37.481  40.197
ATOM    991  O   GLN    69      48.443  36.739  39.409
ATOM    992  N   LEU    70      46.812  38.211  39.876
ATOM    993  H   LEU    70      46.277  38.748  40.543
ATOM    994  CA  LEU    70      46.368  38.068  38.486
ATOM    995  HA  LEU    70      46.301  36.995  38.307
ATOM    996  CB  LEU    70      44.964  38.713  38.395
ATOM    997  HB2 LEU    70      44.275  38.262  39.108
ATOM    998  HB3 LEU    70      44.996  39.780  38.614
ATOM    999  CG  LEU    70      44.332  38.662  37.001
ATOM   1000  HG  LEU    70      44.919  39.360  36.404
ATOM   1001  CD1 LEU    70      44.217  37.351  36.340
ATOM   1002 HD11 LEU    70      45.192  36.865  36.298
ATOM   1003 HD12 LEU    70      43.491  36.709  36.839
ATOM   1004 HD13 LEU    70      43.918  37.447  35.298
ATOM   1005  CD2 LEU    70      42.970  39.335  37.044
ATOM   1006 HD21 LEU    70      43.059  40.348  37.438
ATOM   1007 HD22 LEU    70      42.503  39.391  36.060
ATOM   1008 HD23 LEU    70      42.299  38.710  37.632
ATOM   1009  C   LEU    70      47.415  38.606  37.468
ATOM   1010  O   LEU    70      47.657  37.972  36.468
ATOM   1011  N   ILE    71      47.992  39.783  37.813
ATOM   1012  H   ILE    71      47.680  40.223  38.666
ATOM   1013  CA  ILE    71      48.989  40.388  36.942
ATOM   1014  HA  ILE    71      48.549  40.689  35.991
ATOM   1015  CB  ILE    71      49.698  41.620  37.619
ATOM   1016  HB  ILE    71      50.189  41.158  38.475
ATOM   1017  CG2 ILE    71      50.849  42.319  36.947
ATOM   1018 HG21 ILE    71      51.426  43.014  37.558
ATOM   1019 HG22 ILE    71      51.498  41.475  36.714
ATOM   1020 HG23 ILE    71      50.558  42.957  36.112
ATOM   1021  CG1 ILE    71      48.590  42.682  38.015
ATOM   1022 HG12 ILE    71      48.388  43.257  37.111
ATOM   1023 HG13 ILE    71      47.624  42.209  38.194
ATOM   1024  CD1 ILE    71      48.988  43.767  39.121
ATOM   1025 HD11 ILE    71      48.147  44.460  39.167
ATOM   1026 HD12 ILE    71      49.206  43.260  40.062
ATOM   1027 HD13 ILE    71      49.917  44.266  38.847
ATOM   1028  C   ILE    71      50.072  39.330  36.571
ATOM   1029  O   ILE    71      50.349  39.184  35.368
ATOM   1030  N   ARG    72      50.704  38.663  37.519
ATOM   1031  H   ARG    72      50.584  38.895  38.495
ATOM   1032  CA  ARG    72      51.649  37.590  37.296
ATOM   1033  HA  ARG    72      52.429  38.034  36.678
ATOM   1034  CB  ARG    72      52.214  37.219  38.770
ATOM   1035  HB2 ARG    72      52.646  38.108  39.229
ATOM   1036  HB3 ARG    72      51.441  36.837  39.437
ATOM   1037  CG  ARG    72      53.297  36.180  38.814
ATOM   1038  HG2 ARG    72      52.925  35.203  38.504
ATOM   1039  HG3 ARG    72      54.134  36.501  38.193
ATOM   1040  CD  ARG    72      53.978  36.001  40.195
ATOM   1041  HD2 ARG    72      54.090  36.935  40.745
ATOM   1042  HD3 ARG    72      53.243  35.511  40.833
ATOM   1043  NE  ARG    72      55.279  35.379  40.163
ATOM   1044  HE  ARG    72      56.043  36.018  40.332
ATOM   1045  CZ  ARG    72      55.557  34.112  39.889
ATOM   1046  NH1 ARG    72      54.745  33.172  40.021
ATOM   1047 HH11 ARG    72      53.740  33.272  40.051
ATOM   1048 HH12 ARG    72      55.120  32.252  40.200
ATOM   1049  NH2 ARG    72      56.808  33.781  39.661
ATOM   1050 HH21 ARG    72      57.564  34.442  39.549
ATOM   1051 HH22 ARG    72      56.956  32.828  39.360
ATOM   1052  C   ARG    72      51.062  36.338  36.570
ATOM   1053  O   ARG    72      51.799  35.587  35.932
ATOM   1054  N   GLU    73      49.770  36.151  36.538
ATOM   1055  H   GLU    73      49.227  36.752  37.142
ATOM   1056  CA  GLU    73      49.160  35.095  35.676
ATOM   1057  HA  GLU    73      49.860  34.261  35.713
ATOM   1058  CB  GLU    73      47.833  34.527  36.284
ATOM   1059  HB2 GLU    73      47.114  35.321  36.488
ATOM   1060  HB3 GLU    73      47.478  33.927  35.447
ATOM   1061  CG  GLU    73      48.160  33.691  37.525
ATOM   1062  HG2 GLU    73      48.850  32.863  37.362
ATOM   1063  HG3 GLU    73      48.513  34.326  38.338
ATOM   1064  CD  GLU    73      46.858  33.005  37.937
ATOM   1065  OE1 GLU    73      46.238  32.203  37.180
ATOM   1066  OE2 GLU    73      46.420  33.219  39.143
ATOM   1067  C   GLU    73      48.788  35.509  34.265
ATOM   1068  O   GLU    73      48.927  34.677  33.346
ATOM   1069  N   ALA    74      48.242  36.727  34.093
ATOM   1070  H   ALA    74      48.211  37.274  34.941
ATOM   1071  CA  ALA    74      48.253  37.302  32.776
ATOM   1072  HA  ALA    74      47.558  36.771  32.124
ATOM   1073  CB  ALA    74      47.654  38.721  32.967
ATOM   1074  HB1 ALA    74      47.662  39.327  32.062
ATOM   1075  HB2 ALA    74      46.614  38.672  33.293
ATOM   1076  HB3 ALA    74      48.083  39.319  33.772
ATOM   1077  C   ALA    74      49.602  37.285  32.102
ATOM   1078  O   ALA    74      49.740  37.094  30.922
ATOM   1079  N   TYR    75      50.697  37.633  32.864
ATOM   1080  H   TYR    75      50.515  38.014  33.781
ATOM   1081  CA  TYR    75      52.062  37.718  32.378
ATOM   1082  HA  TYR    75      52.136  38.360  31.501
ATOM   1083  CB  TYR    75      52.912  38.344  33.495
ATOM   1084  HB2 TYR    75      52.472  38.182  34.479
ATOM   1085  HB3 TYR    75      53.833  37.764  33.546
ATOM   1086  CG  TYR    75      53.222  39.835  33.365
ATOM   1087  CD1 TYR    75      54.632  40.142  33.231
ATOM   1088  HD1 TYR    75      55.356  39.343  33.166
ATOM   1089  CE1 TYR    75      55.021  41.478  33.053
ATOM   1090  HE1 TYR    75      56.052  41.740  32.866
ATOM   1091  CZ  TYR    75      54.012  42.517  33.022
ATOM   1092  OH  TYR    75      54.429  43.816  32.820
ATOM   1093  HH  TYR    75      53.717  44.459  32.792
ATOM   1094  CE2 TYR    75      52.618  42.194  33.063
ATOM   1095  HE2 TYR    75      51.835  42.903  32.840
ATOM   1096  CD2 TYR    75      52.244  40.854  33.326
ATOM   1097  HD2 TYR    75      51.204  40.562  33.325
ATOM   1098  C   TYR    75      52.675  36.393  31.954
ATOM   1099  O   TYR    75      53.673  36.337  31.207
ATOM   1100  N   GLU    76      52.219  35.238  32.432
ATOM   1101  H   GLU    76      51.494  35.359  33.123
ATOM   1102  CA  GLU    76      52.862  33.928  32.119
ATOM   1103  HA  GLU    76      53.931  34.050  32.293
ATOM   1104  CB  GLU    76      52.476  32.775  33.093
ATOM   1105  HB2 GLU    76      52.630  33.154  34.102
ATOM   1106  HB3 GLU    76      51.462  32.463  32.835
ATOM   1107  CG  GLU    76      53.319  31.484  32.755
ATOM   1108  HG2 GLU    76      52.989  30.974  31.850
ATOM   1109  HG3 GLU    76      54.323  31.898  32.654
ATOM   1110  CD  GLU    76      53.276  30.415  33.795
ATOM   1111  OE1 GLU    76      52.175  29.893  34.060
ATOM   1112  OE2 GLU    76      54.344  30.105  34.384
ATOM   1113  C   GLU    76      52.726  33.529  30.632
ATOM   1114  O   GLU    76      53.720  33.479  29.910
ATOM   1115  N   ASP    77      51.513  33.097  30.190
ATOM   1116  H   ASP    77      50.698  33.082  30.786
ATOM   1117  CA  ASP    77      51.249  32.624  28.856
ATOM   1118  HA  ASP    77      52.183  32.196  28.489
ATOM   1119  CB  ASP    77      50.060  31.602  28.925
ATOM   1120  HB2 ASP    77      50.342  30.756  29.554
ATOM   1121  HB3 ASP    77      49.138  32.130  29.163
ATOM   1122  CG  ASP    77      49.840  31.137  27.511
ATOM   1123  OD1 ASP    77      50.679  31.055  26.640
ATOM   1124  OD2 ASP    77      48.638  30.900  27.293
ATOM   1125  C   ASP    77      50.880  33.771  27.845
ATOM   1126  O   ASP    77      49.813  34.327  27.949
ATOM   1127  N   TYR    78      51.812  33.912  26.868
ATOM   1128  H   TYR    78      52.666  33.373  26.898
ATOM   1129  CA  TYR    78      51.665  34.903  25.725
ATOM   1130  HA  TYR    78      51.579  35.895  26.167
ATOM   1131  CB  TYR    78      52.908  34.811  24.827
ATOM   1132  HB2 TYR    78      53.709  35.132  25.493
ATOM   1133  HB3 TYR    78      53.077  33.830  24.383
ATOM   1134  CG  TYR    78      52.908  35.777  23.674
ATOM   1135  CD1 TYR    78      52.752  37.164  23.995
ATOM   1136  HD1 TYR    78      52.414  37.588  24.929
ATOM   1137  CE1 TYR    78      52.980  38.082  22.988
ATOM   1138  HE1 TYR    78      52.860  39.129  23.225
ATOM   1139  CZ  TYR    78      53.233  37.639  21.638
ATOM   1140  OH  TYR    78      53.346  38.521  20.608
ATOM   1141  HH  TYR    78      53.314  39.437  20.895
ATOM   1142  CE2 TYR    78      53.285  36.293  21.270
ATOM   1143  HE2 TYR    78      53.417  36.078  20.220
ATOM   1144  CD2 TYR    78      53.084  35.324  22.291
ATOM   1145  HD2 TYR    78      53.115  34.261  22.105
ATOM   1146  C   TYR    78      50.418  34.495  24.883
ATOM   1147  O   TYR    78      49.822  35.322  24.182
ATOM   1148  N   ARG    79      50.015  33.207  24.816
ATOM   1149  H   ARG    79      50.604  32.517  25.260
ATOM   1150  CA  ARG    79      48.866  32.849  24.014
ATOM   1151  HA  ARG    79      49.011  33.344  23.052
ATOM   1152  CB  ARG    79      48.872  31.367  23.689
ATOM   1153  HB2 ARG    79      48.661  30.742  24.557
ATOM   1154  HB3 ARG    79      48.008  31.075  23.092
ATOM   1155  CG  ARG    79      50.175  31.035  22.948
ATOM   1156  HG2 ARG    79      50.026  31.588  22.019
ATOM   1157  HG3 ARG    79      51.061  31.503  23.376
ATOM   1158  CD  ARG    79      50.313  29.521  22.892
ATOM   1159  HD2 ARG    79      51.342  29.255  22.649
ATOM   1160  HD3 ARG    79      50.114  29.011  23.834
ATOM   1161  NE  ARG    79      49.425  29.034  21.877
ATOM   1162  HE  ARG    79      48.587  29.566  21.694
ATOM   1163  CZ  ARG    79      49.432  27.778  21.484
ATOM   1164  NH1 ARG    79      50.441  27.003  21.812
ATOM   1165 HH11 ARG    79      51.349  27.290  22.149
ATOM   1166 HH12 ARG    79      50.398  25.996  21.877
ATOM   1167  NH2 ARG    79      48.431  27.189  20.810
ATOM   1168 HH21 ARG    79      47.675  27.769  20.477
ATOM   1169 HH22 ARG    79      48.535  26.191  20.690
ATOM   1170  C   ARG    79      47.522  33.319  24.558
ATOM   1171  O   ARG    79      46.562  33.327  23.789
ATOM   1172  N   HIE    80      47.432  33.623  25.873
ATOM   1173  H   HIE    80      48.197  33.485  26.518
ATOM   1174  CA  HIE    80      46.207  34.166  26.491
ATOM   1175  HA  HIE    80      45.422  33.914  25.778
ATOM   1176  CB  HIE    80      45.832  33.421  27.712
ATOM   1177  HB2 HIE    80      45.811  32.349  27.515
ATOM   1178  HB3 HIE    80      46.627  33.573  28.443
ATOM   1179  CG  HIE    80      44.534  33.708  28.552
ATOM   1180  ND1 HIE    80      44.414  33.889  29.928
ATOM   1181  CE1 HIE    80      43.182  34.219  30.165
ATOM   1182  HE1 HIE    80      42.837  34.522  31.143
ATOM   1183  NE2 HIE    80      42.391  34.145  29.040
ATOM   1184  HE2 HIE    80      41.389  34.262  29.080
ATOM   1185  CD2 HIE    80      43.231  33.815  28.015
ATOM   1186  HD2 HIE    80      42.955  33.750  26.973
ATOM   1187  C   HIE    80      46.159  35.726  26.647
ATOM   1188  O   HIE    80      45.125  36.375  26.711
ATOM   1189  N   PHE    81      47.272  36.359  26.779
ATOM   1190  H   PHE    81      48.122  35.817  26.741
ATOM   1191  CA  PHE    81      47.413  37.863  26.937
ATOM   1192  HA  PHE    81      46.604  38.427  26.474
ATOM   1193  CB  PHE    81      47.362  38.112  28.473
ATOM   1194  HB2 PHE    81      47.979  37.445  29.077
ATOM   1195  HB3 PHE    81      47.890  39.050  28.648
ATOM   1196  CG  PHE    81      45.955  38.170  29.194
ATOM   1197  CD1 PHE    81      45.153  39.294  29.155
ATOM   1198  HD1 PHE    81      45.345  40.122  28.489
ATOM   1199  CE1 PHE    81      44.055  39.332  30.049
ATOM   1200  HE1 PHE    81      43.383  40.175  30.108
ATOM   1201  CZ  PHE    81      43.715  38.292  30.842
ATOM   1202  HZ  PHE    81      42.803  38.288  31.421
ATOM   1203  CE2 PHE    81      44.474  37.131  30.860
ATOM   1204  HE2 PHE    81      44.346  36.312  31.552
ATOM   1205  CD2 PHE    81      45.665  37.065  30.033
ATOM   1206  HD2 PHE    81      46.379  36.256  30.084
ATOM   1207  C   PHE    81      48.692  38.423  26.347
ATOM   1208  O   PHE    81      49.713  37.776  26.561
ATOM   1209  N   SER    82      48.635  39.513  25.636
ATOM   1210  H   SER    82      47.809  40.087  25.729
ATOM   1211  CA  SER    82      49.806  40.074  24.876
ATOM   1212  HA  SER    82      50.691  39.506  25.160
ATOM   1213  CB  SER    82      49.563  39.923  23.426
ATOM   1214  HB2 SER    82      49.594  38.873  23.136
ATOM   1215  HB3 SER    82      48.609  40.340  23.103
ATOM   1216  OG  SER    82      50.627  40.596  22.750
ATOM   1217  HG  SER    82      50.373  40.527  21.827
ATOM   1218  C   SER    82      50.161  41.464  25.354
ATOM   1219  O   SER    82      49.268  42.278  25.588
ATOM   1220  N   SER    83      51.445  41.822  25.513
ATOM   1221  H   SER    83      52.114  41.101  25.742
ATOM   1222  CA  SER    83      52.042  43.113  25.656
ATOM   1223  HA  SER    83      51.569  43.589  26.516
ATOM   1224  CB  SER    83      53.457  42.945  26.010
ATOM   1225  HB2 SER    83      53.904  42.426  25.162
ATOM   1226  HB3 SER    83      53.949  43.910  26.128
ATOM   1227  OG  SER    83      53.596  42.290  27.248
ATOM   1228  HG  SER    83      54.232  42.821  27.732
ATOM   1229  C   SER    83      51.986  44.014  24.386
ATOM   1230  O   SER    83      52.516  45.099  24.461
ATOM   1231  N   GLU    84      51.358  43.587  23.246
ATOM   1232  H   GLU    84      50.958  42.668  23.372
ATOM   1233  CA  GLU    84      51.670  44.081  21.872
ATOM   1234  HA  GLU    84      52.747  43.973  21.744
ATOM   1235  CB  GLU    84      51.026  43.292  20.746
ATOM   1236  HB2 GLU    84      51.165  43.859  19.824
ATOM   1237  HB3 GLU    84      51.494  42.309  20.698
ATOM   1238  CG  GLU    84      49.509  43.214  20.970
ATOM   1239  HG2 GLU    84      49.205  42.527  21.760
ATOM   1240  HG3 GLU    84      49.095  44.143  21.362
ATOM   1241  CD  GLU    84      48.661  42.827  19.698
ATOM   1242  OE1 GLU    84      48.547  43.717  18.796
ATOM   1243  OE2 GLU    84      48.012  41.714  19.642
ATOM   1244  C   GLU    84      51.426  45.603  21.689
ATOM   1245  O   GLU    84      52.065  46.307  20.852
ATOM   1246  N   CYS    85      50.561  46.140  22.503
ATOM   1247  H   CYS    85      50.134  45.514  23.170
ATOM   1248  CA  CYS    85      50.599  47.610  22.840
ATOM   1249  HA  CYS    85      51.540  48.060  22.525
ATOM   1250  CB  CYS    85      49.443  48.254  22.098
ATOM   1251  HB2 CYS    85      49.551  48.026  21.038
ATOM   1252  HB3 CYS    85      48.607  47.814  22.642
ATOM   1253  SG  CYS    85      49.462  50.009  22.338
ATOM   1254  HG  CYS    85      48.577  50.187  21.353
ATOM   1255  C   CYS    85      50.446  47.768  24.351
ATOM   1256  O   CYS    85      49.366  47.445  24.913
ATOM   1257  N   PRO    86      51.461  48.165  25.125
ATOM   1258  CD  PRO    86      52.768  48.491  24.715
ATOM   1259  HD2 PRO    86      52.843  49.559  24.513
ATOM   1260  HD3 PRO    86      53.162  47.948  23.857
ATOM   1261  CG  PRO    86      53.651  48.132  25.885
ATOM   1262  HG2 PRO    86      54.355  48.933  26.110
ATOM   1263  HG3 PRO    86      54.276  47.282  25.613
ATOM   1264  CB  PRO    86      52.759  47.769  27.131
ATOM   1265  HB2 PRO    86      53.058  48.366  27.992
ATOM   1266  HB3 PRO    86      52.801  46.699  27.338
ATOM   1267  CA  PRO    86      51.363  48.099  26.601
ATOM   1268  HA  PRO    86      50.764  47.265  26.966
ATOM   1269  C   PRO    86      50.817  49.429  27.105
ATOM   1270  O   PRO    86      50.799  49.667  28.326
ATOM   1271  N   PHE    87      50.448  50.361  26.192
ATOM   1272  H   PHE    87      50.513  50.233  25.192
ATOM   1273  CA  PHE    87      50.101  51.730  26.530
ATOM   1274  HA  PHE    87      50.205  51.909  27.599
ATOM   1275  CB  PHE    87      50.979  52.830  25.811
ATOM   1276  HB2 PHE    87      51.122  52.507  24.780
ATOM   1277  HB3 PHE    87      50.545  53.822  25.946
ATOM   1278  CG  PHE    87      52.475  52.953  26.382
ATOM   1279  CD1 PHE    87      53.282  53.884  25.799
ATOM   1280  HD1 PHE    87      52.888  54.491  24.998
ATOM   1281  CE1 PHE    87      54.612  54.120  26.269
ATOM   1282  HE1 PHE    87      55.214  54.831  25.723
ATOM   1283  CZ  PHE    87      55.176  53.218  27.267
ATOM   1284  HZ  PHE    87      56.199  53.330  27.599
ATOM   1285  CE2 PHE    87      54.288  52.344  27.941
ATOM   1286  HE2 PHE    87      54.666  51.709  28.729
ATOM   1287  CD2 PHE    87      52.949  52.194  27.472
ATOM   1288  HD2 PHE    87      52.285  51.503  27.971
ATOM   1289  C   PHE    87      48.583  51.896  26.288
ATOM   1290  O   PHE    87      48.183  51.902  25.100
ATOM   1291  N   ILE    88      47.748  51.868  27.344
ATOM   1292  H   ILE    88      48.141  51.756  28.269
ATOM   1293  CA  ILE    88      46.319  51.729  27.302
ATOM   1294  HA  ILE    88      46.196  51.040  26.466
ATOM   1295  CB  ILE    88      45.802  50.942  28.536
ATOM   1296  HB  ILE    88      46.617  50.269  28.804
ATOM   1297  CG2 ILE    88      45.542  51.981  29.662
ATOM   1298 HG21 ILE    88      44.714  52.609  29.337
ATOM   1299 HG22 ILE    88      45.227  51.449  30.559
ATOM   1300 HG23 ILE    88      46.382  52.657  29.821
ATOM   1301  CG1 ILE    88      44.545  50.019  28.239
ATOM   1302 HG12 ILE    88      43.791  50.581  27.688
ATOM   1303 HG13 ILE    88      44.803  49.159  27.621
ATOM   1304  CD1 ILE    88      43.942  49.291  29.438
ATOM   1305 HD11 ILE    88      43.671  50.092  30.125
ATOM   1306 HD12 ILE    88      43.079  48.663  29.217
ATOM   1307 HD13 ILE    88      44.747  48.690  29.860
ATOM   1308  C   ILE    88      45.459  52.916  26.917
ATOM   1309  O   ILE    88      44.350  52.660  26.365
ATOM   1310  N   PRO    89      45.789  54.191  27.279
ATOM   1311  CD  PRO    89      47.010  54.689  27.943
ATOM   1312  HD2 PRO    89      47.941  54.422  27.442
ATOM   1313  HD3 PRO    89      47.009  54.369  28.985
ATOM   1314  CG  PRO    89      46.816  56.209  27.859
ATOM   1315  HG2 PRO    89      47.420  56.668  27.077
ATOM   1316  HG3 PRO    89      47.041  56.661  28.825
ATOM   1317  CB  PRO    89      45.341  56.511  27.519
ATOM   1318  HB2 PRO    89      45.154  57.345  26.843
ATOM   1319  HB3 PRO    89      44.746  56.729  28.406
ATOM   1320  CA  PRO    89      44.826  55.247  26.889
ATOM   1321  HA  PRO    89      43.841  54.935  27.234
ATOM   1322  C   PRO    89      44.819  55.421  25.398
ATOM   1323  O   PRO    89      45.856  55.228  24.738
ATOM   1324  N   ARG    90      43.607  55.738  24.866
ATOM   1325  H   ARG    90      42.844  55.675  25.524
ATOM   1326  CA  ARG    90      43.255  55.674  23.460
ATOM   1327  HA  ARG    90      43.214  54.631  23.149
ATOM   1328  CB  ARG    90      41.880  56.274  23.207
ATOM   1329  HB2 ARG    90      41.264  55.861  24.006
ATOM   1330  HB3 ARG    90      41.849  57.355  23.073
ATOM   1331  CG  ARG    90      41.268  55.687  21.925
ATOM   1332  HG2 ARG    90      40.469  56.388  21.685
ATOM   1333  HG3 ARG    90      41.985  55.779  21.108
ATOM   1334  CD  ARG    90      40.554  54.322  22.058
ATOM   1335  HD2 ARG    90      40.070  54.244  23.032
ATOM   1336  HD3 ARG    90      39.778  54.229  21.298
ATOM   1337  NE  ARG    90      41.453  53.225  22.069
ATOM   1338  HE  ARG    90      41.656  52.817  22.970
ATOM   1339  CZ  ARG    90      42.141  52.661  21.077
ATOM   1340  NH1 ARG    90      41.748  52.849  19.822
ATOM   1341 HH11 ARG    90      41.034  53.522  19.582
ATOM   1342 HH12 ARG    90      42.152  52.344  19.046
ATOM   1343  NH2 ARG    90      43.163  51.847  21.313
ATOM   1344 HH21 ARG    90      43.420  51.734  22.284
ATOM   1345 HH22 ARG    90      43.696  51.379  20.594
ATOM   1346  C   ARG    90      44.309  56.337  22.563
ATOM   1347  O   ARG    90      44.712  55.830  21.561
ATOM   1348  N   GLU    91      44.759  57.552  22.923
ATOM   1349  H   GLU    91      44.160  58.094  23.531
ATOM   1350  CA  GLU    91      45.716  58.371  22.203
ATOM   1351  HA  GLU    91      45.350  58.672  21.223
ATOM   1352  CB  GLU    91      46.008  59.658  22.984
ATOM   1353  HB2 GLU    91      45.844  59.486  24.047
ATOM   1354  HB3 GLU    91      46.948  60.091  22.644
ATOM   1355  CG  GLU    91      45.027  60.732  22.499
ATOM   1356  HG2 GLU    91      45.168  61.459  23.299
ATOM   1357  HG3 GLU    91      45.256  61.155  21.521
ATOM   1358  CD  GLU    91      43.608  60.348  22.509
ATOM   1359  OE1 GLU    91      43.090  59.911  23.583
ATOM   1360  OE2 GLU    91      42.945  60.496  21.461
ATOM   1361  C   GLU    91      47.016  57.533  21.928
ATOM   1362  O   GLU    91      47.651  57.766  20.848
ATOM   1363  N   ALA    92      47.449  56.751  22.904
ATOM   1364  H   ALA    92      46.947  56.600  23.767
ATOM   1365  CA  ALA    92      48.648  55.918  22.706
ATOM   1366  HA  ALA    92      49.277  56.457  22.000
ATOM   1367  CB  ALA    92      49.226  55.855  24.192
ATOM   1368  HB1 ALA    92      50.214  55.397  24.223
ATOM   1369  HB2 ALA    92      49.421  56.849  24.595
ATOM   1370  HB3 ALA    92      48.453  55.470  24.857
ATOM   1371  C   ALA    92      48.254  54.691  21.982
ATOM   1372  O   ALA    92      48.904  54.319  21.015
ATOM   1373  N   GLY    93      47.103  54.117  22.379
ATOM   1374  H   GLY    93      46.589  54.480  23.169
ATOM   1375  CA  GLY    93      46.584  52.928  21.704
ATOM   1376  HA2 GLY    93      47.371  52.180  21.809
ATOM   1377  HA3 GLY    93      45.662  52.576  22.167
ATOM   1378  C   GLY    93      46.336  53.029  20.168
ATOM   1379  O   GLY    93      46.414  52.066  19.452
ATOM   1380  N   GLU    94      46.042  54.265  19.693
ATOM   1381  H   GLU    94      45.870  55.046  20.311
ATOM   1382  CA  GLU    94      45.831  54.462  18.238
ATOM   1383  HA  GLU    94      45.409  53.555  17.807
ATOM   1384  CB  GLU    94      44.624  55.390  18.166
ATOM   1385  HB2 GLU    94      44.130  55.294  17.199
ATOM   1386  HB3 GLU    94      43.901  55.112  18.933
ATOM   1387  CG  GLU    94      45.042  56.861  18.343
ATOM   1388  HG2 GLU    94      45.536  57.038  19.298
ATOM   1389  HG3 GLU    94      45.821  57.153  17.639
ATOM   1390  CD  GLU    94      43.826  57.768  18.203
ATOM   1391  OE1 GLU    94      42.692  57.535  18.703
ATOM   1392  OE2 GLU    94      43.961  58.857  17.710
ATOM   1393  C   GLU    94      47.080  54.927  17.428
ATOM   1394  O   GLU    94      47.014  55.264  16.217
ATOM   1395  N   ALA    95      48.271  54.837  18.021
ATOM   1396  H   ALA    95      48.249  54.430  18.945
ATOM   1397  CA  ALA    95      49.537  55.353  17.472
ATOM   1398  HA  ALA    95      49.578  55.120  16.407
ATOM   1399  CB  ALA    95      49.526  56.839  17.691
ATOM   1400  HB1 ALA    95      48.683  57.327  17.200
ATOM   1401  HB2 ALA    95      49.289  57.072  18.729
ATOM   1402  HB3 ALA    95      50.476  57.333  17.489
ATOM   1403  C   ALA    95      50.804  54.752  17.938
ATOM   1404  O   ALA    95      51.835  54.822  17.287
ATOM   1405  N   TYR    96      50.738  53.947  18.988
ATOM   1406  H   TYR    96      49.917  53.945  19.577
ATOM   1407  CA  TYR    96      51.872  53.160  19.521
ATOM   1408  HA  TYR    96      52.829  53.666  19.643
ATOM   1409  CB  TYR    96      51.480  52.674  20.906
ATOM   1410  HB2 TYR    96      51.283  53.514  21.572
ATOM   1411  HB3 TYR    96      50.617  52.024  20.762
ATOM   1412  CG  TYR    96      52.482  51.714  21.575
ATOM   1413  CD1 TYR    96      52.680  50.428  21.132
ATOM   1414  HD1 TYR    96      52.009  49.982  20.413
ATOM   1415  CE1 TYR    96      53.736  49.674  21.668
ATOM   1416  HE1 TYR    96      54.083  48.756  21.216
ATOM   1417  CZ  TYR    96      54.537  50.168  22.710
ATOM   1418  OH  TYR    96      55.608  49.446  23.053
ATOM   1419  HH  TYR    96      56.149  49.757  23.783
ATOM   1420  CE2 TYR    96      54.168  51.376  23.299
ATOM   1421  HE2 TYR    96      54.845  51.719  24.068
ATOM   1422  CD2 TYR    96      53.118  52.126  22.771
ATOM   1423  HD2 TYR    96      52.929  53.075  23.254
ATOM   1424  C   TYR    96      52.023  52.026  18.554
ATOM   1425  O   TYR    96      51.039  51.358  18.274
ATOM   1426  N   ASP    97      53.213  51.721  18.063
ATOM   1427  H   ASP    97      54.080  52.109  18.407
ATOM   1428  CA  ASP    97      53.546  50.460  17.265
ATOM   1429  HA  ASP    97      53.305  49.617  17.912
ATOM   1430  CB  ASP    97      52.872  50.390  15.868
ATOM   1431  HB2 ASP    97      51.786  50.394  15.960
ATOM   1432  HB3 ASP    97      53.155  51.308  15.353
ATOM   1433  CG  ASP    97      53.370  49.190  15.094
ATOM   1434  OD1 ASP    97      54.077  49.339  14.027
ATOM   1435  OD2 ASP    97      52.958  48.102  15.461
ATOM   1436  C   ASP    97      55.072  50.569  17.192
ATOM   1437  O   ASP    97      55.668  51.472  16.603
ATOM   1438  N   PHE    98      55.839  49.673  17.877
ATOM   1439  H   PHE    98      55.384  48.896  18.337
ATOM   1440  CA  PHE    98      57.273  49.682  18.139
ATOM   1441  HA  PHE    98      57.790  50.185  17.322
ATOM   1442  CB  PHE    98      57.572  50.403  19.436
ATOM   1443  HB2 PHE    98      57.018  49.840  20.188
ATOM   1444  HB3 PHE    98      58.637  50.361  19.661
ATOM   1445  CG  PHE    98      57.199  51.880  19.602
ATOM   1446  CD1 PHE    98      56.502  52.250  20.803
ATOM   1447  HD1 PHE    98      56.145  51.436  21.415
ATOM   1448  CE1 PHE    98      56.413  53.631  21.194
ATOM   1449  HE1 PHE    98      55.977  53.975  22.121
ATOM   1450  CZ  PHE    98      56.818  54.614  20.279
ATOM   1451  HZ  PHE    98      56.685  55.644  20.574
ATOM   1452  CE2 PHE    98      57.264  54.246  19.021
ATOM   1453  HE2 PHE    98      57.468  55.015  18.290
ATOM   1454  CD2 PHE    98      57.669  52.931  18.752
ATOM   1455  HD2 PHE    98      58.148  52.630  17.832
ATOM   1456  C   PHE    98      57.902  48.317  18.287
ATOM   1457  O   PHE    98      57.289  47.403  18.881
ATOM   1458  N   ILE    99      59.126  48.144  17.818
ATOM   1459  H   ILE    99      59.614  48.987  17.549
ATOM   1460  CA  ILE    99      59.890  46.853  17.672
ATOM   1461  HA  ILE    99      59.191  46.023  17.569
ATOM   1462  CB  ILE    99      60.878  46.908  16.485
ATOM   1463  HB  ILE    99      61.375  47.877  16.540
ATOM   1464  CG2 ILE    99      62.039  45.858  16.512
ATOM   1465 HG21 ILE    99      62.470  45.690  17.499
ATOM   1466 HG22 ILE    99      61.578  44.889  16.321
ATOM   1467 HG23 ILE    99      62.806  46.047  15.761
ATOM   1468  CG1 ILE    99      60.205  47.039  15.078
ATOM   1469 HG12 ILE    99      59.354  46.360  15.030
ATOM   1470 HG13 ILE    99      59.953  48.098  15.020
ATOM   1471  CD1 ILE    99      61.061  46.642  13.876
ATOM   1472 HD11 ILE    99      61.999  47.193  13.817
ATOM   1473 HD12 ILE    99      61.346  45.590  13.871
ATOM   1474 HD13 ILE    99      60.459  46.738  12.972
ATOM   1475  C   ILE    99      60.699  46.754  18.950
ATOM   1476  O   ILE    99      61.191  47.789  19.494
ATOM   1477  N   PRO   100      60.903  45.536  19.533
ATOM   1478  CD  PRO   100      61.885  45.362  20.610
ATOM   1479  HD2 PRO   100      61.711  45.988  21.485
ATOM   1480  HD3 PRO   100      62.830  45.652  20.149
ATOM   1481  CG  PRO   100      61.947  43.855  20.911
ATOM   1482  HG2 PRO   100      61.403  43.678  21.839
ATOM   1483  HG3 PRO   100      62.996  43.576  21.003
ATOM   1484  CB  PRO   100      61.298  43.174  19.710
ATOM   1485  HB2 PRO   100      60.757  42.265  19.976
ATOM   1486  HB3 PRO   100      61.950  42.834  18.905
ATOM   1487  CA  PRO   100      60.400  44.242  19.114
ATOM   1488  HA  PRO   100      60.560  44.274  18.036
ATOM   1489  C   PRO   100      58.987  43.934  19.514
ATOM   1490  O   PRO   100      58.224  43.213  18.861
ATOM   1491  N   THR   101      58.552  44.603  20.551
ATOM   1492  H   THR   101      59.121  45.253  21.076
ATOM   1493  CA  THR   101      57.181  44.506  21.127
ATOM   1494  HA  THR   101      57.145  43.662  21.816
ATOM   1495  CB  THR   101      57.029  45.806  22.041
ATOM   1496  HB  THR   101      57.007  46.678  21.386
ATOM   1497  CG2 THR   101      55.730  45.706  22.782
ATOM   1498 HG21 THR   101      55.405  44.693  23.021
ATOM   1499 HG22 THR   101      55.859  46.150  23.769
ATOM   1500 HG23 THR   101      54.846  46.044  22.242
ATOM   1501  OG1 THR   101      58.180  45.678  22.919
ATOM   1502  HG1 THR   101      58.347  44.826  23.325
ATOM   1503  C   THR   101      56.045  44.240  20.167
ATOM   1504  O   THR   101      55.429  43.217  20.278
ATOM   1505  N   SER   102      55.756  45.093  19.249
ATOM   1506  H   SER   102      56.265  45.961  19.164
ATOM   1507  CA  SER   102      54.705  44.913  18.142
ATOM   1508  HA  SER   102      53.876  44.313  18.516
ATOM   1509  CB  SER   102      54.114  46.319  17.805
ATOM   1510  HB2 SER   102      54.854  46.843  17.200
ATOM   1511  HB3 SER   102      53.186  46.133  17.265
ATOM   1512  OG  SER   102      53.912  47.212  18.926
ATOM   1513  HG  SER   102      53.295  46.834  19.557
ATOM   1514  C   SER   102      55.085  44.128  16.938
ATOM   1515  O   SER   102      54.432  44.372  15.905
ATOM   1516  N   MET   103      55.983  43.115  17.020
ATOM   1517  H   MET   103      56.490  42.837  17.848
ATOM   1518  CA  MET   103      56.276  42.275  15.841
ATOM   1519  HA  MET   103      55.679  42.649  15.009
ATOM   1520  CB  MET   103      57.703  42.432  15.511
ATOM   1521  HB2 MET   103      58.305  42.206  16.391
ATOM   1522  HB3 MET   103      57.920  41.775  14.669
ATOM   1523  CG  MET   103      58.248  43.858  15.201
ATOM   1524  HG2 MET   103      57.840  44.593  15.896
ATOM   1525  HG3 MET   103      59.323  43.859  15.376
ATOM   1526  SD  MET   103      57.864  44.615  13.575
ATOM   1527  CE  MET   103      59.014  43.857  12.445
ATOM   1528  HE1 MET   103      58.752  42.873  12.054
ATOM   1529  HE2 MET   103      59.239  44.578  11.659
ATOM   1530  HE3 MET   103      60.017  43.781  12.864
ATOM   1531  C   MET   103      55.946  40.842  16.199
ATOM   1532  O   MET   103      55.934  40.418  17.315
ATOM   1533  N   ASP   104      55.438  40.066  15.204
ATOM   1534  H   ASP   104      55.415  40.272  14.216
ATOM   1535  CA  ASP   104      54.932  38.738  15.558
ATOM   1536  HA  ASP   104      54.298  38.947  16.419
ATOM   1537  CB  ASP   104      53.920  38.281  14.457
ATOM   1538  HB2 ASP   104      53.121  39.005  14.291
ATOM   1539  HB3 ASP   104      54.421  38.084  13.510
ATOM   1540  CG  ASP   104      53.199  37.042  14.875
ATOM   1541  OD1 ASP   104      53.142  36.195  13.958
ATOM   1542  OD2 ASP   104      52.704  36.853  16.031
ATOM   1543  C   ASP   104      56.135  37.820  15.755
ATOM   1544  O   ASP   104      57.037  37.849  14.942
ATOM   1545  N   PRO   105      56.078  36.814  16.701
ATOM   1546  CD  PRO   105      55.455  36.911  17.962
ATOM   1547  HD2 PRO   105      54.413  37.083  17.693
ATOM   1548  HD3 PRO   105      55.807  37.714  18.611
ATOM   1549  CG  PRO   105      55.721  35.610  18.660
ATOM   1550  HG2 PRO   105      54.913  34.914  18.437
ATOM   1551  HG3 PRO   105      55.699  35.739  19.743
ATOM   1552  CB  PRO   105      57.062  35.099  18.085
ATOM   1553  HB2 PRO   105      56.943  34.015  18.066
ATOM   1554  HB3 PRO   105      57.870  35.535  18.672
ATOM   1555  CA  PRO   105      57.007  35.704  16.726
ATOM   1556  HA  PRO   105      57.961  36.074  16.352
ATOM   1557  C   PRO   105      56.804  34.641  15.643
ATOM   1558  O   PRO   105      55.695  34.646  15.171
ATOM   1559  N   PRO   106      57.742  33.796  15.277
ATOM   1560  CD  PRO   106      57.379  32.829  14.288
ATOM   1561  HD2 PRO   106      57.328  33.355  13.335
ATOM   1562  HD3 PRO   106      56.408  32.375  14.490
ATOM   1563  CG  PRO   106      58.439  31.782  14.143
ATOM   1564  HG2 PRO   106      58.995  32.131  13.273
ATOM   1565  HG3 PRO   106      58.073  30.755  14.143
ATOM   1566  CB  PRO   106      59.241  32.046  15.449
ATOM   1567  HB2 PRO   106      60.294  31.764  15.435
ATOM   1568  HB3 PRO   106      58.728  31.449  16.204
ATOM   1569  CA  PRO   106      59.060  33.540  15.776
ATOM   1570  HA  PRO   106      59.036  33.583  16.865
ATOM   1571  C   PRO   106      60.124  34.543  15.326
ATOM   1572  O   PRO   106      61.114  34.624  16.035
ATOM   1573  N   GLU   107      59.896  35.228  14.203
ATOM   1574  H   GLU   107      59.117  35.012  13.598
ATOM   1575  CA  GLU   107      60.916  36.182  13.729
ATOM   1576  HA  GLU   107      61.820  35.606  13.533
ATOM   1577  CB  GLU   107      60.428  36.690  12.361
ATOM   1578  HB2 GLU   107      60.274  35.853  11.681
ATOM   1579  HB3 GLU   107      59.640  37.436  12.463
ATOM   1580  CG  GLU   107      61.545  37.343  11.560
ATOM   1581  HG2 GLU   107      61.993  38.110  12.193
ATOM   1582  HG3 GLU   107      62.361  36.629  11.452
ATOM   1583  CD  GLU   107      61.191  37.983  10.270
ATOM   1584  OE1 GLU   107      61.259  37.463   9.171
ATOM   1585  OE2 GLU   107      60.812  39.172  10.297
ATOM   1586  C   GLU   107      61.252  37.318  14.781
ATOM   1587  O   GLU   107      62.370  37.797  14.772
ATOM   1588  N   GLN   108      60.292  37.728  15.615
ATOM   1589  H   GLN   108      59.337  37.553  15.336
ATOM   1590  CA  GLN   108      60.475  38.721  16.636
ATOM   1591  HA  GLN   108      60.648  39.716  16.224
ATOM   1592  CB  GLN   108      59.327  38.722  17.539
ATOM   1593  HB2 GLN   108      58.379  38.955  17.052
ATOM   1594  HB3 GLN   108      59.349  37.730  17.990
ATOM   1595  CG  GLN   108      59.407  39.845  18.621
ATOM   1596  HG2 GLN   108      60.325  39.718  19.196
ATOM   1597  HG3 GLN   108      59.318  40.778  18.065
ATOM   1598  CD  GLN   108      58.438  39.744  19.856
ATOM   1599  OE1 GLN   108      58.926  39.544  20.975
ATOM   1600  NE2 GLN   108      57.102  39.899  19.859
ATOM   1601 HE21 GLN   108      56.629  39.662  20.719
ATOM   1602 HE22 GLN   108      56.607  39.999  18.984
ATOM   1603  C   GLN   108      61.784  38.503  17.475
ATOM   1604  O   GLN   108      62.516  39.431  17.855
ATOM   1605  N   ARG   109      62.104  37.228  17.766
ATOM   1606  H   ARG   109      61.461  36.491  17.514
ATOM   1607  CA  ARG   109      63.250  36.809  18.506
ATOM   1608  HA  ARG   109      63.129  37.347  19.447
ATOM   1609  CB  ARG   109      63.118  35.290  18.813
ATOM   1610  HB2 ARG   109      62.097  34.962  19.009
ATOM   1611  HB3 ARG   109      63.474  34.686  17.979
ATOM   1612  CG  ARG   109      63.995  34.863  20.043
ATOM   1613  HG2 ARG   109      65.050  34.988  19.799
ATOM   1614  HG3 ARG   109      63.733  35.487  20.897
ATOM   1615  CD  ARG   109      63.660  33.361  20.434
ATOM   1616  HD2 ARG   109      64.121  33.269  21.418
ATOM   1617  HD3 ARG   109      62.594  33.164  20.537
ATOM   1618  NE  ARG   109      64.194  32.381  19.468
ATOM   1619  HE  ARG   109      65.197  32.292  19.549
ATOM   1620  CZ  ARG   109      63.572  31.621  18.552
ATOM   1621  NH1 ARG   109      62.235  31.624  18.379
ATOM   1622 HH11 ARG   109      61.652  32.207  18.962
ATOM   1623 HH12 ARG   109      61.790  30.895  17.842
ATOM   1624  NH2 ARG   109      64.287  30.860  17.780
ATOM   1625 HH21 ARG   109      65.269  31.001  17.587
ATOM   1626 HH22 ARG   109      63.729  30.458  17.040
ATOM   1627  C   ARG   109      64.644  37.151  17.898
ATOM   1628  O   ARG   109      65.593  37.326  18.679
ATOM   1629  N   GLN   110      64.671  37.301  16.604
ATOM   1630  H   GLN   110      63.823  37.225  16.061
ATOM   1631  CA  GLN   110      65.830  37.942  15.919
ATOM   1632  HA  GLN   110      66.762  37.487  16.257
ATOM   1633  CB  GLN   110      65.709  37.825  14.373
ATOM   1634  HB2 GLN   110      64.668  38.038  14.126
ATOM   1635  HB3 GLN   110      66.387  38.556  13.933
ATOM   1636  CG  GLN   110      66.126  36.426  13.931
ATOM   1637  HG2 GLN   110      65.565  35.694  14.512
ATOM   1638  HG3 GLN   110      65.749  36.460  12.909
ATOM   1639  CD  GLN   110      67.613  36.240  14.123
ATOM   1640  OE1 GLN   110      68.379  37.051  13.661
ATOM   1641  NE2 GLN   110      68.069  35.321  15.041
ATOM   1642 HE21 GLN   110      69.064  35.339  15.210
ATOM   1643 HE22 GLN   110      67.493  34.675  15.564
ATOM   1644  C   GLN   110      65.965  39.413  16.339
ATOM   1645  O   GLN   110      67.014  39.763  16.862
ATOM   1646  N   PHE   111      64.920  40.216  16.132
ATOM   1647  H   PHE   111      64.076  39.856  15.709
ATOM   1648  CA  PHE   111      64.993  41.635  16.548
ATOM   1649  HA  PHE   111      65.733  42.187  15.969
ATOM   1650  CB  PHE   111      63.708  42.381  16.283
ATOM   1651  HB2 PHE   111      63.014  41.909  16.979
ATOM   1652  HB3 PHE   111      63.864  43.405  16.622
ATOM   1653  CG  PHE   111      63.344  42.431  14.829
ATOM   1654  CD1 PHE   111      62.331  41.619  14.343
ATOM   1655  HD1 PHE   111      61.846  40.890  14.975
ATOM   1656  CE1 PHE   111      61.924  41.673  13.027
ATOM   1657  HE1 PHE   111      61.223  40.965  12.612
ATOM   1658  CZ  PHE   111      62.441  42.624  12.210
ATOM   1659  HZ  PHE   111      62.200  42.594  11.158
ATOM   1660  CE2 PHE   111      63.268  43.579  12.747
ATOM   1661  HE2 PHE   111      63.679  44.265  12.021
ATOM   1662  CD2 PHE   111      63.892  43.462  13.993
ATOM   1663  HD2 PHE   111      64.544  44.247  14.346
ATOM   1664  C   PHE   111      65.411  41.851  18.030
ATOM   1665  O   PHE   111      66.299  42.681  18.323
ATOM   1666  N   ARG   112      64.908  41.006  18.924
ATOM   1667  H   ARG   112      64.166  40.383  18.639
ATOM   1668  CA  ARG   112      65.217  40.858  20.335
ATOM   1669  HA  ARG   112      64.932  41.771  20.858
ATOM   1670  CB  ARG   112      64.417  39.692  20.929
ATOM   1671  HB2 ARG   112      64.471  38.814  20.287
ATOM   1672  HB3 ARG   112      64.750  39.548  21.957
ATOM   1673  CG  ARG   112      62.947  40.195  21.199
ATOM   1674  HG2 ARG   112      62.995  41.167  21.691
ATOM   1675  HG3 ARG   112      62.401  40.382  20.275
ATOM   1676  CD  ARG   112      62.090  39.145  21.979
ATOM   1677  HD2 ARG   112      61.024  39.369  21.928
ATOM   1678  HD3 ARG   112      62.238  38.179  21.497
ATOM   1679  NE  ARG   112      62.547  39.079  23.375
ATOM   1680  HE  ARG   112      63.325  38.460  23.553
ATOM   1681  CZ  ARG   112      62.264  39.828  24.416
ATOM   1682  NH1 ARG   112      61.480  40.905  24.300
ATOM   1683 HH11 ARG   112      61.163  41.195  23.387
ATOM   1684 HH12 ARG   112      60.995  41.136  25.157
ATOM   1685  NH2 ARG   112      62.700  39.600  25.582
ATOM   1686 HH21 ARG   112      63.201  38.747  25.782
ATOM   1687 HH22 ARG   112      62.583  40.280  26.320
ATOM   1688  C   ARG   112      66.682  40.633  20.606
ATOM   1689  O   ARG   112      67.235  41.292  21.464
ATOM   1690  N   ALA   113      67.322  39.767  19.795
ATOM   1691  H   ALA   113      66.788  39.212  19.142
ATOM   1692  CA  ALA   113      68.794  39.554  19.940
ATOM   1693  HA  ALA   113      69.051  39.489  20.997
ATOM   1694  CB  ALA   113      69.123  38.253  19.258
ATOM   1695  HB1 ALA   113      70.202  38.106  19.311
ATOM   1696  HB2 ALA   113      68.668  37.414  19.784
ATOM   1697  HB3 ALA   113      68.823  38.303  18.211
ATOM   1698  C   ALA   113      69.611  40.745  19.409
ATOM   1699  O   ALA   113      70.606  41.215  20.014
ATOM   1700  N   LEU   114      69.210  41.388  18.269
ATOM   1701  H   LEU   114      68.313  41.100  17.907
ATOM   1702  CA  LEU   114      69.845  42.660  17.826
ATOM   1703  HA  LEU   114      70.912  42.468  17.715
ATOM   1704  CB  LEU   114      69.192  43.093  16.506
ATOM   1705  HB2 LEU   114      69.539  42.322  15.818
ATOM   1706  HB3 LEU   114      68.116  42.952  16.608
ATOM   1707  CG  LEU   114      69.562  44.430  15.841
ATOM   1708  HG  LEU   114      68.992  45.183  16.385
ATOM   1709  CD1 LEU   114      71.049  44.664  15.759
ATOM   1710 HD11 LEU   114      71.295  45.522  15.134
ATOM   1711 HD12 LEU   114      71.375  44.682  16.799
ATOM   1712 HD13 LEU   114      71.531  43.769  15.366
ATOM   1713  CD2 LEU   114      69.047  44.392  14.378
ATOM   1714 HD21 LEU   114      68.030  44.001  14.361
ATOM   1715 HD22 LEU   114      68.807  45.401  14.041
ATOM   1716 HD23 LEU   114      69.644  43.743  13.738
ATOM   1717  C   LEU   114      69.673  43.726  18.907
ATOM   1718  O   LEU   114      70.619  44.174  19.452
ATOM   1719  N   ALA   115      68.471  44.064  19.322
ATOM   1720  H   ALA   115      67.678  43.629  18.873
ATOM   1721  CA  ALA   115      68.198  44.870  20.497
ATOM   1722  HA  ALA   115      68.233  45.923  20.218
ATOM   1723  CB  ALA   115      66.636  44.752  20.710
ATOM   1724  HB1 ALA   115      66.292  45.462  21.463
ATOM   1725  HB2 ALA   115      66.144  44.930  19.755
ATOM   1726  HB3 ALA   115      66.306  43.797  21.120
ATOM   1727  C   ALA   115      69.063  44.570  21.717
ATOM   1728  O   ALA   115      69.742  45.475  22.204
ATOM   1729  N   ASN   116      69.144  43.278  22.155
ATOM   1730  H   ASN   116      68.571  42.558  21.739
ATOM   1731  CA  ASN   116      70.018  42.716  23.181
ATOM   1732  HA  ASN   116      69.769  43.175  24.138
ATOM   1733  CB  ASN   116      69.894  41.253  23.252
ATOM   1734  HB2 ASN   116      68.874  40.870  23.236
ATOM   1735  HB3 ASN   116      70.450  40.847  22.407
ATOM   1736  CG  ASN   116      70.518  40.671  24.548
ATOM   1737  OD1 ASN   116      70.678  41.365  25.575
ATOM   1738  ND2 ASN   116      70.976  39.450  24.413
ATOM   1739 HD21 ASN   116      71.404  38.999  25.210
ATOM   1740 HD22 ASN   116      71.148  39.052  23.502
ATOM   1741  C   ASN   116      71.521  43.195  23.004
ATOM   1742  O   ASN   116      72.172  43.613  23.970
ATOM   1743  N   GLN   117      72.013  43.210  21.791
ATOM   1744  H   GLN   117      71.384  42.993  21.031
ATOM   1745  CA  GLN   117      73.362  43.671  21.380
ATOM   1746  HA  GLN   117      74.025  43.408  22.204
ATOM   1747  CB  GLN   117      73.763  43.051  19.997
ATOM   1748  HB2 GLN   117      73.013  43.328  19.257
ATOM   1749  HB3 GLN   117      74.683  43.506  19.627
ATOM   1750  CG  GLN   117      73.940  41.487  20.211
ATOM   1751  HG2 GLN   117      73.229  41.192  20.984
ATOM   1752  HG3 GLN   117      73.745  41.053  19.231
ATOM   1753  CD  GLN   117      75.284  41.035  20.762
ATOM   1754  OE1 GLN   117      75.488  40.761  21.960
ATOM   1755  NE2 GLN   117      76.282  40.969  19.910
ATOM   1756 HE21 GLN   117      77.107  40.467  20.207
ATOM   1757 HE22 GLN   117      76.119  41.209  18.942
ATOM   1758  C   GLN   117      73.465  45.182  21.151
ATOM   1759  O   GLN   117      74.538  45.735  21.411
ATOM   1760  N   VAL   118      72.395  45.865  20.638
ATOM   1761  H   VAL   118      71.626  45.216  20.546
ATOM   1762  CA  VAL   118      72.166  47.398  20.598
ATOM   1763  HA  VAL   118      72.912  47.833  19.933
ATOM   1764  CB  VAL   118      70.752  47.745  20.062
ATOM   1765  HB  VAL   118      69.976  47.310  20.691
ATOM   1766  CG1 VAL   118      70.540  49.286  20.103
ATOM   1767 HG11 VAL   118      69.555  49.560  19.726
ATOM   1768 HG12 VAL   118      70.583  49.621  21.141
ATOM   1769 HG13 VAL   118      71.357  49.686  19.503
ATOM   1770  CG2 VAL   118      70.542  47.330  18.589
ATOM   1771 HG21 VAL   118      70.968  46.329  18.517
ATOM   1772 HG22 VAL   118      69.502  47.203  18.288
ATOM   1773 HG23 VAL   118      71.029  48.009  17.888
ATOM   1774  C   VAL   118      72.377  47.840  22.069
ATOM   1775  O   VAL   118      73.257  48.664  22.278
ATOM   1776  N   VAL   119      71.732  47.226  23.045
ATOM   1777  H   VAL   119      71.000  46.569  22.814
ATOM   1778  CA  VAL   119      72.013  47.454  24.374
ATOM   1779  HA  VAL   119      72.301  48.505  24.366
ATOM   1780  CB  VAL   119      70.833  47.335  25.368
ATOM   1781  HB  VAL   119      71.223  47.685  26.322
ATOM   1782  CG1 VAL   119      69.742  48.282  24.802
ATOM   1783 HG11 VAL   119      70.178  49.268  24.646
ATOM   1784 HG12 VAL   119      69.385  47.899  23.846
ATOM   1785 HG13 VAL   119      68.925  48.469  25.499
ATOM   1786  CG2 VAL   119      70.348  45.969  25.586
ATOM   1787 HG21 VAL   119      69.505  46.011  26.278
ATOM   1788 HG22 VAL   119      70.199  45.414  24.661
ATOM   1789 HG23 VAL   119      71.095  45.325  26.050
ATOM   1790  C   VAL   119      73.263  46.746  24.999
ATOM   1791  O   VAL   119      73.316  46.474  26.175
ATOM   1792  N   GLY   120      74.266  46.359  24.248
ATOM   1793  H   GLY   120      74.182  46.531  23.257
ATOM   1794  CA  GLY   120      75.481  45.759  24.742
ATOM   1795  HA2 GLY   120      75.290  44.919  25.412
ATOM   1796  HA3 GLY   120      76.074  45.415  23.896
ATOM   1797  C   GLY   120      76.458  46.714  25.515
ATOM   1798  O   GLY   120      76.741  47.839  25.078
ATOM   1799  N   MET   121      76.948  46.280  26.642
ATOM   1800  H   MET   121      76.591  45.399  26.984
ATOM   1801  CA  MET   121      77.902  47.121  27.410
ATOM   1802  HA  MET   121      77.493  48.132  27.416
ATOM   1803  CB  MET   121      77.880  46.708  28.893
ATOM   1804  HB2 MET   121      78.270  45.701  29.033
ATOM   1805  HB3 MET   121      78.484  47.386  29.497
ATOM   1806  CG  MET   121      76.371  46.665  29.454
ATOM   1807  HG2 MET   121      75.730  47.529  29.280
ATOM   1808  HG3 MET   121      75.938  45.782  28.984
ATOM   1809  SD  MET   121      76.270  46.312  31.213
ATOM   1810  CE  MET   121      76.609  44.514  31.457
ATOM   1811  HE1 MET   121      77.592  44.250  31.068
ATOM   1812  HE2 MET   121      76.599  44.260  32.517
ATOM   1813  HE3 MET   121      75.829  43.869  31.052
ATOM   1814  C   MET   121      79.340  47.352  26.889
ATOM   1815  O   MET   121      79.896  48.440  27.153
ATOM   1816  N   PRO   122      80.007  46.535  26.051
ATOM   1817  CD  PRO   122      79.555  45.251  25.512
ATOM   1818  HD2 PRO   122      78.784  45.597  24.823
ATOM   1819  HD3 PRO   122      79.144  44.576  26.263
ATOM   1820  CG  PRO   122      80.759  44.625  24.827
ATOM   1821  HG2 PRO   122      80.486  44.014  23.965
ATOM   1822  HG3 PRO   122      81.311  44.051  25.570
ATOM   1823  CB  PRO   122      81.632  45.789  24.453
ATOM   1824  HB2 PRO   122      81.283  46.054  23.454
ATOM   1825  HB3 PRO   122      82.688  45.525  24.482
ATOM   1826  CA  PRO   122      81.326  46.862  25.489
ATOM   1827  HA  PRO   122      82.085  46.602  26.226
ATOM   1828  C   PRO   122      81.487  48.280  24.867
ATOM   1829  O   PRO   122      82.458  48.921  25.121
ATOM   1830  N   VAL   123      80.453  48.783  24.171
ATOM   1831  H   VAL   123      79.706  48.148  23.930
ATOM   1832  CA  VAL   123      80.586  50.164  23.636
ATOM   1833  HA  VAL   123      81.506  50.162  23.051
ATOM   1834  CB  VAL   123      79.544  50.443  22.448
ATOM   1835  HB  VAL   123      79.585  49.596  21.763
ATOM   1836  CG1 VAL   123      78.052  50.580  22.934
ATOM   1837 HG11 VAL   123      77.751  49.775  23.605
ATOM   1838 HG12 VAL   123      77.953  51.533  23.453
ATOM   1839 HG13 VAL   123      77.360  50.556  22.092
ATOM   1840  CG2 VAL   123      79.792  51.627  21.577
ATOM   1841 HG21 VAL   123      79.291  51.526  20.614
ATOM   1842 HG22 VAL   123      79.642  52.573  22.096
ATOM   1843 HG23 VAL   123      80.851  51.576  21.322
ATOM   1844  C   VAL   123      80.619  51.272  24.652
ATOM   1845  O   VAL   123      80.931  52.396  24.260
ATOM   1846  N   VAL   124      80.066  51.085  25.868
ATOM   1847  H   VAL   124      79.726  50.151  26.046
ATOM   1848  CA  VAL   124      80.121  52.036  26.964
ATOM   1849  HA  VAL   124      80.398  52.972  26.479
ATOM   1850  CB  VAL   124      78.725  52.194  27.655
ATOM   1851  HB  VAL   124      78.830  52.837  28.528
ATOM   1852  CG1 VAL   124      77.841  52.918  26.683
ATOM   1853 HG11 VAL   124      77.549  52.208  25.909
ATOM   1854 HG12 VAL   124      76.968  53.255  27.242
ATOM   1855 HG13 VAL   124      78.331  53.792  26.253
ATOM   1856  CG2 VAL   124      78.150  50.925  28.202
ATOM   1857 HG21 VAL   124      77.192  51.122  28.683
ATOM   1858 HG22 VAL   124      78.113  50.148  27.439
ATOM   1859 HG23 VAL   124      78.733  50.599  29.064
ATOM   1860  C   VAL   124      81.188  51.740  28.032
ATOM   1861  O   VAL   124      81.503  52.558  28.885
ATOM   1862  N   ASP   125      81.789  50.512  27.997
ATOM   1863  H   ASP   125      81.341  49.826  27.406
ATOM   1864  CA  ASP   125      82.638  49.881  28.977
ATOM   1865  HA  ASP   125      82.362  50.208  29.980
ATOM   1866  CB  ASP   125      82.431  48.376  28.935
ATOM   1867  HB2 ASP   125      81.408  48.196  29.263
ATOM   1868  HB3 ASP   125      82.489  48.016  27.908
ATOM   1869  CG  ASP   125      83.447  47.624  29.738
ATOM   1870  OD1 ASP   125      84.450  47.191  29.116
ATOM   1871  OD2 ASP   125      83.283  47.541  31.006
ATOM   1872  C   ASP   125      84.064  50.325  28.851
ATOM   1873  O   ASP   125      84.767  50.541  29.847
ATOM   1874  N   LYS   126      84.424  50.704  27.587
ATOM   1875  H   LYS   126      83.740  50.607  26.851
ATOM   1876  CA  LYS   126      85.573  51.616  27.331
ATOM   1877  HA  LYS   126      86.486  51.144  27.695
ATOM   1878  CB  LYS   126      85.708  51.864  25.801
ATOM   1879  HB2 LYS   126      85.673  50.858  25.382
ATOM   1880  HB3 LYS   126      84.862  52.422  25.399
ATOM   1881  CG  LYS   126      87.013  52.430  25.399
ATOM   1882  HG2 LYS   126      87.034  52.482  24.310
ATOM   1883  HG3 LYS   126      87.002  53.483  25.679
ATOM   1884  CD  LYS   126      88.201  51.653  25.869
ATOM   1885  HD2 LYS   126      88.257  51.609  26.958
ATOM   1886  HD3 LYS   126      88.225  50.646  25.452
ATOM   1887  CE  LYS   126      89.491  52.368  25.486
ATOM   1888  HE2 LYS   126      89.522  52.546  24.411
ATOM   1889  HE3 LYS   126      89.408  53.288  26.062
ATOM   1890  NZ  LYS   126      90.630  51.511  25.965
ATOM   1891  HZ1 LYS   126      90.565  51.351  26.959
ATOM   1892  HZ2 LYS   126      90.609  50.561  25.624
ATOM   1893  HZ3 LYS   126      91.513  51.994  25.867
ATOM   1894  C   LYS   126      85.520  52.944  28.140
ATOM   1895  O   LYS   126      86.516  53.535  28.465
ATOM   1896  N   LEU   127      84.333  53.408  28.377
ATOM   1897  H   LEU   127      83.614  52.843  27.948
ATOM   1898  CA  LEU   127      83.918  54.695  28.950
ATOM   1899  HA  LEU   127      84.827  55.292  28.858
ATOM   1900  CB  LEU   127      82.853  55.384  28.047
ATOM   1901  HB2 LEU   127      81.872  55.052  28.390
ATOM   1902  HB3 LEU   127      82.828  56.448  28.277
ATOM   1903  CG  LEU   127      82.940  55.318  26.529
ATOM   1904  HG  LEU   127      82.797  54.269  26.273
ATOM   1905  CD1 LEU   127      81.863  56.220  25.918
ATOM   1906 HD11 LEU   127      82.071  57.227  26.280
ATOM   1907 HD12 LEU   127      81.924  56.223  24.831
ATOM   1908 HD13 LEU   127      80.875  55.784  26.061
ATOM   1909  CD2 LEU   127      84.392  55.602  26.007
ATOM   1910 HD21 LEU   127      85.065  54.750  26.111
ATOM   1911 HD22 LEU   127      84.416  55.839  24.944
ATOM   1912 HD23 LEU   127      84.853  56.458  26.502
ATOM   1913  C   LEU   127      83.643  54.681  30.497
ATOM   1914  O   LEU   127      83.233  55.673  30.991
ATOM   1915  N   GLU   128      83.768  53.567  31.222
ATOM   1916  H   GLU   128      84.068  52.743  30.721
ATOM   1917  CA  GLU   128      83.370  53.414  32.629
ATOM   1918  HA  GLU   128      82.281  53.443  32.617
ATOM   1919  CB  GLU   128      83.828  52.057  33.156
ATOM   1920  HB2 GLU   128      83.566  51.226  32.501
ATOM   1921  HB3 GLU   128      84.909  52.120  33.283
ATOM   1922  CG  GLU   128      83.256  51.692  34.504
ATOM   1923  HG2 GLU   128      83.516  52.442  35.251
ATOM   1924  HG3 GLU   128      82.183  51.509  34.474
ATOM   1925  CD  GLU   128      83.954  50.459  35.000
ATOM   1926  OE1 GLU   128      84.815  50.561  35.943
ATOM   1927  OE2 GLU   128      83.649  49.368  34.412
ATOM   1928  C   GLU   128      83.868  54.541  33.576
ATOM   1929  O   GLU   128      83.089  55.145  34.287
ATOM   1930  N   ASN   129      85.168  54.943  33.458
ATOM   1931  H   ASN   129      85.736  54.468  32.770
ATOM   1932  CA  ASN   129      85.784  56.033  34.198
ATOM   1933  HA  ASN   129      85.395  55.953  35.212
ATOM   1934  CB  ASN   129      87.344  55.983  34.185
ATOM   1935  HB2 ASN   129      87.729  54.969  34.283
ATOM   1936  HB3 ASN   129      87.687  56.325  33.209
ATOM   1937  CG  ASN   129      88.036  56.764  35.254
ATOM   1938  OD1 ASN   129      87.474  57.423  36.143
ATOM   1939  ND2 ASN   129      89.335  56.603  35.346
ATOM   1940 HD21 ASN   129      89.866  57.073  36.066
ATOM   1941 HD22 ASN   129      89.874  56.172  34.608
ATOM   1942  C   ASN   129      85.230  57.364  33.649
ATOM   1943  O   ASN   129      85.099  58.309  34.468
ATOM   1944  N   ARG   130      85.021  57.530  32.332
ATOM   1945  H   ARG   130      85.305  56.771  31.731
ATOM   1946  CA  ARG   130      84.304  58.695  31.820
ATOM   1947  HA  ARG   130      84.919  59.568  32.034
ATOM   1948  CB  ARG   130      84.361  58.724  30.230
ATOM   1949  HB2 ARG   130      84.257  57.689  29.902
ATOM   1950  HB3 ARG   130      83.557  59.341  29.829
ATOM   1951  CG  ARG   130      85.673  59.264  29.661
ATOM   1952  HG2 ARG   130      85.671  60.336  29.860
ATOM   1953  HG3 ARG   130      86.402  58.736  30.277
ATOM   1954  CD  ARG   130      85.868  58.993  28.132
ATOM   1955  HD2 ARG   130      86.692  59.625  27.802
ATOM   1956  HD3 ARG   130      86.046  57.933  27.951
ATOM   1957  NE  ARG   130      84.651  59.467  27.432
ATOM   1958  HE  ARG   130      83.989  59.991  27.987
ATOM   1959  CZ  ARG   130      84.386  59.458  26.118
ATOM   1960  NH1 ARG   130      83.249  60.017  25.783
ATOM   1961 HH11 ARG   130      82.679  60.464  26.487
ATOM   1962 HH12 ARG   130      82.960  60.035  24.815
ATOM   1963  NH2 ARG   130      85.035  58.928  25.129
ATOM   1964 HH21 ARG   130      85.889  58.414  25.290
ATOM   1965 HH22 ARG   130      84.646  59.108  24.213
ATOM   1966  C   ARG   130      82.852  58.837  32.377
ATOM   1967  O   ARG   130      82.517  59.971  32.732
ATOM   1968  N   ILE   131      82.151  57.728  32.596
ATOM   1969  H   ILE   131      82.587  56.887  32.246
ATOM   1970  CA  ILE   131      80.761  57.697  33.078
ATOM   1971  HA  ILE   131      80.198  58.482  32.572
ATOM   1972  CB  ILE   131      80.121  56.357  32.570
ATOM   1973  HB  ILE   131      80.863  55.630  32.897
ATOM   1974  CG2 ILE   131      78.740  56.324  33.282
ATOM   1975 HG21 ILE   131      78.365  57.347  33.324
ATOM   1976 HG22 ILE   131      78.019  55.726  32.723
ATOM   1977 HG23 ILE   131      78.935  55.978  34.296
ATOM   1978  CG1 ILE   131      79.899  56.427  31.050
ATOM   1979 HG12 ILE   131      79.066  57.101  30.851
ATOM   1980 HG13 ILE   131      80.785  56.783  30.524
ATOM   1981  CD1 ILE   131      79.635  54.946  30.573
ATOM   1982 HD11 ILE   131      79.432  54.848  29.506
ATOM   1983 HD12 ILE   131      80.459  54.265  30.788
ATOM   1984 HD13 ILE   131      78.810  54.509  31.134
ATOM   1985  C   ILE   131      80.813  57.897  34.623
ATOM   1986  O   ILE   131      80.003  58.716  35.130
ATOM   1987  N   GLN   132      81.842  57.406  35.221
ATOM   1988  H   GLN   132      82.365  56.673  34.765
ATOM   1989  CA  GLN   132      82.033  57.673  36.650
ATOM   1990  HA  GLN   132      81.074  57.526  37.147
ATOM   1991  CB  GLN   132      83.132  56.735  37.145
ATOM   1992  HB2 GLN   132      82.924  55.724  36.794
ATOM   1993  HB3 GLN   132      84.078  57.119  36.764
ATOM   1994  CG  GLN   132      83.177  56.618  38.643
ATOM   1995  HG2 GLN   132      83.314  57.638  39.003
ATOM   1996  HG3 GLN   132      82.327  56.103  39.092
ATOM   1997  CD  GLN   132      84.340  55.861  39.109
ATOM   1998  OE1 GLN   132      85.445  55.925  38.541
ATOM   1999  NE2 GLN   132      84.312  55.265  40.282
ATOM   2000 HE21 GLN   132      85.147  54.858  40.679
ATOM   2001 HE22 GLN   132      83.516  55.433  40.880
ATOM   2002  C   GLN   132      82.431  59.176  36.891
ATOM   2003  O   GLN   132      81.945  59.767  37.840
ATOM   2004  N   GLU   133      83.149  59.831  36.036
ATOM   2005  H   GLU   133      83.673  59.261  35.387
ATOM   2006  CA  GLU   133      83.403  61.247  35.933
ATOM   2007  HA  GLU   133      83.736  61.587  36.915
ATOM   2008  CB  GLU   133      84.530  61.500  34.894
ATOM   2009  HB2 GLU   133      85.477  61.108  35.264
ATOM   2010  HB3 GLU   133      84.265  61.013  33.955
ATOM   2011  CG  GLU   133      84.696  62.997  34.625
ATOM   2012  HG2 GLU   133      83.741  63.451  34.363
ATOM   2013  HG3 GLU   133      85.001  63.482  35.553
ATOM   2014  CD  GLU   133      85.783  63.209  33.618
ATOM   2015  OE1 GLU   133      85.680  62.822  32.428
ATOM   2016  OE2 GLU   133      86.821  63.762  34.077
ATOM   2017  C   GLU   133      82.107  62.054  35.709
ATOM   2018  O   GLU   133      81.849  63.132  36.260
ATOM   2019  N   LEU   134      81.260  61.620  34.778
ATOM   2020  H   LEU   134      81.553  60.708  34.460
ATOM   2021  CA  LEU   134      79.933  62.141  34.471
ATOM   2022  HA  LEU   134      80.111  63.109  34.000
ATOM   2023  CB  LEU   134      79.266  61.345  33.327
ATOM   2024  HB2 LEU   134      80.071  61.179  32.611
ATOM   2025  HB3 LEU   134      79.104  60.352  33.742
ATOM   2026  CG  LEU   134      78.011  61.717  32.568
ATOM   2027  HG  LEU   134      77.183  61.470  33.231
ATOM   2028  CD1 LEU   134      77.900  63.129  32.204
ATOM   2029 HD11 LEU   134      78.786  63.460  31.661
ATOM   2030 HD12 LEU   134      77.064  63.275  31.520
ATOM   2031 HD13 LEU   134      77.727  63.748  33.084
ATOM   2032  CD2 LEU   134      77.956  60.919  31.257
ATOM   2033 HD21 LEU   134      78.483  61.429  30.450
ATOM   2034 HD22 LEU   134      78.365  59.926  31.437
ATOM   2035 HD23 LEU   134      76.896  60.886  31.004
ATOM   2036  C   LEU   134      79.008  62.311  35.727
ATOM   2037  O   LEU   134      78.718  63.458  35.998
ATOM   2038  N   ALA   135      78.920  61.293  36.616
ATOM   2039  H   ALA   135      79.397  60.445  36.349
ATOM   2040  CA  ALA   135      78.307  61.383  37.926
ATOM   2041  HA  ALA   135      77.276  61.677  37.729
ATOM   2042  CB  ALA   135      78.362  60.007  38.471
ATOM   2043  HB1 ALA   135      77.435  59.447  38.347
ATOM   2044  HB2 ALA   135      79.299  59.526  38.194
ATOM   2045  HB3 ALA   135      78.339  60.177  39.547
ATOM   2046  C   ALA   135      78.947  62.444  38.810
ATOM   2047  O   ALA   135      78.328  63.414  39.300
ATOM   2048  N   CYS   136      80.288  62.373  39.051
ATOM   2049  H   CYS   136      80.816  61.611  38.647
ATOM   2050  CA  CYS   136      81.071  63.366  39.766
ATOM   2051  HA  CYS   136      80.738  63.429  40.801
ATOM   2052  CB  CYS   136      82.508  62.981  39.859
ATOM   2053  HB2 CYS   136      82.570  61.978  40.282
ATOM   2054  HB3 CYS   136      82.977  62.953  38.876
ATOM   2055  SG  CYS   136      83.410  64.143  40.965
ATOM   2056  HG  CYS   136      83.094  65.251  40.287
ATOM   2057  C   CYS   136      80.919  64.793  39.231
ATOM   2058  O   CYS   136      80.392  65.676  39.913
ATOM   2059  N   SER   137      81.042  64.972  37.947
ATOM   2060  H   SER   137      81.424  64.214  37.400
ATOM   2061  CA  SER   137      80.679  66.210  37.252
ATOM   2062  HA  SER   137      81.405  66.954  37.580
ATOM   2063  CB  SER   137      80.838  66.044  35.748
ATOM   2064  HB2 SER   137      80.125  65.345  35.309
ATOM   2065  HB3 SER   137      80.779  66.999  35.226
ATOM   2066  OG  SER   137      82.067  65.445  35.346
ATOM   2067  HG  SER   137      81.999  64.558  35.706
ATOM   2068  C   SER   137      79.350  66.853  37.604
ATOM   2069  O   SER   137      79.248  68.072  37.785
ATOM   2070  N   LEU   138      78.344  66.038  37.689
ATOM   2071  H   LEU   138      78.475  65.049  37.530
ATOM   2072  CA  LEU   138      76.981  66.507  38.023
ATOM   2073  HA  LEU   138      76.863  67.476  37.538
ATOM   2074  CB  LEU   138      76.007  65.535  37.428
ATOM   2075  HB2 LEU   138      76.176  64.560  37.884
ATOM   2076  HB3 LEU   138      75.015  65.947  37.614
ATOM   2077  CG  LEU   138      75.886  65.538  35.864
ATOM   2078  HG  LEU   138      76.912  65.625  35.504
ATOM   2079  CD1 LEU   138      75.267  64.102  35.420
ATOM   2080 HD11 LEU   138      74.207  63.988  35.651
ATOM   2081 HD12 LEU   138      75.322  64.090  34.331
ATOM   2082 HD13 LEU   138      75.830  63.263  35.829
ATOM   2083  CD2 LEU   138      75.163  66.755  35.228
ATOM   2084 HD21 LEU   138      74.113  66.814  35.518
ATOM   2085 HD22 LEU   138      75.685  67.697  35.388
ATOM   2086 HD23 LEU   138      75.033  66.614  34.155
ATOM   2087  C   LEU   138      76.704  66.725  39.486
ATOM   2088  O   LEU   138      76.009  67.705  39.837
ATOM   2089  N   ILE   139      77.189  65.838  40.411
ATOM   2090  H   ILE   139      77.531  64.960  40.049
ATOM   2091  CA  ILE   139      77.160  66.079  41.871
ATOM   2092  HA  ILE   139      76.110  66.247  42.110
ATOM   2093  CB  ILE   139      77.514  64.744  42.585
ATOM   2094  HB  ILE   139      78.456  64.413  42.146
ATOM   2095  CG2 ILE   139      77.665  64.905  44.104
ATOM   2096 HG21 ILE   139      78.584  65.458  44.302
ATOM   2097 HG22 ILE   139      76.854  65.472  44.563
ATOM   2098 HG23 ILE   139      77.874  64.030  44.720
ATOM   2099  CG1 ILE   139      76.511  63.634  42.305
ATOM   2100 HG12 ILE   139      75.725  63.599  43.060
ATOM   2101 HG13 ILE   139      76.065  63.744  41.316
ATOM   2102  CD1 ILE   139      77.171  62.253  42.197
ATOM   2103 HD11 ILE   139      76.355  61.555  42.382
ATOM   2104 HD12 ILE   139      77.725  62.006  41.291
ATOM   2105 HD13 ILE   139      77.762  62.090  43.098
ATOM   2106  C   ILE   139      78.074  67.181  42.289
ATOM   2107  O   ILE   139      77.737  68.063  43.064
ATOM   2108  N   GLU   140      79.284  67.317  41.720
ATOM   2109  H   GLU   140      79.550  66.576  41.088
ATOM   2110  CA  GLU   140      80.287  68.311  42.086
ATOM   2111  HA  GLU   140      80.480  68.359  43.158
ATOM   2112  CB  GLU   140      81.687  67.976  41.507
ATOM   2113  HB2 GLU   140      81.847  66.898  41.521
ATOM   2114  HB3 GLU   140      81.720  68.239  40.450
ATOM   2115  CG  GLU   140      82.921  68.583  42.183
ATOM   2116  HG2 GLU   140      83.860  68.303  41.705
ATOM   2117  HG3 GLU   140      82.849  69.663  42.062
ATOM   2118  CD  GLU   140      83.084  68.236  43.692
ATOM   2119  OE1 GLU   140      83.735  69.012  44.409
ATOM   2120  OE2 GLU   140      82.555  67.223  44.149
ATOM   2121  C   GLU   140      79.926  69.758  41.628
ATOM   2122  O   GLU   140      80.230  70.785  42.243
ATOM   2123  N   SER   141      78.980  69.943  40.702
ATOM   2124  H   SER   141      78.730  69.078  40.243
ATOM   2125  CA  SER   141      78.217  71.097  40.472
ATOM   2126  HA  SER   141      78.898  71.948  40.524
ATOM   2127  CB  SER   141      77.628  70.976  39.062
ATOM   2128  HB2 SER   141      78.360  70.566  38.366
ATOM   2129  HB3 SER   141      76.812  70.257  39.136
ATOM   2130  OG  SER   141      77.184  72.297  38.675
ATOM   2131  HG  SER   141      76.225  72.352  38.686
ATOM   2132  C   SER   141      77.122  71.481  41.479
ATOM   2133  O   SER   141      76.617  72.655  41.533
ATOM   2134  N   LEU   142      76.832  70.577  42.437
ATOM   2135  H   LEU   142      77.268  69.667  42.389
ATOM   2136  CA  LEU   142      75.757  70.784  43.418
ATOM   2137  HA  LEU   142      75.205  71.709  43.250
ATOM   2138  CB  LEU   142      74.770  69.600  43.325
ATOM   2139  HB2 LEU   142      75.281  68.725  43.726
ATOM   2140  HB3 LEU   142      73.908  69.940  43.899
ATOM   2141  CG  LEU   142      74.219  69.270  41.956
ATOM   2142  HG  LEU   142      75.068  68.906  41.378
ATOM   2143  CD1 LEU   142      73.230  68.105  42.094
ATOM   2144 HD11 LEU   142      73.098  67.654  41.111
ATOM   2145 HD12 LEU   142      73.600  67.355  42.794
ATOM   2146 HD13 LEU   142      72.240  68.378  42.460
ATOM   2147  CD2 LEU   142      73.579  70.457  41.234
ATOM   2148 HD21 LEU   142      73.123  70.106  40.308
ATOM   2149 HD22 LEU   142      72.778  70.943  41.792
ATOM   2150 HD23 LEU   142      74.380  71.147  40.965
ATOM   2151  C   LEU   142      76.385  70.863  44.815
ATOM   2152  O   LEU   142      75.975  71.654  45.679
ATOM   2153  N   ARG   143      77.355  70.001  45.125
ATOM   2154  H   ARG   143      77.690  69.442  44.353
ATOM   2155  CA  ARG   143      77.878  69.669  46.434
ATOM   2156  HA  ARG   143      77.075  69.116  46.921
ATOM   2157  CB  ARG   143      79.004  68.664  46.167
ATOM   2158  HB2 ARG   143      78.652  67.995  45.381
ATOM   2159  HB3 ARG   143      79.862  69.038  45.609
ATOM   2160  CG  ARG   143      79.456  67.969  47.481
ATOM   2161  HG2 ARG   143      79.961  68.734  48.070
ATOM   2162  HG3 ARG   143      78.714  67.690  48.231
ATOM   2163  CD  ARG   143      80.403  66.861  46.989
ATOM   2164  HD2 ARG   143      80.328  66.132  47.796
ATOM   2165  HD3 ARG   143      79.929  66.405  46.121
ATOM   2166  NE  ARG   143      81.823  67.347  46.745
ATOM   2167  HE  ARG   143      82.160  67.296  45.794
ATOM   2168  CZ  ARG   143      82.752  67.801  47.578
ATOM   2169  NH1 ARG   143      82.612  67.964  48.894
ATOM   2170 HH11 ARG   143      81.792  67.694  49.419
ATOM   2171 HH12 ARG   143      83.327  68.487  49.381
ATOM   2172  NH2 ARG   143      83.924  68.187  47.012
ATOM   2173 HH21 ARG   143      83.984  68.373  46.020
ATOM   2174 HH22 ARG   143      84.612  68.609  47.619
ATOM   2175  C   ARG   143      78.179  70.813  47.430
ATOM   2176  O   ARG   143      77.577  70.845  48.537
ATOM   2177  N   PRO   144      79.019  71.879  47.024
ATOM   2178  CD  PRO   144      79.567  72.115  45.732
ATOM   2179  HD2 PRO   144      78.750  72.072  45.011
ATOM   2180  HD3 PRO   144      80.319  71.359  45.506
ATOM   2181  CG  PRO   144      80.234  73.481  45.844
ATOM   2182  HG2 PRO   144      79.744  74.318  45.347
ATOM   2183  HG3 PRO   144      81.194  73.367  45.341
ATOM   2184  CB  PRO   144      80.373  73.734  47.311
ATOM   2185  HB2 PRO   144      80.349  74.783  47.609
ATOM   2186  HB3 PRO   144      81.341  73.314  47.583
ATOM   2187  CA  PRO   144      79.224  73.017  47.953
ATOM   2188  HA  PRO   144      79.505  72.646  48.938
ATOM   2189  C   PRO   144      77.990  74.008  48.096
ATOM   2190  O   PRO   144      77.941  74.795  49.059
ATOM   2191  N   GLN   145      76.968  73.872  47.257
ATOM   2192  H   GLN   145      76.913  73.158  46.544
ATOM   2193  CA  GLN   145      75.845  74.764  47.210
ATOM   2194  HA  GLN   145      76.237  75.744  47.481
ATOM   2195  CB  GLN   145      75.186  74.897  45.789
ATOM   2196  HB2 GLN   145      74.506  74.059  45.636
ATOM   2197  HB3 GLN   145      74.543  75.777  45.783
ATOM   2198  CG  GLN   145      76.163  74.912  44.580
ATOM   2199  HG2 GLN   145      76.770  74.012  44.684
ATOM   2200  HG3 GLN   145      75.638  75.055  43.636
ATOM   2201  CD  GLN   145      77.228  75.963  44.641
ATOM   2202  OE1 GLN   145      77.341  76.824  45.540
ATOM   2203  NE2 GLN   145      78.083  76.042  43.628
ATOM   2204 HE21 GLN   145      78.825  76.722  43.705
ATOM   2205 HE22 GLN   145      78.057  75.492  42.781
ATOM   2206  C   GLN   145      74.769  74.534  48.326
ATOM   2207  O   GLN   145      73.962  75.417  48.481
ATOM   2208  N   GLY   146      74.840  73.385  49.030
ATOM   2209  H   GLY   146      75.639  72.783  48.888
ATOM   2210  CA  GLY   146      73.898  73.121  50.084
ATOM   2211  HA2 GLY   146      74.235  72.226  50.608
ATOM   2212  HA3 GLY   146      73.785  73.904  50.833
ATOM   2213  C   GLY   146      72.441  72.808  49.616
ATOM   2214  O   GLY   146      71.530  72.661  50.453
ATOM   2215  N   GLN   147      72.264  72.607  48.361
ATOM   2216  H   GLN   147      73.087  72.598  47.776
ATOM   2217  CA  GLN   147      70.983  72.247  47.772
ATOM   2218  HA  GLN   147      70.580  71.446  48.393
ATOM   2219  CB  GLN   147      70.024  73.530  47.789
ATOM   2220  HB2 GLN   147      69.016  73.168  47.583
ATOM   2221  HB3 GLN   147      69.987  73.911  48.809
ATOM   2222  CG  GLN   147      70.471  74.631  46.750
ATOM   2223  HG2 GLN   147      71.478  74.853  47.103
ATOM   2224  HG3 GLN   147      70.551  74.265  45.726
ATOM   2225  CD  GLN   147      69.652  75.906  46.833
ATOM   2226  OE1 GLN   147      70.051  76.962  47.320
ATOM   2227  NE2 GLN   147      68.403  75.963  46.317
ATOM   2228 HE21 GLN   147      67.848  76.774  46.553
ATOM   2229 HE22 GLN   147      68.011  75.122  45.920
ATOM   2230  C   GLN   147      71.124  71.667  46.411
ATOM   2231  O   GLN   147      72.108  71.893  45.725
ATOM   2232  N   CYS   148      70.071  71.017  45.856
ATOM   2233  H   CYS   148      69.247  70.841  46.414
ATOM   2234  CA  CYS   148      69.816  70.863  44.406
ATOM   2235  HA  CYS   148      70.096  71.795  43.913
ATOM   2236  CB  CYS   148      70.589  69.654  43.869
ATOM   2237  HB2 CYS   148      70.741  69.928  42.825
ATOM   2238  HB3 CYS   148      71.605  69.597  44.261
ATOM   2239  SG  CYS   148      69.678  68.066  44.015
ATOM   2240  HG  CYS   148      70.085  67.770  45.253
ATOM   2241  C   CYS   148      68.296  70.761  44.071
ATOM   2242  O   CYS   148      67.384  70.914  44.877
ATOM   2243  N   ASN   149      67.955  70.435  42.806
ATOM   2244  H   ASN   149      68.615  70.654  42.074
ATOM   2245  CA  ASN   149      66.641  69.957  42.406
ATOM   2246  HA  ASN   149      65.948  69.688  43.203
ATOM   2247  CB  ASN   149      65.998  71.036  41.611
ATOM   2248  HB2 ASN   149      65.857  71.923  42.228
ATOM   2249  HB3 ASN   149      66.683  71.315  40.811
ATOM   2250  CG  ASN   149      64.669  70.604  41.103
ATOM   2251  OD1 ASN   149      64.025  69.659  41.631
ATOM   2252  ND2 ASN   149      64.118  71.218  40.080
ATOM   2253 HD21 ASN   149      63.163  70.958  39.878
ATOM   2254 HD22 ASN   149      64.648  71.907  39.566
ATOM   2255  C   ASN   149      66.886  68.662  41.555
ATOM   2256  O   ASN   149      67.067  68.683  40.342
ATOM   2257  N   PHE   150      66.904  67.477  42.232
ATOM   2258  H   PHE   150      66.580  67.466  43.189
ATOM   2259  CA  PHE   150      67.536  66.261  41.754
ATOM   2260  HA  PHE   150      68.596  66.514  41.717
ATOM   2261  CB  PHE   150      67.238  65.159  42.760
ATOM   2262  HB2 PHE   150      67.740  65.439  43.687
ATOM   2263  HB3 PHE   150      66.179  65.022  42.981
ATOM   2264  CG  PHE   150      67.801  63.839  42.338
ATOM   2265  CD1 PHE   150      69.152  63.625  42.664
ATOM   2266  HD1 PHE   150      69.751  64.431  43.061
ATOM   2267  CE1 PHE   150      69.773  62.363  42.296
ATOM   2268  HE1 PHE   150      70.823  62.247  42.518
ATOM   2269  CZ  PHE   150      69.042  61.377  41.595
ATOM   2270  HZ  PHE   150      69.478  60.419  41.352
ATOM   2271  CE2 PHE   150      67.677  61.519  41.439
ATOM   2272  HE2 PHE   150      67.054  60.738  41.029
ATOM   2273  CD2 PHE   150      67.044  62.779  41.777
ATOM   2274  HD2 PHE   150      66.010  62.885  41.487
ATOM   2275  C   PHE   150      67.032  65.739  40.392
ATOM   2276  O   PHE   150      67.814  65.181  39.602
ATOM   2277  N   THR   151      65.729  66.001  40.030
ATOM   2278  H   THR   151      65.122  66.533  40.637
ATOM   2279  CA  THR   151      65.205  65.797  38.642
ATOM   2280  HA  THR   151      65.160  64.728  38.432
ATOM   2281  CB  THR   151      63.771  66.355  38.550
ATOM   2282  HB  THR   151      63.365  66.486  37.547
ATOM   2283  CG2 THR   151      62.738  65.562  39.352
ATOM   2284 HG21 THR   151      62.751  64.545  38.960
ATOM   2285 HG22 THR   151      63.002  65.632  40.407
ATOM   2286 HG23 THR   151      61.713  65.920  39.252
ATOM   2287  OG1 THR   151      63.802  67.600  39.155
ATOM   2288  HG1 THR   151      63.138  68.090  38.665
ATOM   2289  C   THR   151      66.057  66.448  37.620
ATOM   2290  O   THR   151      66.457  65.849  36.642
ATOM   2291  N   GLU   152      66.175  67.733  37.718
ATOM   2292  H   GLU   152      65.625  68.223  38.410
ATOM   2293  CA  GLU   152      66.896  68.473  36.671
ATOM   2294  HA  GLU   152      66.666  67.942  35.747
ATOM   2295  CB  GLU   152      66.355  69.893  36.628
ATOM   2296  HB2 GLU   152      66.719  70.276  35.674
ATOM   2297  HB3 GLU   152      65.270  69.947  36.714
ATOM   2298  CG  GLU   152      66.929  70.879  37.672
ATOM   2299  HG2 GLU   152      66.961  70.330  38.613
ATOM   2300  HG3 GLU   152      67.960  71.089  37.390
ATOM   2301  CD  GLU   152      66.187  72.247  37.607
ATOM   2302  OE1 GLU   152      65.790  72.602  36.458
ATOM   2303  OE2 GLU   152      66.004  72.942  38.676
ATOM   2304  C   GLU   152      68.416  68.458  36.807
ATOM   2305  O   GLU   152      69.120  68.565  35.826
ATOM   2306  N   ASP   153      68.952  68.435  38.044
ATOM   2307  H   ASP   153      68.274  68.452  38.793
ATOM   2308  CA  ASP   153      70.321  68.603  38.478
ATOM   2309  HA  ASP   153      70.822  69.158  37.685
ATOM   2310  CB  ASP   153      70.270  69.274  39.823
ATOM   2311  HB2 ASP   153      69.550  68.739  40.441
ATOM   2312  HB3 ASP   153      71.206  69.130  40.362
ATOM   2313  CG  ASP   153      70.146  70.794  39.779
ATOM   2314  OD1 ASP   153      69.998  71.334  40.892
ATOM   2315  OD2 ASP   153      70.453  71.506  38.835
ATOM   2316  C   ASP   153      71.096  67.246  38.479
ATOM   2317  O   ASP   153      72.298  67.280  38.662
ATOM   2318  N   TYR   154      70.447  66.100  38.361
ATOM   2319  H   TYR   154      69.456  66.136  38.171
ATOM   2320  CA  TYR   154      71.156  64.859  38.231
ATOM   2321  HA  TYR   154      72.086  65.086  37.710
ATOM   2322  CB  TYR   154      71.438  64.226  39.635
ATOM   2323  HB2 TYR   154      71.807  65.059  40.234
ATOM   2324  HB3 TYR   154      70.497  63.895  40.072
ATOM   2325  CG  TYR   154      72.390  63.023  39.514
ATOM   2326  CD1 TYR   154      73.787  63.206  39.409
ATOM   2327  HD1 TYR   154      74.254  64.151  39.648
ATOM   2328  CE1 TYR   154      74.666  62.047  39.382
ATOM   2329  HE1 TYR   154      75.723  62.165  39.192
ATOM   2330  CZ  TYR   154      74.083  60.735  39.522
ATOM   2331  OH  TYR   154      74.835  59.584  39.579
ATOM   2332  HH  TYR   154      74.322  58.780  39.685
ATOM   2333  CE2 TYR   154      72.674  60.593  39.499
ATOM   2334  HE2 TYR   154      72.223  59.613  39.462
ATOM   2335  CD2 TYR   154      71.848  61.789  39.512
ATOM   2336  HD2 TYR   154      70.775  61.671  39.494
ATOM   2337  C   TYR   154      70.474  63.855  37.249
ATOM   2338  O   TYR   154      71.023  63.416  36.257
ATOM   2339  N   ALA   155      69.183  63.501  37.630
ATOM   2340  H   ALA   155      68.791  63.871  38.485
ATOM   2341  CA  ALA   155      68.391  62.447  37.007
ATOM   2342  HA  ALA   155      68.964  61.527  37.123
ATOM   2343  CB  ALA   155      67.018  62.249  37.699
ATOM   2344  HB1 ALA   155      67.157  61.985  38.748
ATOM   2345  HB2 ALA   155      66.459  63.174  37.555
ATOM   2346  HB3 ALA   155      66.519  61.357  37.321
ATOM   2347  C   ALA   155      68.118  62.620  35.439
ATOM   2348  O   ALA   155      68.088  61.547  34.803
ATOM   2349  N   GLU   156      67.677  63.792  34.949
ATOM   2350  H   GLU   156      67.611  64.576  35.583
ATOM   2351  CA  GLU   156      67.709  64.087  33.519
ATOM   2352  HA  GLU   156      67.076  63.272  33.168
ATOM   2353  CB  GLU   156      67.006  65.392  33.144
ATOM   2354  HB2 GLU   156      66.068  65.413  33.699
ATOM   2355  HB3 GLU   156      67.592  66.248  33.479
ATOM   2356  CG  GLU   156      66.781  65.426  31.632
ATOM   2357  HG2 GLU   156      67.739  65.309  31.126
ATOM   2358  HG3 GLU   156      66.135  64.635  31.251
ATOM   2359  CD  GLU   156      66.190  66.847  31.421
ATOM   2360  OE1 GLU   156      66.931  67.797  31.037
ATOM   2361  OE2 GLU   156      64.959  67.069  31.678
ATOM   2362  C   GLU   156      69.144  63.945  32.976
ATOM   2363  O   GLU   156      69.469  62.916  32.282
ATOM   2364  N   PRO   157      70.184  64.803  33.292
ATOM   2365  CD  PRO   157      70.131  65.786  34.351
ATOM   2366  HD2 PRO   157      69.411  65.423  35.083
ATOM   2367  HD3 PRO   157      69.629  66.641  33.901
ATOM   2368  CG  PRO   157      71.561  66.210  34.720
ATOM   2369  HG2 PRO   157      71.874  65.737  35.651
ATOM   2370  HG3 PRO   157      71.601  67.296  34.800
ATOM   2371  CB  PRO   157      72.343  65.700  33.510
ATOM   2372  HB2 PRO   157      73.234  65.215  33.908
ATOM   2373  HB3 PRO   157      72.663  66.468  32.806
ATOM   2374  CA  PRO   157      71.551  64.671  32.783
ATOM   2375  HA  PRO   157      71.546  65.129  31.795
ATOM   2376  C   PRO   157      72.180  63.265  32.751
ATOM   2377  O   PRO   157      72.728  62.798  31.763
ATOM   2378  N   PHE   158      72.353  62.581  33.914
ATOM   2379  H   PHE   158      72.147  63.101  34.754
ATOM   2380  CA  PHE   158      73.188  61.428  34.011
ATOM   2381  HA  PHE   158      74.148  61.862  33.734
ATOM   2382  CB  PHE   158      73.299  60.990  35.451
ATOM   2383  HB2 PHE   158      73.555  61.886  36.017
ATOM   2384  HB3 PHE   158      72.313  60.729  35.835
ATOM   2385  CG  PHE   158      74.328  59.903  35.765
ATOM   2386  CD1 PHE   158      75.622  59.988  35.265
ATOM   2387  HD1 PHE   158      75.989  60.854  34.736
ATOM   2388  CE1 PHE   158      76.538  58.888  35.503
ATOM   2389  HE1 PHE   158      77.564  58.917  35.163
ATOM   2390  CZ  PHE   158      76.070  57.759  36.239
ATOM   2391  HZ  PHE   158      76.751  56.952  36.472
ATOM   2392  CE2 PHE   158      74.779  57.699  36.658
ATOM   2393  HE2 PHE   158      74.452  56.905  37.313
ATOM   2394  CD2 PHE   158      73.855  58.733  36.401
ATOM   2395  HD2 PHE   158      72.831  58.654  36.733
ATOM   2396  C   PHE   158      72.821  60.252  33.081
ATOM   2397  O   PHE   158      73.502  60.033  32.068
ATOM   2398  N   PRO   159      71.693  59.540  33.326
ATOM   2399  CD  PRO   159      70.603  59.873  34.178
ATOM   2400  HD2 PRO   159      70.402  60.944  34.178
ATOM   2401  HD3 PRO   159      70.848  59.523  35.181
ATOM   2402  CG  PRO   159      69.330  59.201  33.618
ATOM   2403  HG2 PRO   159      68.982  59.825  32.795
ATOM   2404  HG3 PRO   159      68.495  59.013  34.294
ATOM   2405  CB  PRO   159      69.948  57.986  33.015
ATOM   2406  HB2 PRO   159      69.296  57.517  32.278
ATOM   2407  HB3 PRO   159      70.177  57.298  33.830
ATOM   2408  CA  PRO   159      71.285  58.437  32.425
ATOM   2409  HA  PRO   159      72.040  57.649  32.434
ATOM   2410  C   PRO   159      71.028  58.888  30.966
ATOM   2411  O   PRO   159      71.345  58.143  30.066
ATOM   2412  N   ILE   160      70.542  60.094  30.674
ATOM   2413  H   ILE   160      70.392  60.769  31.408
ATOM   2414  CA  ILE   160      70.456  60.538  29.300
ATOM   2415  HA  ILE   160      70.066  59.683  28.747
ATOM   2416  CB  ILE   160      69.521  61.745  29.123
ATOM   2417  HB  ILE   160      69.956  62.588  29.660
ATOM   2418  CG2 ILE   160      69.527  62.146  27.653
ATOM   2419 HG21 ILE   160      68.717  62.782  27.295
ATOM   2420 HG22 ILE   160      70.513  62.493  27.348
ATOM   2421 HG23 ILE   160      69.392  61.212  27.108
ATOM   2422  CG1 ILE   160      68.119  61.411  29.620
ATOM   2423 HG12 ILE   160      67.677  60.570  29.086
ATOM   2424 HG13 ILE   160      68.195  61.031  30.639
ATOM   2425  CD1 ILE   160      67.274  62.668  29.498
ATOM   2426 HD11 ILE   160      66.829  62.807  28.513
ATOM   2427 HD12 ILE   160      66.424  62.410  30.129
ATOM   2428 HD13 ILE   160      67.805  63.541  29.876
ATOM   2429  C   ILE   160      71.804  60.723  28.693
ATOM   2430  O   ILE   160      72.092  60.147  27.633
ATOM   2431  N   ARG   161      72.699  61.427  29.345
ATOM   2432  H   ARG   161      72.443  61.762  30.263
ATOM   2433  CA  ARG   161      74.075  61.643  28.833
ATOM   2434  HA  ARG   161      73.939  62.140  27.873
ATOM   2435  CB  ARG   161      74.851  62.627  29.618
ATOM   2436  HB2 ARG   161      75.065  62.307  30.637
ATOM   2437  HB3 ARG   161      75.805  62.686  29.093
ATOM   2438  CG  ARG   161      74.211  64.003  29.482
ATOM   2439  HG2 ARG   161      74.219  64.237  28.418
ATOM   2440  HG3 ARG   161      73.155  63.963  29.749
ATOM   2441  CD  ARG   161      75.007  65.090  30.245
ATOM   2442  HD2 ARG   161      74.965  64.870  31.312
ATOM   2443  HD3 ARG   161      75.993  65.083  29.780
ATOM   2444  NE  ARG   161      74.391  66.440  30.174
ATOM   2445  HE  ARG   161      73.382  66.492  30.202
ATOM   2446  CZ  ARG   161      75.086  67.606  30.142
ATOM   2447  NH1 ARG   161      76.371  67.727  30.197
ATOM   2448 HH11 ARG   161      76.967  66.959  30.471
ATOM   2449 HH12 ARG   161      76.686  68.635  29.888
ATOM   2450  NH2 ARG   161      74.419  68.690  29.793
ATOM   2451 HH21 ARG   161      73.644  68.655  29.147
ATOM   2452 HH22 ARG   161      74.969  69.528  29.663
ATOM   2453  C   ARG   161      74.849  60.370  28.657
ATOM   2454  O   ARG   161      75.696  60.302  27.742
ATOM   2455  N   ILE   162      74.581  59.336  29.441
ATOM   2456  H   ILE   162      73.990  59.427  30.255
ATOM   2457  CA  ILE   162      75.114  57.990  29.112
ATOM   2458  HA  ILE   162      76.165  58.118  28.854
ATOM   2459  CB  ILE   162      75.130  57.063  30.269
ATOM   2460  HB  ILE   162      74.091  56.771  30.429
ATOM   2461  CG2 ILE   162      75.952  55.748  29.915
ATOM   2462 HG21 ILE   162      75.619  55.322  28.968
ATOM   2463 HG22 ILE   162      77.039  55.826  29.960
ATOM   2464 HG23 ILE   162      75.698  54.981  30.646
ATOM   2465  CG1 ILE   162      75.843  57.725  31.509
ATOM   2466 HG12 ILE   162      76.895  57.463  31.404
ATOM   2467 HG13 ILE   162      75.617  58.786  31.608
ATOM   2468  CD1 ILE   162      75.414  57.070  32.834
ATOM   2469 HD11 ILE   162      75.353  55.996  32.664
ATOM   2470 HD12 ILE   162      76.089  57.340  33.646
ATOM   2471 HD13 ILE   162      74.424  57.428  33.114
ATOM   2472  C   ILE   162      74.491  57.462  27.831
ATOM   2473  O   ILE   162      75.129  56.982  26.986
ATOM   2474  N   PHE   163      73.114  57.356  27.793
ATOM   2475  H   PHE   163      72.534  57.654  28.564
ATOM   2476  CA  PHE   163      72.426  56.896  26.569
ATOM   2477  HA  PHE   163      72.725  55.872  26.351
ATOM   2478  CB  PHE   163      70.912  56.960  26.763
ATOM   2479  HB2 PHE   163      70.732  56.883  27.835
ATOM   2480  HB3 PHE   163      70.473  57.895  26.416
ATOM   2481  CG  PHE   163      70.199  55.839  25.984
ATOM   2482  CD1 PHE   163      70.017  54.607  26.687
ATOM   2483  HD1 PHE   163      70.170  54.563  27.755
ATOM   2484  CE1 PHE   163      69.342  53.558  26.038
ATOM   2485  HE1 PHE   163      69.010  52.681  26.572
ATOM   2486  CZ  PHE   163      68.938  53.697  24.711
ATOM   2487  HZ  PHE   163      68.437  52.840  24.285
ATOM   2488  CE2 PHE   163      69.209  54.852  24.006
ATOM   2489  HE2 PHE   163      68.858  54.826  22.985
ATOM   2490  CD2 PHE   163      69.850  55.937  24.613
ATOM   2491  HD2 PHE   163      70.063  56.882  24.138
ATOM   2492  C   PHE   163      72.822  57.712  25.214
ATOM   2493  O   PHE   163      73.013  57.145  24.186
ATOM   2494  N   MET   164      73.161  58.923  25.409
ATOM   2495  H   MET   164      72.989  59.379  26.293
ATOM   2496  CA  MET   164      73.692  59.784  24.300
ATOM   2497  HA  MET   164      73.053  59.809  23.417
ATOM   2498  CB  MET   164      73.802  61.192  24.897
ATOM   2499  HB2 MET   164      74.409  61.144  25.800
ATOM   2500  HB3 MET   164      74.312  61.833  24.178
ATOM   2501  CG  MET   164      72.475  62.015  25.041
ATOM   2502  HG2 MET   164      72.115  61.887  26.062
ATOM   2503  HG3 MET   164      72.760  63.049  24.847
ATOM   2504  SD  MET   164      71.096  61.622  23.937
ATOM   2505  CE  MET   164      70.301  60.079  24.524
ATOM   2506  HE1 MET   164      70.847  59.224  24.124
ATOM   2507  HE2 MET   164      70.385  60.022  25.609
ATOM   2508  HE3 MET   164      69.246  60.113  24.253
ATOM   2509  C   MET   164      75.059  59.341  23.947
ATOM   2510  O   MET   164      75.273  59.242  22.774
ATOM   2511  N   LEU   165      75.991  58.913  24.860
ATOM   2512  H   LEU   165      75.772  58.983  25.844
ATOM   2513  CA  LEU   165      77.251  58.140  24.514
ATOM   2514  HA  LEU   165      77.832  58.778  23.848
ATOM   2515  CB  LEU   165      78.094  57.809  25.777
ATOM   2516  HB2 LEU   165      77.556  57.117  26.425
ATOM   2517  HB3 LEU   165      79.032  57.395  25.405
ATOM   2518  CG  LEU   165      78.545  59.169  26.483
ATOM   2519  HG  LEU   165      77.635  59.682  26.797
ATOM   2520  CD1 LEU   165      79.215  58.815  27.804
ATOM   2521 HD11 LEU   165      79.490  59.727  28.335
ATOM   2522 HD12 LEU   165      78.669  58.134  28.458
ATOM   2523 HD13 LEU   165      80.201  58.392  27.612
ATOM   2524  CD2 LEU   165      79.318  60.224  25.635
ATOM   2525 HD21 LEU   165      78.881  60.380  24.648
ATOM   2526 HD22 LEU   165      79.411  61.163  26.180
ATOM   2527 HD23 LEU   165      80.313  59.814  25.463
ATOM   2528  C   LEU   165      76.855  56.832  23.794
ATOM   2529  O   LEU   165      77.263  56.638  22.652
ATOM   2530  N   LEU   166      76.052  55.968  24.483
ATOM   2531  H   LEU   166      75.855  56.123  25.461
ATOM   2532  CA  LEU   166      75.626  54.689  23.852
ATOM   2533  HA  LEU   166      76.442  53.968  23.878
ATOM   2534  CB  LEU   166      74.553  54.079  24.758
ATOM   2535  HB2 LEU   166      74.942  54.034  25.776
ATOM   2536  HB3 LEU   166      73.716  54.774  24.808
ATOM   2537  CG  LEU   166      74.106  52.594  24.453
ATOM   2538  HG  LEU   166      74.035  52.587  23.365
ATOM   2539  CD1 LEU   166      74.941  51.408  24.878
ATOM   2540 HD11 LEU   166      75.875  51.428  24.315
ATOM   2541 HD12 LEU   166      75.168  51.382  25.944
ATOM   2542 HD13 LEU   166      74.485  50.457  24.606
ATOM   2543  CD2 LEU   166      72.660  52.435  24.819
ATOM   2544 HD21 LEU   166      72.667  52.513  25.907
ATOM   2545 HD22 LEU   166      72.049  53.229  24.391
ATOM   2546 HD23 LEU   166      72.172  51.489  24.583
ATOM   2547  C   LEU   166      75.133  54.801  22.385
ATOM   2548  O   LEU   166      75.358  53.815  21.658
ATOM   2549  N   ALA   167      74.487  55.912  21.957
ATOM   2550  H   ALA   167      74.243  56.565  22.689
ATOM   2551  CA  ALA   167      73.811  56.046  20.670
ATOM   2552  HA  ALA   167      73.726  55.060  20.213
ATOM   2553  CB  ALA   167      72.509  56.623  21.105
ATOM   2554  HB1 ALA   167      71.929  56.770  20.194
ATOM   2555  HB2 ALA   167      71.955  55.957  21.767
ATOM   2556  HB3 ALA   167      72.644  57.601  21.566
ATOM   2557  C   ALA   167      74.576  57.006  19.759
ATOM   2558  O   ALA   167      74.128  57.228  18.637
ATOM   2559  N   GLY   168      75.658  57.591  20.267
ATOM   2560  H   GLY   168      76.019  57.204  21.127
ATOM   2561  CA  GLY   168      76.406  58.551  19.489
ATOM   2562  HA2 GLY   168      77.328  58.756  20.034
ATOM   2563  HA3 GLY   168      76.608  58.243  18.464
ATOM   2564  C   GLY   168      75.644  59.863  19.342
ATOM   2565  O   GLY   168      75.962  60.644  18.487
ATOM   2566  N   LEU   169      74.619  60.130  20.166
ATOM   2567  H   LEU   169      74.427  59.507  20.938
ATOM   2568  CA  LEU   169      73.749  61.303  20.065
ATOM   2569  HA  LEU   169      73.688  61.570  19.011
ATOM   2570  CB  LEU   169      72.295  60.939  20.472
ATOM   2571  HB2 LEU   169      72.341  60.131  21.202
ATOM   2572  HB3 LEU   169      71.922  61.826  20.985
ATOM   2573  CG  LEU   169      71.320  60.596  19.286
ATOM   2574  HG  LEU   169      71.307  61.411  18.563
ATOM   2575  CD1 LEU   169      71.729  59.371  18.419
ATOM   2576 HD11 LEU   169      70.969  59.077  17.695
ATOM   2577 HD12 LEU   169      72.612  59.548  17.806
ATOM   2578 HD13 LEU   169      71.998  58.561  19.097
ATOM   2579  CD2 LEU   169      69.827  60.354  19.707
ATOM   2580 HD21 LEU   169      69.402  61.278  20.098
ATOM   2581 HD22 LEU   169      69.115  60.032  18.947
ATOM   2582 HD23 LEU   169      69.823  59.717  20.593
ATOM   2583  C   LEU   169      74.326  62.605  20.740
ATOM   2584  O   LEU   169      74.714  62.492  21.876
ATOM   2585  N   PRO   170      74.186  63.814  20.141
ATOM   2586  CD  PRO   170      73.719  64.134  18.872
ATOM   2587  HD2 PRO   170      72.678  63.822  18.773
ATOM   2588  HD3 PRO   170      74.140  63.507  18.086
ATOM   2589  CG  PRO   170      73.902  65.567  18.555
ATOM   2590  HG2 PRO   170      73.068  66.238  18.763
ATOM   2591  HG3 PRO   170      74.326  65.850  17.591
ATOM   2592  CB  PRO   170      74.909  65.996  19.720
ATOM   2593  HB2 PRO   170      74.626  66.990  20.065
ATOM   2594  HB3 PRO   170      75.954  66.111  19.432
ATOM   2595  CA  PRO   170      74.739  64.971  20.818
ATOM   2596  HA  PRO   170      75.696  64.597  21.182
ATOM   2597  C   PRO   170      73.902  65.478  21.968
ATOM   2598  O   PRO   170      72.655  65.614  21.815
ATOM   2599  N   GLU   171      74.475  65.727  23.116
ATOM   2600  H   GLU   171      75.460  65.553  23.259
ATOM   2601  CA  GLU   171      73.840  66.358  24.358
ATOM   2602  HA  GLU   171      73.209  65.545  24.717
ATOM   2603  CB  GLU   171      74.868  66.577  25.493
ATOM   2604  HB2 GLU   171      75.373  67.509  25.237
ATOM   2605  HB3 GLU   171      74.284  66.801  26.385
ATOM   2606  CG  GLU   171      75.716  65.441  25.866
ATOM   2607  HG2 GLU   171      75.860  65.431  26.947
ATOM   2608  HG3 GLU   171      75.218  64.503  25.617
ATOM   2609  CD  GLU   171      77.037  65.477  25.102
ATOM   2610  OE1 GLU   171      77.029  65.071  23.907
ATOM   2611  OE2 GLU   171      78.024  65.890  25.778
ATOM   2612  C   GLU   171      72.985  67.595  24.110
ATOM   2613  O   GLU   171      72.059  67.865  24.849
ATOM   2614  N   GLU   172      73.259  68.424  23.060
ATOM   2615  H   GLU   172      73.952  68.147  22.380
ATOM   2616  CA  GLU   172      72.337  69.563  22.809
ATOM   2617  HA  GLU   172      72.261  70.228  23.670
ATOM   2618  CB  GLU   172      73.021  70.520  21.741
ATOM   2619  HB2 GLU   172      72.394  71.388  21.544
ATOM   2620  HB3 GLU   172      73.949  70.912  22.158
ATOM   2621  CG  GLU   172      73.279  69.865  20.392
ATOM   2622  HG2 GLU   172      73.900  68.987  20.573
ATOM   2623  HG3 GLU   172      72.331  69.466  20.029
ATOM   2624  CD  GLU   172      73.878  70.812  19.307
ATOM   2625  OE1 GLU   172      73.077  71.528  18.676
ATOM   2626  OE2 GLU   172      75.144  70.752  19.009
ATOM   2627  C   GLU   172      70.883  69.054  22.398
ATOM   2628  O   GLU   172      69.891  69.853  22.378
ATOM   2629  N   ASP   173      70.731  67.892  21.843
ATOM   2630  H   ASP   173      71.551  67.323  21.683
ATOM   2631  CA  ASP   173      69.433  67.242  21.666
ATOM   2632  HA  ASP   173      68.779  67.956  21.164
ATOM   2633  CB  ASP   173      69.613  66.030  20.723
ATOM   2634  HB2 ASP   173      70.400  65.330  21.000
ATOM   2635  HB3 ASP   173      68.655  65.512  20.768
ATOM   2636  CG  ASP   173      69.946  66.480  19.311
ATOM   2637  OD1 ASP   173      70.609  65.798  18.522
ATOM   2638  OD2 ASP   173      69.394  67.537  18.898
ATOM   2639  C   ASP   173      68.690  66.818  22.942
ATOM   2640  O   ASP   173      67.514  66.619  22.795
ATOM   2641  N   ILE   174      69.247  66.863  24.130
ATOM   2642  H   ILE   174      70.182  67.227  24.240
ATOM   2643  CA  ILE   174      68.511  66.327  25.245
ATOM   2644  HA  ILE   174      68.116  65.350  24.962
ATOM   2645  CB  ILE   174      69.549  66.309  26.446
ATOM   2646  HB  ILE   174      70.049  67.267  26.593
ATOM   2647  CG2 ILE   174      68.867  66.019  27.790
ATOM   2648 HG21 ILE   174      69.542  66.236  28.617
ATOM   2649 HG22 ILE   174      68.090  66.754  28.001
ATOM   2650 HG23 ILE   174      68.428  65.021  27.788
ATOM   2651  CG1 ILE   174      70.715  65.317  26.137
ATOM   2652 HG12 ILE   174      70.301  64.316  26.014
ATOM   2653 HG13 ILE   174      71.248  65.616  25.234
ATOM   2654  CD1 ILE   174      71.800  65.232  27.254
ATOM   2655 HD11 ILE   174      71.480  64.709  28.156
ATOM   2656 HD12 ILE   174      72.617  64.660  26.816
ATOM   2657 HD13 ILE   174      72.188  66.186  27.611
ATOM   2658  C   ILE   174      67.150  67.031  25.580
ATOM   2659  O   ILE   174      66.201  66.244  25.865
ATOM   2660  N   PRO   175      67.015  68.342  25.430
ATOM   2661  CD  PRO   175      68.180  69.308  25.530
ATOM   2662  HD2 PRO   175      68.595  69.437  24.530
ATOM   2663  HD3 PRO   175      68.946  68.948  26.216
ATOM   2664  CG  PRO   175      67.432  70.558  26.062
ATOM   2665  HG2 PRO   175      67.753  71.481  25.581
ATOM   2666  HG3 PRO   175      67.538  70.665  27.142
ATOM   2667  CB  PRO   175      65.961  70.411  25.696
ATOM   2668  HB2 PRO   175      65.874  70.844  24.700
ATOM   2669  HB3 PRO   175      65.270  70.802  26.443
ATOM   2670  CA  PRO   175      65.701  68.945  25.679
ATOM   2671  HA  PRO   175      65.430  68.809  26.726
ATOM   2672  C   PRO   175      64.611  68.501  24.677
ATOM   2673  O   PRO   175      63.385  68.444  24.947
ATOM   2674  N   HIE   176      64.974  68.197  23.497
ATOM   2675  H   HIE   176      65.955  68.137  23.268
ATOM   2676  CA  HIE   176      64.135  67.659  22.428
ATOM   2677  HA  HIE   176      63.295  68.321  22.213
ATOM   2678  CB  HIE   176      64.880  67.568  21.094
ATOM   2679  HB2 HIE   176      65.257  68.563  20.856
ATOM   2680  HB3 HIE   176      65.810  67.001  21.076
ATOM   2681  CG  HIE   176      63.918  67.287  19.901
ATOM   2682  ND1 HIE   176      64.085  66.337  18.811
ATOM   2683  CE1 HIE   176      62.991  66.691  18.042
ATOM   2684  HE1 HIE   176      62.810  66.214  17.090
ATOM   2685  NE2 HIE   176      62.211  67.658  18.523
ATOM   2686  HE2 HIE   176      61.499  68.175  18.026
ATOM   2687  CD2 HIE   176      62.806  68.050  19.692
ATOM   2688  HD2 HIE   176      62.458  68.935  20.204
ATOM   2689  C   HIE   176      63.505  66.303  22.821
ATOM   2690  O   HIE   176      62.314  66.105  22.981
ATOM   2691  N   LEU   177      64.374  65.344  23.124
ATOM   2692  H   LEU   177      65.334  65.656  23.170
ATOM   2693  CA  LEU   177      64.004  63.915  23.132
ATOM   2694  HA  LEU   177      63.320  63.772  22.296
ATOM   2695  CB  LEU   177      65.307  63.082  22.912
ATOM   2696  HB2 LEU   177      66.074  63.447  23.596
ATOM   2697  HB3 LEU   177      65.131  62.034  23.154
ATOM   2698  CG  LEU   177      65.918  63.161  21.479
ATOM   2699  HG  LEU   177      66.001  64.210  21.194
ATOM   2700  CD1 LEU   177      67.350  62.549  21.556
ATOM   2701 HD11 LEU   177      67.889  63.085  22.337
ATOM   2702 HD12 LEU   177      67.337  61.464  21.660
ATOM   2703 HD13 LEU   177      67.732  62.740  20.553
ATOM   2704  CD2 LEU   177      65.004  62.456  20.522
ATOM   2705 HD21 LEU   177      65.383  62.693  19.528
ATOM   2706 HD22 LEU   177      65.074  61.382  20.702
ATOM   2707 HD23 LEU   177      63.962  62.758  20.624
ATOM   2708  C   LEU   177      63.283  63.530  24.394
ATOM   2709  O   LEU   177      62.183  62.988  24.347
ATOM   2710  N   LYS   178      63.707  64.117  25.600
ATOM   2711  H   LYS   178      64.550  64.672  25.555
ATOM   2712  CA  LYS   178      63.026  64.082  26.871
ATOM   2713  HA  LYS   178      62.861  63.075  27.255
ATOM   2714  CB  LYS   178      63.969  64.672  27.953
ATOM   2715  HB2 LYS   178      64.966  64.243  27.862
ATOM   2716  HB3 LYS   178      64.096  65.723  27.692
ATOM   2717  CG  LYS   178      63.438  64.740  29.406
ATOM   2718  HG2 LYS   178      63.921  65.532  29.980
ATOM   2719  HG3 LYS   178      62.393  65.035  29.314
ATOM   2720  CD  LYS   178      63.455  63.398  30.240
ATOM   2721  HD2 LYS   178      63.986  62.650  29.653
ATOM   2722  HD3 LYS   178      64.017  63.477  31.170
ATOM   2723  CE  LYS   178      62.022  62.982  30.604
ATOM   2724  HE2 LYS   178      61.944  62.627  31.632
ATOM   2725  HE3 LYS   178      61.403  63.875  30.695
ATOM   2726  NZ  LYS   178      61.341  61.896  29.831
ATOM   2727  HZ1 LYS   178      62.056  61.269  29.490
ATOM   2728  HZ2 LYS   178      60.689  61.329  30.354
ATOM   2729  HZ3 LYS   178      60.801  62.234  29.046
ATOM   2730  C   LYS   178      61.663  64.760  26.915
ATOM   2731  O   LYS   178      60.740  64.268  27.576
ATOM   2732  N   TYR   179      61.434  65.831  26.216
ATOM   2733  H   TYR   179      62.219  66.166  25.676
ATOM   2734  CA  TYR   179      60.072  66.456  25.948
ATOM   2735  HA  TYR   179      59.675  66.753  26.918
ATOM   2736  CB  TYR   179      60.269  67.737  25.150
ATOM   2737  HB2 TYR   179      60.883  68.424  25.731
ATOM   2738  HB3 TYR   179      60.747  67.540  24.190
ATOM   2739  CG  TYR   179      58.952  68.388  24.711
ATOM   2740  CD1 TYR   179      58.037  68.829  25.690
ATOM   2741  HD1 TYR   179      58.346  68.904  26.723
ATOM   2742  CE1 TYR   179      56.737  69.206  25.369
ATOM   2743  HE1 TYR   179      56.144  69.520  26.216
ATOM   2744  CZ  TYR   179      56.305  69.250  24.013
ATOM   2745  OH  TYR   179      55.076  69.789  23.732
ATOM   2746  HH  TYR   179      54.491  69.888  24.487
ATOM   2747  CE2 TYR   179      57.203  68.871  22.976
ATOM   2748  HE2 TYR   179      56.836  68.906  21.961
ATOM   2749  CD2 TYR   179      58.513  68.359  23.367
ATOM   2750  HD2 TYR   179      59.131  67.868  22.630
ATOM   2751  C   TYR   179      59.052  65.434  25.278
ATOM   2752  O   TYR   179      57.931  65.305  25.760
ATOM   2753  N   LEU   180      59.517  64.758  24.239
ATOM   2754  H   LEU   180      60.479  64.997  24.043
ATOM   2755  CA  LEU   180      58.886  63.658  23.468
ATOM   2756  HA  LEU   180      57.952  64.094  23.111
ATOM   2757  CB  LEU   180      59.667  63.299  22.170
ATOM   2758  HB2 LEU   180      60.681  63.065  22.494
ATOM   2759  HB3 LEU   180      59.328  62.349  21.757
ATOM   2760  CG  LEU   180      59.740  64.361  21.031
ATOM   2761  HG  LEU   180      60.281  65.192  21.484
ATOM   2762  CD1 LEU   180      60.631  63.836  19.973
ATOM   2763 HD11 LEU   180      60.541  64.535  19.141
ATOM   2764 HD12 LEU   180      61.690  63.882  20.229
ATOM   2765 HD13 LEU   180      60.402  62.826  19.633
ATOM   2766  CD2 LEU   180      58.206  64.830  20.630
ATOM   2767 HD21 LEU   180      58.040  65.842  21.001
ATOM   2768 HD22 LEU   180      58.046  64.850  19.551
ATOM   2769 HD23 LEU   180      57.456  64.191  21.097
ATOM   2770  C   LEU   180      58.635  62.425  24.305
ATOM   2771  O   LEU   180      57.494  61.937  24.251
ATOM   2772  N   THR   181      59.604  61.889  25.035
ATOM   2773  H   THR   181      60.575  62.162  25.004
ATOM   2774  CA  THR   181      59.407  60.751  25.960
ATOM   2775  HA  THR   181      58.824  60.006  25.420
ATOM   2776  CB  THR   181      60.685  59.939  26.332
ATOM   2777  HB  THR   181      60.452  58.984  26.801
ATOM   2778  CG2 THR   181      61.498  59.641  25.031
ATOM   2779 HG21 THR   181      62.053  58.724  25.235
ATOM   2780 HG22 THR   181      60.825  59.358  24.221
ATOM   2781 HG23 THR   181      62.087  60.494  24.692
ATOM   2782  OG1 THR   181      61.435  60.741  27.225
ATOM   2783  HG1 THR   181      62.190  60.226  27.518
ATOM   2784  C   THR   181      58.588  61.148  27.252
ATOM   2785  O   THR   181      58.048  60.248  27.903
ATOM   2786  N   ASP   182      58.528  62.429  27.599
ATOM   2787  H   ASP   182      59.127  63.121  27.173
ATOM   2788  CA  ASP   182      57.591  62.854  28.649
ATOM   2789  HA  ASP   182      57.545  62.121  29.454
ATOM   2790  CB  ASP   182      58.199  64.060  29.227
ATOM   2791  HB2 ASP   182      59.213  63.777  29.509
ATOM   2792  HB3 ASP   182      58.271  64.890  28.524
ATOM   2793  CG  ASP   182      57.533  64.481  30.562
ATOM   2794  OD1 ASP   182      56.830  65.534  30.599
ATOM   2795  OD2 ASP   182      57.810  63.917  31.647
ATOM   2796  C   ASP   182      56.116  63.039  28.019
ATOM   2797  O   ASP   182      55.142  62.616  28.714
ATOM   2798  N   GLN   183      55.875  63.749  26.888
ATOM   2799  H   GLN   183      56.714  64.046  26.411
ATOM   2800  CA  GLN   183      54.532  63.839  26.288
ATOM   2801  HA  GLN   183      53.900  64.239  27.081
ATOM   2802  CB  GLN   183      54.356  64.757  25.008
ATOM   2803  HB2 GLN   183      55.050  64.386  24.253
ATOM   2804  HB3 GLN   183      53.384  64.561  24.555
ATOM   2805  CG  GLN   183      54.701  66.264  25.264
ATOM   2806  HG2 GLN   183      55.698  66.307  25.701
ATOM   2807  HG3 GLN   183      54.696  66.790  24.309
ATOM   2808  CD  GLN   183      53.590  66.954  26.105
ATOM   2809  OE1 GLN   183      52.582  67.478  25.694
ATOM   2810  NE2 GLN   183      53.816  67.169  27.416
ATOM   2811 HE21 GLN   183      53.159  67.757  27.907
ATOM   2812 HE22 GLN   183      54.682  66.964  27.892
ATOM   2813  C   GLN   183      53.949  62.484  25.970
ATOM   2814  O   GLN   183      52.737  62.262  26.133
ATOM   2815  N   MET   184      54.711  61.539  25.457
ATOM   2816  H   MET   184      55.600  61.813  25.064
ATOM   2817  CA  MET   184      54.126  60.144  25.206
ATOM   2818  HA  MET   184      53.298  60.346  24.527
ATOM   2819  CB  MET   184      55.190  59.187  24.617
ATOM   2820  HB2 MET   184      56.108  59.296  25.194
ATOM   2821  HB3 MET   184      54.852  58.157  24.730
ATOM   2822  CG  MET   184      55.379  59.604  23.100
ATOM   2823  HG2 MET   184      54.592  59.166  22.487
ATOM   2824  HG3 MET   184      55.432  60.671  22.888
ATOM   2825  SD  MET   184      56.883  58.854  22.470
ATOM   2826  CE  MET   184      57.272  59.811  20.945
ATOM   2827  HE1 MET   184      56.336  60.160  20.507
ATOM   2828  HE2 MET   184      57.741  60.731  21.293
ATOM   2829  HE3 MET   184      57.873  59.238  20.240
ATOM   2830  C   MET   184      53.662  59.492  26.530
ATOM   2831  O   MET   184      52.613  58.798  26.472
ATOM   2832  N   THR   185      54.367  59.590  27.686
ATOM   2833  H   THR   185      55.050  60.333  27.738
ATOM   2834  CA  THR   185      54.087  58.884  28.935
ATOM   2835  HA  THR   185      53.670  57.907  28.693
ATOM   2836  CB  THR   185      55.370  58.622  29.748
ATOM   2837  HB  THR   185      55.287  58.394  30.810
ATOM   2838  CG2 THR   185      56.322  57.686  29.003
ATOM   2839 HG21 THR   185      56.391  57.848  27.928
ATOM   2840 HG22 THR   185      57.288  57.725  29.508
ATOM   2841 HG23 THR   185      55.884  56.691  28.929
ATOM   2842  OG1 THR   185      56.067  59.787  29.841
ATOM   2843  HG1 THR   185      56.755  59.780  29.172
ATOM   2844  C   THR   185      53.063  59.725  29.744
ATOM   2845  O   THR   185      52.276  59.116  30.458
ATOM   2846  N   ARG   186      53.170  61.053  29.750
ATOM   2847  H   ARG   186      53.837  61.504  29.140
ATOM   2848  CA  ARG   186      52.416  61.892  30.697
ATOM   2849  HA  ARG   186      51.491  61.391  30.984
ATOM   2850  CB  ARG   186      53.315  62.174  31.873
ATOM   2851  HB2 ARG   186      54.336  62.351  31.535
ATOM   2852  HB3 ARG   186      53.086  63.088  32.420
ATOM   2853  CG  ARG   186      53.346  61.039  32.940
ATOM   2854  HG2 ARG   186      52.402  61.059  33.485
ATOM   2855  HG3 ARG   186      53.539  60.078  32.460
ATOM   2856  CD  ARG   186      54.361  61.118  34.036
ATOM   2857  HD2 ARG   186      54.217  62.008  34.650
ATOM   2858  HD3 ARG   186      54.368  60.211  34.640
ATOM   2859  NE  ARG   186      55.698  61.497  33.479
ATOM   2860  HE  ARG   186      55.922  62.481  33.438
ATOM   2861  CZ  ARG   186      56.603  60.691  32.828
ATOM   2862  NH1 ARG   186      56.587  59.410  32.881
ATOM   2863 HH11 ARG   186      55.909  58.966  33.483
ATOM   2864 HH12 ARG   186      57.284  58.820  32.449
ATOM   2865  NH2 ARG   186      57.483  61.297  32.014
ATOM   2866 HH21 ARG   186      57.612  62.298  32.036
ATOM   2867 HH22 ARG   186      58.016  60.746  31.356
ATOM   2868  C   ARG   186      51.989  63.251  29.973
ATOM   2869  O   ARG   186      52.747  64.258  30.085
ATOM   2870  N   PRO   187      50.920  63.360  29.195
ATOM   2871  CD  PRO   187      49.860  62.338  29.152
ATOM   2872  HD2 PRO   187      49.470  62.049  30.128
ATOM   2873  HD3 PRO   187      50.300  61.453  28.691
ATOM   2874  CG  PRO   187      48.698  62.906  28.312
ATOM   2875  HG2 PRO   187      48.109  63.593  28.921
ATOM   2876  HG3 PRO   187      47.971  62.218  27.879
ATOM   2877  CB  PRO   187      49.494  63.683  27.287
ATOM   2878  HB2 PRO   187      48.872  64.463  26.850
ATOM   2879  HB3 PRO   187      50.058  63.152  26.520
ATOM   2880  CA  PRO   187      50.533  64.346  28.159
ATOM   2881  HA  PRO   187      51.395  64.652  27.565
ATOM   2882  C   PRO   187      50.034  65.654  28.827
ATOM   2883  O   PRO   187      50.001  65.751  30.049
ATOM   2884  N   ASP   188      49.643  66.682  28.067
ATOM   2885  H   ASP   188      49.510  66.551  27.074
ATOM   2886  CA  ASP   188      49.174  67.980  28.616
ATOM   2887  HA  ASP   188      48.327  67.910  29.298
ATOM   2888  CB  ASP   188      50.185  68.777  29.342
ATOM   2889  HB2 ASP   188      50.592  68.161  30.143
ATOM   2890  HB3 ASP   188      50.988  69.016  28.645
ATOM   2891  CG  ASP   188      49.604  70.014  30.050
ATOM   2892  OD1 ASP   188      48.746  69.837  30.901
ATOM   2893  OD2 ASP   188      49.767  71.191  29.612
ATOM   2894  C   ASP   188      48.725  68.969  27.510
ATOM   2895  O   ASP   188      47.709  69.653  27.667
ATOM   2896  N   GLY   189      49.458  68.954  26.383
ATOM   2897  H   GLY   189      50.067  68.154  26.286
ATOM   2898  CA  GLY   189      49.497  69.883  25.275
ATOM   2899  HA2 GLY   189      49.083  70.834  25.609
ATOM   2900  HA3 GLY   189      50.564  69.848  25.053
ATOM   2901  C   GLY   189      48.672  69.366  24.104
ATOM   2902  O   GLY   189      47.916  68.421  24.206
ATOM   2903  N   SER   190      48.798  70.031  22.927
ATOM   2904  H   SER   190      49.421  70.827  22.948
ATOM   2905  CA  SER   190      48.029  69.647  21.737
ATOM   2906  HA  SER   190      47.079  69.197  22.026
ATOM   2907  CB  SER   190      47.768  70.947  20.947
ATOM   2908  HB2 SER   190      47.411  70.660  19.958
ATOM   2909  HB3 SER   190      47.029  71.523  21.504
ATOM   2910  OG  SER   190      48.960  71.740  20.738
ATOM   2911  HG  SER   190      48.885  72.351  20.001
ATOM   2912  C   SER   190      48.732  68.616  20.806
ATOM   2913  O   SER   190      48.124  67.977  19.963
ATOM   2914  N   MET   191      50.022  68.354  21.056
ATOM   2915  H   MET   191      50.470  68.953  21.736
ATOM   2916  CA  MET   191      50.752  67.206  20.528
ATOM   2917  HA  MET   191      50.806  67.268  19.441
ATOM   2918  CB  MET   191      52.172  67.311  21.124
ATOM   2919  HB2 MET   191      52.622  68.287  20.946
ATOM   2920  HB3 MET   191      52.253  67.122  22.194
ATOM   2921  CG  MET   191      52.956  66.277  20.334
ATOM   2922  HG2 MET   191      52.551  65.326  20.681
ATOM   2923  HG3 MET   191      52.892  66.517  19.273
ATOM   2924  SD  MET   191      54.707  66.417  20.801
ATOM   2925  CE  MET   191      55.297  67.741  19.665
ATOM   2926  HE1 MET   191      55.039  67.426  18.653
ATOM   2927  HE2 MET   191      54.816  68.696  19.878
ATOM   2928  HE3 MET   191      56.364  67.833  19.862
ATOM   2929  C   MET   191      50.086  65.970  21.045
ATOM   2930  O   MET   191      50.009  65.699  22.289
ATOM   2931  N   THR   192      49.434  65.262  20.105
ATOM   2932  H   THR   192      49.472  65.637  19.168
ATOM   2933  CA  THR   192      49.034  63.815  20.195
ATOM   2934  HA  THR   192      48.624  63.529  21.162
ATOM   2935  CB  THR   192      47.941  63.396  19.200
ATOM   2936  HB  THR   192      47.747  62.338  19.375
ATOM   2937  CG2 THR   192      46.682  64.165  19.452
ATOM   2938 HG21 THR   192      45.863  63.897  18.785
ATOM   2939 HG22 THR   192      46.277  63.986  20.449
ATOM   2940 HG23 THR   192      46.804  65.237  19.307
ATOM   2941  OG1 THR   192      48.491  63.490  17.922
ATOM   2942  HG1 THR   192      48.512  64.418  17.676
ATOM   2943  C   THR   192      50.217  62.856  20.125
ATOM   2944  O   THR   192      51.315  63.272  19.777
ATOM   2945  N   PHE   193      50.030  61.586  20.479
ATOM   2946  H   PHE   193      49.072  61.312  20.639
ATOM   2947  CA  PHE   193      51.046  60.481  20.510
ATOM   2948  HA  PHE   193      51.918  60.833  21.061
ATOM   2949  CB  PHE   193      50.509  59.222  21.181
ATOM   2950  HB2 PHE   193      49.873  59.506  22.019
ATOM   2951  HB3 PHE   193      49.818  58.715  20.507
ATOM   2952  CG  PHE   193      51.566  58.205  21.642
ATOM   2953  CD1 PHE   193      51.718  57.847  23.011
ATOM   2954  HD1 PHE   193      51.089  58.343  23.737
ATOM   2955  CE1 PHE   193      52.732  57.011  23.499
ATOM   2956  HE1 PHE   193      52.952  56.813  24.538
ATOM   2957  CZ  PHE   193      53.592  56.484  22.515
ATOM   2958  HZ  PHE   193      54.369  55.775  22.757
ATOM   2959  CE2 PHE   193      53.374  56.695  21.169
ATOM   2960  HE2 PHE   193      53.958  56.118  20.467
ATOM   2961  CD2 PHE   193      52.369  57.542  20.752
ATOM   2962  HD2 PHE   193      52.316  57.744  19.692
ATOM   2963  C   PHE   193      51.520  60.264  19.020
ATOM   2964  O   PHE   193      52.719  60.138  18.736
ATOM   2965  N   ALA   194      50.529  60.184  18.095
ATOM   2966  H   ALA   194      49.593  60.331  18.444
ATOM   2967  CA  ALA   194      50.847  60.137  16.658
ATOM   2968  HA  ALA   194      51.281  59.173  16.395
ATOM   2969  CB  ALA   194      49.514  60.214  15.968
ATOM   2970  HB1 ALA   194      48.828  59.403  16.209
ATOM   2971  HB2 ALA   194      49.052  61.170  16.218
ATOM   2972  HB3 ALA   194      49.749  60.065  14.915
ATOM   2973  C   ALA   194      51.880  61.264  16.257
ATOM   2974  O   ALA   194      52.826  61.012  15.518
ATOM   2975  N   GLU   195      51.652  62.512  16.752
ATOM   2976  H   GLU   195      50.793  62.666  17.260
ATOM   2977  CA  GLU   195      52.463  63.697  16.490
ATOM   2978  HA  GLU   195      52.654  63.767  15.419
ATOM   2979  CB  GLU   195      51.758  65.064  16.943
ATOM   2980  HB2 GLU   195      51.299  64.835  17.905
ATOM   2981  HB3 GLU   195      52.586  65.761  17.078
ATOM   2982  CG  GLU   195      50.710  65.542  15.913
ATOM   2983  HG2 GLU   195      51.271  66.010  15.104
ATOM   2984  HG3 GLU   195      50.236  64.654  15.496
ATOM   2985  CD  GLU   195      49.698  66.417  16.596
ATOM   2986  OE1 GLU   195      48.566  65.982  17.013
ATOM   2987  OE2 GLU   195      49.913  67.657  16.702
ATOM   2988  C   GLU   195      53.861  63.524  17.133
ATOM   2989  O   GLU   195      54.925  63.763  16.514
ATOM   2990  N   ALA   196      53.870  63.015  18.413
ATOM   2991  H   ALA   196      52.966  62.760  18.781
ATOM   2992  CA  ALA   196      55.114  62.710  19.124
ATOM   2993  HA  ALA   196      55.699  63.616  19.282
ATOM   2994  CB  ALA   196      54.759  62.150  20.520
ATOM   2995  HB1 ALA   196      54.437  61.115  20.416
ATOM   2996  HB2 ALA   196      55.658  62.261  21.126
ATOM   2997  HB3 ALA   196      53.928  62.712  20.949
ATOM   2998  C   ALA   196      56.011  61.746  18.361
ATOM   2999  O   ALA   196      57.157  61.953  18.123
ATOM   3000  N   LYS   197      55.371  60.669  17.895
ATOM   3001  H   LYS   197      54.392  60.665  18.144
ATOM   3002  CA  LYS   197      55.968  59.573  17.111
ATOM   3003  HA  LYS   197      56.893  59.329  17.634
ATOM   3004  CB  LYS   197      54.985  58.324  17.073
ATOM   3005  HB2 LYS   197      54.460  58.155  18.012
ATOM   3006  HB3 LYS   197      54.144  58.589  16.432
ATOM   3007  CG  LYS   197      55.663  57.069  16.533
ATOM   3008  HG2 LYS   197      56.146  57.306  15.585
ATOM   3009  HG3 LYS   197      56.346  56.726  17.310
ATOM   3010  CD  LYS   197      54.562  55.983  16.393
ATOM   3011  HD2 LYS   197      55.135  55.087  16.153
ATOM   3012  HD3 LYS   197      53.919  55.966  17.273
ATOM   3013  CE  LYS   197      53.876  56.298  15.133
ATOM   3014  HE2 LYS   197      53.278  57.181  15.356
ATOM   3015  HE3 LYS   197      54.631  56.531  14.382
ATOM   3016  NZ  LYS   197      52.994  55.172  14.765
ATOM   3017  HZ1 LYS   197      52.420  54.986  15.575
ATOM   3018  HZ2 LYS   197      52.308  55.505  14.102
ATOM   3019  HZ3 LYS   197      53.589  54.390  14.530
ATOM   3020  C   LYS   197      56.447  59.989  15.770
ATOM   3021  O   LYS   197      57.548  59.728  15.340
ATOM   3022  N   GLU   198      55.686  60.944  15.168
ATOM   3023  H   GLU   198      54.803  61.208  15.580
ATOM   3024  CA  GLU   198      55.982  61.521  13.816
ATOM   3025  HA  GLU   198      56.377  60.671  13.260
ATOM   3026  CB  GLU   198      54.773  62.124  13.138
ATOM   3027  HB2 GLU   198      53.819  61.626  13.310
ATOM   3028  HB3 GLU   198      54.639  63.146  13.492
ATOM   3029  CG  GLU   198      54.932  62.094  11.622
ATOM   3030  HG2 GLU   198      54.176  62.761  11.211
ATOM   3031  HG3 GLU   198      55.864  62.580  11.332
ATOM   3032  CD  GLU   198      54.783  60.674  10.994
ATOM   3033  OE1 GLU   198      55.787  59.923  11.073
ATOM   3034  OE2 GLU   198      53.845  60.369  10.245
ATOM   3035  C   GLU   198      57.182  62.396  13.849
ATOM   3036  O   GLU   198      58.130  62.303  13.037
ATOM   3037  N   ALA   199      57.273  63.228  14.823
ATOM   3038  H   ALA   199      56.485  63.289  15.453
ATOM   3039  CA  ALA   199      58.384  64.060  15.129
ATOM   3040  HA  ALA   199      58.615  64.406  14.122
ATOM   3041  CB  ALA   199      58.086  65.301  16.002
ATOM   3042  HB1 ALA   199      57.361  65.959  15.523
ATOM   3043  HB2 ALA   199      57.805  64.936  16.990
ATOM   3044  HB3 ALA   199      59.024  65.827  16.178
ATOM   3045  C   ALA   199      59.682  63.300  15.676
ATOM   3046  O   ALA   199      60.796  63.700  15.280
ATOM   3047  N   LEU   200      59.528  62.267  16.483
ATOM   3048  H   LEU   200      58.616  61.969  16.797
ATOM   3049  CA  LEU   200      60.630  61.436  16.811
ATOM   3050  HA  LEU   200      61.461  62.013  17.216
ATOM   3051  CB  LEU   200      60.127  60.536  17.913
ATOM   3052  HB2 LEU   200      59.597  61.040  18.720
ATOM   3053  HB3 LEU   200      59.457  59.734  17.602
ATOM   3054  CG  LEU   200      61.353  59.787  18.586
ATOM   3055  HG  LEU   200      62.083  59.544  17.814
ATOM   3056  CD1 LEU   200      62.163  60.670  19.570
ATOM   3057 HD11 LEU   200      61.469  60.818  20.397
ATOM   3058 HD12 LEU   200      63.001  60.082  19.944
ATOM   3059 HD13 LEU   200      62.420  61.636  19.136
ATOM   3060  CD2 LEU   200      60.698  58.660  19.356
ATOM   3061 HD21 LEU   200      60.082  57.985  18.762
ATOM   3062 HD22 LEU   200      61.506  58.133  19.863
ATOM   3063 HD23 LEU   200      60.021  59.137  20.064
ATOM   3064  C   LEU   200      61.101  60.645  15.518
ATOM   3065  O   LEU   200      62.293  60.527  15.292
ATOM   3066  N   TYR   201      60.171  60.140  14.707
ATOM   3067  H   TYR   201      59.191  60.199  14.942
ATOM   3068  CA  TYR   201      60.624  59.336  13.535
ATOM   3069  HA  TYR   201      61.350  58.603  13.889
ATOM   3070  CB  TYR   201      59.521  58.584  12.943
ATOM   3071  HB2 TYR   201      58.593  59.142  12.825
ATOM   3072  HB3 TYR   201      59.935  58.346  11.962
ATOM   3073  CG  TYR   201      59.106  57.307  13.660
ATOM   3074  CD1 TYR   201      59.567  56.974  14.946
ATOM   3075  HD1 TYR   201      60.368  57.527  15.414
ATOM   3076  CE1 TYR   201      59.117  55.898  15.672
ATOM   3077  HE1 TYR   201      59.631  55.626  16.582
ATOM   3078  CZ  TYR   201      58.106  55.081  15.084
ATOM   3079  OH  TYR   201      57.641  53.991  15.654
ATOM   3080  HH  TYR   201      58.103  53.854  16.485
ATOM   3081  CE2 TYR   201      57.624  55.427  13.816
ATOM   3082  HE2 TYR   201      56.858  54.844  13.327
ATOM   3083  CD2 TYR   201      58.082  56.545  13.086
ATOM   3084  HD2 TYR   201      57.715  56.809  12.106
ATOM   3085  C   TYR   201      61.338  60.207  12.503
ATOM   3086  O   TYR   201      62.164  59.691  11.783
ATOM   3087  N   ASP   202      60.963  61.517  12.414
ATOM   3088  H   ASP   202      60.190  61.864  12.964
ATOM   3089  CA  ASP   202      61.686  62.447  11.480
ATOM   3090  HA  ASP   202      61.835  61.880  10.561
ATOM   3091  CB  ASP   202      60.929  63.753  11.231
ATOM   3092  HB2 ASP   202      59.867  63.522  11.152
ATOM   3093  HB3 ASP   202      60.893  64.316  12.164
ATOM   3094  CG  ASP   202      61.443  64.689  10.104
ATOM   3095  OD1 ASP   202      62.045  65.744  10.431
ATOM   3096  OD2 ASP   202      61.387  64.304   8.930
ATOM   3097  C   ASP   202      63.095  62.891  12.083
ATOM   3098  O   ASP   202      64.024  63.135  11.324
ATOM   3099  N   TYR   203      63.190  63.001  13.362
ATOM   3100  H   TYR   203      62.450  62.750  14.003
ATOM   3101  CA  TYR   203      64.475  63.207  14.034
ATOM   3102  HA  TYR   203      65.088  63.980  13.573
ATOM   3103  CB  TYR   203      64.213  63.637  15.439
ATOM   3104  HB2 TYR   203      63.723  64.608  15.365
ATOM   3105  HB3 TYR   203      63.488  62.950  15.876
ATOM   3106  CG  TYR   203      65.441  63.675  16.297
ATOM   3107  CD1 TYR   203      66.157  64.868  16.355
ATOM   3108  HD1 TYR   203      65.791  65.711  15.788
ATOM   3109  CE1 TYR   203      67.444  64.850  16.993
ATOM   3110  HE1 TYR   203      68.035  65.754  17.040
ATOM   3111  CZ  TYR   203      67.893  63.620  17.606
ATOM   3112  OH  TYR   203      69.054  63.550  18.294
ATOM   3113  HH  TYR   203      69.660  64.294  18.316
ATOM   3114  CE2 TYR   203      67.029  62.457  17.590
ATOM   3115  HE2 TYR   203      67.440  61.569  18.047
ATOM   3116  CD2 TYR   203      65.804  62.473  16.922
ATOM   3117  HD2 TYR   203      65.313  61.518  16.805
ATOM   3118  C   TYR   203      65.403  62.035  13.919
ATOM   3119  O   TYR   203      66.597  62.181  13.800
ATOM   3120  N   LEU   204      64.866  60.850  13.952
ATOM   3121  H   LEU   204      63.888  60.810  14.202
ATOM   3122  CA  LEU   204      65.639  59.631  13.870
ATOM   3123  HA  LEU   204      66.476  59.735  14.560
ATOM   3124  CB  LEU   204      64.862  58.409  14.358
ATOM   3125  HB2 LEU   204      63.871  58.357  13.906
ATOM   3126  HB3 LEU   204      65.400  57.510  14.057
ATOM   3127  CG  LEU   204      64.659  58.450  15.906
ATOM   3128  HG  LEU   204      64.196  59.353  16.303
ATOM   3129  CD1 LEU   204      63.811  57.240  16.239
ATOM   3130 HD11 LEU   204      64.189  56.302  15.833
ATOM   3131 HD12 LEU   204      63.661  57.045  17.301
ATOM   3132 HD13 LEU   204      62.817  57.316  15.799
ATOM   3133  CD2 LEU   204      66.025  58.258  16.641
ATOM   3134 HD21 LEU   204      65.797  58.073  17.691
ATOM   3135 HD22 LEU   204      66.566  57.399  16.247
ATOM   3136 HD23 LEU   204      66.441  59.257  16.770
ATOM   3137  C   LEU   204      66.212  59.375  12.423
ATOM   3138  O   LEU   204      67.357  59.032  12.217
ATOM   3139  N   ILE   205      65.421  59.607  11.383
ATOM   3140  H   ILE   205      64.546  60.050  11.624
ATOM   3141  CA  ILE   205      65.739  59.187   9.977
ATOM   3142  HA  ILE   205      65.861  58.109  10.085
ATOM   3143  CB  ILE   205      64.467  59.381   9.108
ATOM   3144  HB  ILE   205      63.889  60.209   9.520
ATOM   3145  CG2 ILE   205      64.747  59.692   7.668
ATOM   3146 HG21 ILE   205      65.246  60.656   7.769
ATOM   3147 HG22 ILE   205      65.289  58.966   7.063
ATOM   3148 HG23 ILE   205      63.771  59.950   7.255
ATOM   3149  CG1 ILE   205      63.561  58.111   9.276
ATOM   3150 HG12 ILE   205      63.449  57.906  10.341
ATOM   3151 HG13 ILE   205      62.581  58.382   8.885
ATOM   3152  CD1 ILE   205      64.034  56.923   8.460
ATOM   3153 HD11 ILE   205      63.278  56.181   8.717
ATOM   3154 HD12 ILE   205      63.890  57.044   7.386
ATOM   3155 HD13 ILE   205      65.022  56.540   8.712
ATOM   3156  C   ILE   205      67.000  59.687   9.320
ATOM   3157  O   ILE   205      67.590  58.890   8.623
ATOM   3158  N   PRO   206      67.396  60.936   9.498
ATOM   3159  CD  PRO   206      66.476  62.042   9.947
ATOM   3160  HD2 PRO   206      66.551  62.169  11.027
ATOM   3161  HD3 PRO   206      65.446  61.892   9.629
ATOM   3162  CG  PRO   206      67.036  63.279   9.167
ATOM   3163  HG2 PRO   206      66.698  64.211   9.621
ATOM   3164  HG3 PRO   206      66.764  63.184   8.116
ATOM   3165  CB  PRO   206      68.517  63.031   9.313
ATOM   3166  HB2 PRO   206      68.788  63.309  10.331
ATOM   3167  HB3 PRO   206      69.133  63.572   8.595
ATOM   3168  CA  PRO   206      68.694  61.502   9.072
ATOM   3169  HA  PRO   206      68.853  61.336   8.007
ATOM   3170  C   PRO   206      69.878  60.836   9.783
ATOM   3171  O   PRO   206      70.731  60.233   9.142
ATOM   3172  N   ILE   207      69.760  60.728  11.147
ATOM   3173  H   ILE   207      68.968  61.195  11.566
ATOM   3174  CA  ILE   207      70.740  59.982  11.916
ATOM   3175  HA  ILE   207      71.712  60.421  11.689
ATOM   3176  CB  ILE   207      70.423  60.146  13.420
ATOM   3177  HB  ILE   207      69.354  60.249  13.604
ATOM   3178  CG2 ILE   207      70.819  58.930  14.236
ATOM   3179 HG21 ILE   207      70.584  57.996  13.725
ATOM   3180 HG22 ILE   207      71.897  58.930  14.398
ATOM   3181 HG23 ILE   207      70.334  58.851  15.208
ATOM   3182  CG1 ILE   207      71.184  61.377  14.042
ATOM   3183 HG12 ILE   207      72.254  61.197  14.151
ATOM   3184 HG13 ILE   207      70.926  62.294  13.514
ATOM   3185  CD1 ILE   207      70.610  61.644  15.476
ATOM   3186 HD11 ILE   207      70.983  62.547  15.959
ATOM   3187 HD12 ILE   207      69.520  61.611  15.501
ATOM   3188 HD13 ILE   207      71.051  60.861  16.093
ATOM   3189  C   ILE   207      70.849  58.540  11.435
ATOM   3190  O   ILE   207      71.977  58.078  11.321
ATOM   3191  N   ILE   208      69.791  57.820  11.188
ATOM   3192  H   ILE   208      68.901  58.272  11.341
ATOM   3193  CA  ILE   208      69.813  56.394  10.736
ATOM   3194  HA  ILE   208      70.512  55.818  11.343
ATOM   3195  CB  ILE   208      68.439  55.702  10.927
ATOM   3196  HB  ILE   208      67.865  56.129  10.104
ATOM   3197  CG2 ILE   208      68.724  54.201  10.668
ATOM   3198 HG21 ILE   208      67.739  53.803  10.425
ATOM   3199 HG22 ILE   208      69.385  54.139   9.802
ATOM   3200 HG23 ILE   208      69.210  53.752  11.534
ATOM   3201  CG1 ILE   208      67.736  55.741  12.277
ATOM   3202 HG12 ILE   208      68.285  55.147  13.008
ATOM   3203 HG13 ILE   208      67.772  56.752  12.684
ATOM   3204  CD1 ILE   208      66.299  55.303  12.089
ATOM   3205 HD11 ILE   208      66.310  54.256  11.790
ATOM   3206 HD12 ILE   208      65.751  55.575  12.991
ATOM   3207 HD13 ILE   208      65.906  55.896  11.263
ATOM   3208  C   ILE   208      70.466  56.244   9.350
ATOM   3209  O   ILE   208      71.483  55.589   9.259
ATOM   3210  N   GLU   209      69.998  56.988   8.397
ATOM   3211  H   GLU   209      69.235  57.616   8.605
ATOM   3212  CA  GLU   209      70.532  56.849   7.024
ATOM   3213  HA  GLU   209      70.569  55.831   6.637
ATOM   3214  CB  GLU   209      69.549  57.651   6.197
ATOM   3215  HB2 GLU   209      69.367  58.646   6.605
ATOM   3216  HB3 GLU   209      69.993  57.894   5.231
ATOM   3217  CG  GLU   209      68.147  57.014   5.997
ATOM   3218  HG2 GLU   209      67.734  56.589   6.913
ATOM   3219  HG3 GLU   209      67.400  57.764   5.739
ATOM   3220  CD  GLU   209      68.120  55.915   5.056
ATOM   3221  OE1 GLU   209      68.796  55.864   4.068
ATOM   3222  OE2 GLU   209      67.154  55.104   5.169
ATOM   3223  C   GLU   209      71.953  57.406   6.912
ATOM   3224  O   GLU   209      72.599  57.129   5.937
ATOM   3225  N   GLN   210      72.416  58.198   7.841
ATOM   3226  H   GLN   210      71.930  58.473   8.683
ATOM   3227  CA  GLN   210      73.798  58.573   7.877
ATOM   3228  HA  GLN   210      74.121  58.877   6.882
ATOM   3229  CB  GLN   210      73.926  59.877   8.747
ATOM   3230  HB2 GLN   210      73.218  60.615   8.368
ATOM   3231  HB3 GLN   210      73.680  59.649   9.784
ATOM   3232  CG  GLN   210      75.288  60.484   8.666
ATOM   3233  HG2 GLN   210      75.444  61.106   9.548
ATOM   3234  HG3 GLN   210      75.956  59.622   8.638
ATOM   3235  CD  GLN   210      75.543  61.218   7.330
ATOM   3236  OE1 GLN   210      75.951  60.596   6.392
ATOM   3237  NE2 GLN   210      75.508  62.510   7.189
ATOM   3238 HE21 GLN   210      75.816  62.826   6.280
ATOM   3239 HE22 GLN   210      75.220  63.113   7.947
ATOM   3240  C   GLN   210      74.601  57.364   8.353
ATOM   3241  O   GLN   210      75.396  56.887   7.528
ATOM   3242  N   ARG   211      74.335  56.763   9.469
ATOM   3243  H   ARG   211      73.580  57.120  10.038
ATOM   3244  CA  ARG   211      75.052  55.568  10.030
ATOM   3245  HA  ARG   211      76.121  55.650  10.227
ATOM   3246  CB  ARG   211      74.268  54.940  11.239
ATOM   3247  HB2 ARG   211      73.308  54.557  10.894
ATOM   3248  HB3 ARG   211      74.776  54.090  11.693
ATOM   3249  CG  ARG   211      74.126  55.834  12.461
ATOM   3250  HG2 ARG   211      73.290  56.512  12.285
ATOM   3251  HG3 ARG   211      73.777  55.224  13.295
ATOM   3252  CD  ARG   211      75.293  56.720  12.864
ATOM   3253  HD2 ARG   211      76.170  56.149  12.561
ATOM   3254  HD3 ARG   211      75.309  57.564  12.174
ATOM   3255  NE  ARG   211      75.180  57.022  14.295
ATOM   3256  HE  ARG   211      75.059  56.257  14.945
ATOM   3257  CZ  ARG   211      75.226  58.143  14.883
ATOM   3258  NH1 ARG   211      75.295  59.331  14.229
ATOM   3259 HH11 ARG   211      75.272  59.299  13.220
ATOM   3260 HH12 ARG   211      75.034  60.148  14.762
ATOM   3261  NH2 ARG   211      75.224  58.230  16.205
ATOM   3262 HH21 ARG   211      74.972  57.390  16.706
ATOM   3263 HH22 ARG   211      75.239  59.187  16.528
ATOM   3264  C   ARG   211      75.011  54.523   8.919
ATOM   3265  O   ARG   211      76.013  53.806   8.805
ATOM   3266  N   ARG   212      73.931  54.402   8.117
ATOM   3267  H   ARG   212      73.185  55.063   8.277
ATOM   3268  CA  ARG   212      73.942  53.471   7.027
ATOM   3269  HA  ARG   212      74.135  52.502   7.486
ATOM   3270  CB  ARG   212      72.624  53.407   6.291
ATOM   3271  HB2 ARG   212      72.328  54.382   5.905
ATOM   3272  HB3 ARG   212      72.730  52.738   5.437
ATOM   3273  CG  ARG   212      71.521  52.876   7.165
ATOM   3274  HG2 ARG   212      71.726  51.850   7.469
ATOM   3275  HG3 ARG   212      71.363  53.471   8.064
ATOM   3276  CD  ARG   212      70.130  52.962   6.482
ATOM   3277  HD2 ARG   212      69.504  52.153   6.859
ATOM   3278  HD3 ARG   212      69.703  53.919   6.782
ATOM   3279  NE  ARG   212      70.229  52.827   4.985
ATOM   3280  HE  ARG   212      70.377  53.664   4.439
ATOM   3281  CZ  ARG   212      69.768  51.829   4.289
ATOM   3282  NH1 ARG   212      69.250  50.747   4.805
ATOM   3283 HH11 ARG   212      69.177  50.544   5.792
ATOM   3284 HH12 ARG   212      68.694  50.095   4.272
ATOM   3285  NH2 ARG   212      69.777  51.819   2.969
ATOM   3286 HH21 ARG   212      70.332  52.522   2.502
ATOM   3287 HH22 ARG   212      69.376  51.050   2.452
ATOM   3288  C   ARG   212      75.059  53.641   6.074
ATOM   3289  O   ARG   212      75.570  52.600   5.587
ATOM   3290  N   GLN   213      75.573  54.801   5.741
ATOM   3291  H   GLN   213      75.244  55.602   6.262
ATOM   3292  CA  GLN   213      76.718  55.028   4.953
ATOM   3293  HA  GLN   213      76.775  54.222   4.221
ATOM   3294  CB  GLN   213      76.597  56.404   4.381
ATOM   3295  HB2 GLN   213      76.563  57.137   5.187
ATOM   3296  HB3 GLN   213      77.445  56.732   3.779
ATOM   3297  CG  GLN   213      75.358  56.659   3.534
ATOM   3298  HG2 GLN   213      74.439  56.785   4.107
ATOM   3299  HG3 GLN   213      75.564  57.568   2.970
ATOM   3300  CD  GLN   213      75.094  55.485   2.565
ATOM   3301  OE1 GLN   213      74.547  54.461   2.906
ATOM   3302  NE2 GLN   213      75.609  55.577   1.390
ATOM   3303 HE21 GLN   213      75.358  54.866   0.718
ATOM   3304 HE22 GLN   213      75.967  56.454   1.040
ATOM   3305  C   GLN   213      77.972  55.039   5.848
ATOM   3306  O   GLN   213      79.033  54.798   5.450
ATOM   3307  N   LYS   214      77.843  55.421   7.119
ATOM   3308  H   LYS   214      76.926  55.692   7.444
ATOM   3309  CA  LYS   214      78.926  55.871   7.933
ATOM   3310  HA  LYS   214      79.849  55.596   7.421
ATOM   3311  CB  LYS   214      78.982  57.413   8.036
ATOM   3312  HB2 LYS   214      78.222  57.640   8.784
ATOM   3313  HB3 LYS   214      79.913  57.753   8.489
ATOM   3314  CG  LYS   214      78.792  58.341   6.861
ATOM   3315  HG2 LYS   214      79.437  57.992   6.053
ATOM   3316  HG3 LYS   214      77.761  58.366   6.509
ATOM   3317  CD  LYS   214      79.232  59.778   7.266
ATOM   3318  HD2 LYS   214      78.610  60.066   8.114
ATOM   3319  HD3 LYS   214      80.291  59.831   7.516
ATOM   3320  CE  LYS   214      78.945  60.705   6.101
ATOM   3321  HE2 LYS   214      79.723  60.474   5.373
ATOM   3322  HE3 LYS   214      77.960  60.509   5.676
ATOM   3323  NZ  LYS   214      78.962  62.134   6.510
ATOM   3324  HZ1 LYS   214      78.904  62.596   5.614
ATOM   3325  HZ2 LYS   214      78.251  62.349   7.195
ATOM   3326  HZ3 LYS   214      79.798  62.446   6.983
ATOM   3327  C   LYS   214      78.932  55.127   9.295
ATOM   3328  O   LYS   214      78.874  55.756  10.399
ATOM   3329  N   PRO   215      78.923  53.768   9.318
ATOM   3330  CD  PRO   215      78.980  52.880   8.271
ATOM   3331  HD2 PRO   215      79.758  53.096   7.538
ATOM   3332  HD3 PRO   215      78.016  52.807   7.769
ATOM   3333  CG  PRO   215      79.295  51.429   8.836
ATOM   3334  HG2 PRO   215      80.365  51.250   8.934
ATOM   3335  HG3 PRO   215      78.936  50.665   8.147
ATOM   3336  CB  PRO   215      78.638  51.569  10.246
ATOM   3337  HB2 PRO   215      79.242  51.095  11.020
ATOM   3338  HB3 PRO   215      77.614  51.194  10.279
ATOM   3339  CA  PRO   215      78.706  53.046  10.607
ATOM   3340  HA  PRO   215      77.742  53.228  11.084
ATOM   3341  C   PRO   215      79.956  53.432  11.589
ATOM   3342  O   PRO   215      81.110  53.488  11.098
ATOM   3343  N   GLY   216      79.766  53.630  12.892
ATOM   3344  H   GLY   216      78.818  53.558  13.234
ATOM   3345  CA  GLY   216      80.800  53.626  13.856
ATOM   3346  HA2 GLY   216      81.792  53.417  13.456
ATOM   3347  HA3 GLY   216      80.821  54.664  14.188
ATOM   3348  C   GLY   216      80.540  52.849  15.094
ATOM   3349  O   GLY   216      79.529  52.140  15.007
ATOM   3350  N   THR   217      81.229  52.848  16.239
ATOM   3351  H   THR   217      82.032  53.452  16.349
ATOM   3352  CA  THR   217      80.855  52.227  17.483
ATOM   3353  HA  THR   217      80.407  51.238  17.385
ATOM   3354  CB  THR   217      82.104  51.906  18.458
ATOM   3355  HB  THR   217      81.792  51.520  19.428
ATOM   3356  CG2 THR   217      83.122  50.915  17.964
ATOM   3357 HG21 THR   217      82.533  49.998  17.962
ATOM   3358 HG22 THR   217      83.346  51.095  16.913
ATOM   3359 HG23 THR   217      84.002  50.705  18.572
ATOM   3360  OG1 THR   217      82.707  53.175  18.707
ATOM   3361  HG1 THR   217      82.041  53.778  19.044
ATOM   3362  C   THR   217      79.811  53.053  18.236
ATOM   3363  O   THR   217      80.245  54.008  18.953
ATOM   3364  N   ASP   218      78.573  52.644  18.099
ATOM   3365  H   ASP   218      78.432  52.041  17.302
ATOM   3366  CA  ASP   218      77.434  53.171  18.802
ATOM   3367  HA  ASP   218      77.639  53.138  19.873
ATOM   3368  CB  ASP   218      77.194  54.691  18.440
ATOM   3369  HB2 ASP   218      76.363  55.040  19.052
ATOM   3370  HB3 ASP   218      78.080  55.245  18.747
ATOM   3371  CG  ASP   218      76.769  54.982  16.985
ATOM   3372  OD1 ASP   218      75.513  55.023  16.680
ATOM   3373  OD2 ASP   218      77.663  55.291  16.150
ATOM   3374  C   ASP   218      76.185  52.355  18.397
ATOM   3375  O   ASP   218      75.936  51.857  17.262
ATOM   3376  N   ALA   219      75.265  52.211  19.333
ATOM   3377  H   ALA   219      75.530  52.562  20.243
ATOM   3378  CA  ALA   219      73.973  51.435  19.263
ATOM   3379  HA  ALA   219      74.222  50.374  19.269
ATOM   3380  CB  ALA   219      73.163  51.851  20.491
ATOM   3381  HB1 ALA   219      72.083  51.739  20.386
ATOM   3382  HB2 ALA   219      73.569  51.424  21.408
ATOM   3383  HB3 ALA   219      73.332  52.923  20.592
ATOM   3384  C   ALA   219      73.065  51.719  17.979
ATOM   3385  O   ALA   219      72.466  50.841  17.447
ATOM   3386  N   ILE   220      73.089  52.950  17.495
ATOM   3387  H   ILE   220      73.710  53.596  17.962
ATOM   3388  CA  ILE   220      72.292  53.374  16.371
ATOM   3389  HA  ILE   220      71.252  53.076  16.505
ATOM   3390  CB  ILE   220      72.128  54.862  16.352
ATOM   3391  HB  ILE   220      73.067  55.378  16.156
ATOM   3392  CG2 ILE   220      71.107  55.207  15.178
ATOM   3393 HG21 ILE   220      70.148  54.699  15.289
ATOM   3394 HG22 ILE   220      70.962  56.285  15.119
ATOM   3395 HG23 ILE   220      71.584  54.930  14.238
ATOM   3396  CG1 ILE   220      71.596  55.570  17.567
ATOM   3397 HG12 ILE   220      72.258  55.316  18.395
ATOM   3398 HG13 ILE   220      71.724  56.646  17.448
ATOM   3399  CD1 ILE   220      70.149  55.274  17.943
ATOM   3400 HD11 ILE   220      69.852  55.993  18.706
ATOM   3401 HD12 ILE   220      69.433  55.454  17.142
ATOM   3402 HD13 ILE   220      69.966  54.212  18.108
ATOM   3403  C   ILE   220      72.939  52.886  15.114
ATOM   3404  O   ILE   220      72.251  52.343  14.271
ATOM   3405  N   SER   221      74.271  52.855  15.049
ATOM   3406  H   SER   221      74.804  53.395  15.715
ATOM   3407  CA  SER   221      74.930  52.164  14.015
ATOM   3408  HA  SER   221      74.534  52.457  13.042
ATOM   3409  CB  SER   221      76.445  52.480  14.063
ATOM   3410  HB2 SER   221      76.828  52.147  15.028
ATOM   3411  HB3 SER   221      76.907  51.775  13.371
ATOM   3412  OG  SER   221      76.723  53.856  13.796
ATOM   3413  HG  SER   221      76.950  54.245  14.645
ATOM   3414  C   SER   221      74.704  50.661  14.048
ATOM   3415  O   SER   221      74.561  50.068  12.946
ATOM   3416  N   ILE   222      74.556  50.077  15.226
ATOM   3417  H   ILE   222      74.664  50.656  16.046
ATOM   3418  CA  ILE   222      74.093  48.703  15.253
ATOM   3419  HA  ILE   222      74.713  48.144  14.553
ATOM   3420  CB  ILE   222      74.346  48.074  16.655
ATOM   3421  HB  ILE   222      73.564  48.458  17.310
ATOM   3422  CG2 ILE   222      74.099  46.548  16.612
ATOM   3423 HG21 ILE   222      74.247  46.056  17.574
ATOM   3424 HG22 ILE   222      73.065  46.359  16.326
ATOM   3425 HG23 ILE   222      74.827  46.072  15.954
ATOM   3426  CG1 ILE   222      75.768  48.348  17.268
ATOM   3427 HG12 ILE   222      75.895  49.403  17.513
ATOM   3428 HG13 ILE   222      75.854  47.854  18.236
ATOM   3429  CD1 ILE   222      77.090  48.002  16.478
ATOM   3430 HD11 ILE   222      77.361  46.947  16.437
ATOM   3431 HD12 ILE   222      77.035  48.218  15.411
ATOM   3432 HD13 ILE   222      77.912  48.580  16.900
ATOM   3433  C   ILE   222      72.674  48.462  14.754
ATOM   3434  O   ILE   222      72.527  47.619  13.841
ATOM   3435  N   VAL   223      71.719  49.278  15.213
ATOM   3436  H   VAL   223      71.923  49.799  16.054
ATOM   3437  CA  VAL   223      70.242  49.221  14.864
ATOM   3438  HA  VAL   223      70.011  48.157  14.891
ATOM   3439  CB  VAL   223      69.430  49.919  15.929
ATOM   3440  HB  VAL   223      69.965  50.022  16.873
ATOM   3441  CG1 VAL   223      69.087  51.334  15.607
ATOM   3442 HG11 VAL   223      69.788  51.920  15.012
ATOM   3443 HG12 VAL   223      68.220  51.331  14.947
ATOM   3444 HG13 VAL   223      68.905  51.922  16.506
ATOM   3445  CG2 VAL   223      68.056  49.216  16.224
ATOM   3446 HG21 VAL   223      68.098  48.279  16.780
ATOM   3447 HG22 VAL   223      67.390  49.830  16.830
ATOM   3448 HG23 VAL   223      67.491  49.212  15.292
ATOM   3449  C   VAL   223      69.949  49.696  13.426
ATOM   3450  O   VAL   223      68.947  49.423  12.836
ATOM   3451  N   ALA   224      70.986  50.271  12.727
ATOM   3452  H   ALA   224      71.806  50.545  13.248
ATOM   3453  CA  ALA   224      70.864  50.665  11.331
ATOM   3454  HA  ALA   224      69.841  50.851  11.008
ATOM   3455  CB  ALA   224      71.683  51.934  11.147
ATOM   3456  HB1 ALA   224      71.524  52.691  11.915
ATOM   3457  HB2 ALA   224      72.736  51.657  11.222
ATOM   3458  HB3 ALA   224      71.438  52.346  10.169
ATOM   3459  C   ALA   224      71.455  49.582  10.417
ATOM   3460  O   ALA   224      71.292  49.618   9.184
ATOM   3461  N   ASN   225      72.188  48.595  10.955
ATOM   3462  H   ASN   225      72.247  48.526  11.961
ATOM   3463  CA  ASN   225      72.906  47.632  10.098
ATOM   3464  HA  ASN   225      72.525  47.576   9.078
ATOM   3465  CB  ASN   225      74.419  47.998   9.999
ATOM   3466  HB2 ASN   225      74.898  47.882  10.971
ATOM   3467  HB3 ASN   225      74.847  47.253   9.329
ATOM   3468  CG  ASN   225      74.665  49.319   9.325
ATOM   3469  OD1 ASN   225      74.436  49.484   8.094
ATOM   3470  ND2 ASN   225      75.212  50.270  10.133
ATOM   3471 HD21 ASN   225      75.579  51.095   9.681
ATOM   3472 HD22 ASN   225      75.347  49.948  11.080
ATOM   3473  C   ASN   225      72.907  46.141  10.444
ATOM   3474  O   ASN   225      73.452  45.316   9.660
ATOM   3475  N   GLY   226      72.415  45.693  11.630
ATOM   3476  H   GLY   226      72.202  46.390  12.329
ATOM   3477  CA  GLY   226      72.410  44.307  12.103
ATOM   3478  HA2 GLY   226      73.420  43.952  12.311
ATOM   3479  HA3 GLY   226      72.133  44.165  13.147
ATOM   3480  C   GLY   226      71.680  43.413  11.268
ATOM   3481  O   GLY   226      70.671  43.690  10.611
ATOM   3482  N   GLN   227      72.087  42.166  11.318
ATOM   3483  H   GLN   227      72.833  41.951  11.963
ATOM   3484  CA  GLN   227      71.339  41.211  10.450
ATOM   3485  HA  GLN   227      70.823  41.716   9.634
ATOM   3486  CB  GLN   227      72.364  40.295   9.751
ATOM   3487  HB2 GLN   227      72.928  39.667  10.441
ATOM   3488  HB3 GLN   227      71.766  39.665   9.094
ATOM   3489  CG  GLN   227      73.487  40.948   8.941
ATOM   3490  HG2 GLN   227      74.120  41.504   9.631
ATOM   3491  HG3 GLN   227      74.052  40.138   8.477
ATOM   3492  CD  GLN   227      73.015  41.914   7.785
ATOM   3493  OE1 GLN   227      72.518  41.485   6.801
ATOM   3494  NE2 GLN   227      73.290  43.170   7.901
ATOM   3495 HE21 GLN   227      73.221  43.720   7.056
ATOM   3496 HE22 GLN   227      73.590  43.539   8.792
ATOM   3497  C   GLN   227      70.240  40.439  11.210
ATOM   3498  O   GLN   227      70.490  40.106  12.392
ATOM   3499  N   VAL   228      69.085  40.152  10.522
ATOM   3500  H   VAL   228      68.995  40.338   9.534
ATOM   3501  CA  VAL   228      67.902  39.540  11.162
ATOM   3502  HA  VAL   228      68.304  38.920  11.963
ATOM   3503  CB  VAL   228      66.841  40.598  11.626
ATOM   3504  HB  VAL   228      65.983  40.005  11.940
ATOM   3505  CG1 VAL   228      67.221  41.421  12.808
ATOM   3506 HG11 VAL   228      67.550  40.696  13.553
ATOM   3507 HG12 VAL   228      68.025  42.153  12.717
ATOM   3508 HG13 VAL   228      66.270  41.881  13.074
ATOM   3509  CG2 VAL   228      66.475  41.670  10.529
ATOM   3510 HG21 VAL   228      67.391  42.043  10.072
ATOM   3511 HG22 VAL   228      65.743  41.312   9.805
ATOM   3512 HG23 VAL   228      65.933  42.521  10.943
ATOM   3513  C   VAL   228      67.240  38.669  10.067
ATOM   3514  O   VAL   228      66.965  39.218   8.979
ATOM   3515  N   ASN   229      67.146  37.295  10.308
ATOM   3516  H   ASN   229      67.626  36.960  11.132
ATOM   3517  CA  ASN   229      66.583  36.332   9.351
ATOM   3518  HA  ASN   229      66.789  35.318   9.691
ATOM   3519  CB  ASN   229      65.024  36.415   9.384
ATOM   3520  HB2 ASN   229      64.714  36.463  10.427
ATOM   3521  HB3 ASN   229      64.841  37.442   9.070
ATOM   3522  CG  ASN   229      64.261  35.303   8.608
ATOM   3523  OD1 ASN   229      64.793  34.283   8.167
ATOM   3524  ND2 ASN   229      63.000  35.483   8.368
ATOM   3525 HD21 ASN   229      62.639  34.765   7.756
ATOM   3526 HD22 ASN   229      62.518  36.293   8.731
ATOM   3527  C   ASN   229      67.178  36.433   7.915
ATOM   3528  O   ASN   229      66.428  36.758   6.980
ATOM   3529  N   GLY   230      68.498  36.368   7.823
ATOM   3530  H   GLY   230      68.940  36.359   8.731
ATOM   3531  CA  GLY   230      69.196  36.302   6.515
ATOM   3532  HA2 GLY   230      70.179  35.849   6.650
ATOM   3533  HA3 GLY   230      68.679  35.592   5.869
ATOM   3534  C   GLY   230      69.259  37.698   5.781
ATOM   3535  O   GLY   230      69.992  37.757   4.771
ATOM   3536  N   ARG   231      68.567  38.761   6.264
ATOM   3537  H   ARG   231      68.015  38.578   7.090
ATOM   3538  CA  ARG   231      68.665  40.190   5.697
ATOM   3539  HA  ARG   231      69.341  40.235   4.842
ATOM   3540  CB  ARG   231      67.296  40.645   5.160
ATOM   3541  HB2 ARG   231      67.402  41.563   4.583
ATOM   3542  HB3 ARG   231      66.988  39.973   4.359
ATOM   3543  CG  ARG   231      66.223  40.758   6.226
ATOM   3544  HG2 ARG   231      66.051  39.749   6.600
ATOM   3545  HG3 ARG   231      66.484  41.455   7.021
ATOM   3546  CD  ARG   231      64.936  41.272   5.556
ATOM   3547  HD2 ARG   231      65.025  42.248   5.078
ATOM   3548  HD3 ARG   231      64.684  40.471   4.861
ATOM   3549  NE  ARG   231      63.834  41.347   6.569
ATOM   3550  HE  ARG   231      63.184  40.573   6.564
ATOM   3551  CZ  ARG   231      63.674  42.387   7.408
ATOM   3552  NH1 ARG   231      64.476  43.446   7.411
ATOM   3553 HH11 ARG   231      65.424  43.455   7.061
ATOM   3554 HH12 ARG   231      64.186  44.294   7.877
ATOM   3555  NH2 ARG   231      62.616  42.416   8.198
ATOM   3556 HH21 ARG   231      61.924  41.685   8.136
ATOM   3557 HH22 ARG   231      62.504  43.274   8.721
ATOM   3558  C   ARG   231      69.120  41.186   6.728
ATOM   3559  O   ARG   231      69.137  40.831   7.922
ATOM   3560  N   PRO   232      69.528  42.387   6.341
ATOM   3561  CD  PRO   232      69.893  42.894   5.017
ATOM   3562  HD2 PRO   232      69.234  42.481   4.253
ATOM   3563  HD3 PRO   232      70.931  42.720   4.735
ATOM   3564  CG  PRO   232      69.810  44.403   5.124
ATOM   3565  HG2 PRO   232      68.796  44.790   5.219
ATOM   3566  HG3 PRO   232      70.279  44.856   4.251
ATOM   3567  CB  PRO   232      70.522  44.651   6.444
ATOM   3568  HB2 PRO   232      70.336  45.651   6.834
ATOM   3569  HB3 PRO   232      71.566  44.467   6.189
ATOM   3570  CA  PRO   232      69.824  43.505   7.318
ATOM   3571  HA  PRO   232      70.487  43.239   8.141
ATOM   3572  C   PRO   232      68.449  44.050   7.844
ATOM   3573  O   PRO   232      67.444  43.966   7.152
ATOM   3574  N   ILE   233      68.482  44.715   8.922
ATOM   3575  H   ILE   233      69.342  44.545   9.423
ATOM   3576  CA  ILE   233      67.472  45.660   9.423
ATOM   3577  HA  ILE   233      66.512  45.144   9.408
ATOM   3578  CB  ILE   233      67.773  46.150  10.843
ATOM   3579  HB  ILE   233      67.933  45.236  11.415
ATOM   3580  CG2 ILE   233      69.098  47.015  10.910
ATOM   3581 HG21 ILE   233      69.813  46.635  10.181
ATOM   3582 HG22 ILE   233      68.836  48.018  10.574
ATOM   3583 HG23 ILE   233      69.499  46.985  11.924
ATOM   3584  CG1 ILE   233      66.572  46.929  11.505
ATOM   3585 HG12 ILE   233      66.582  47.944  11.111
ATOM   3586 HG13 ILE   233      65.587  46.476  11.387
ATOM   3587  CD1 ILE   233      66.721  47.220  13.041
ATOM   3588 HD11 ILE   233      66.536  46.316  13.622
ATOM   3589 HD12 ILE   233      67.761  47.474  13.245
ATOM   3590 HD13 ILE   233      66.026  47.987  13.384
ATOM   3591  C   ILE   233      67.284  46.862   8.498
ATOM   3592  O   ILE   233      68.305  47.355   7.991
ATOM   3593  N   THR   234      66.100  47.388   8.405
ATOM   3594  H   THR   234      65.326  46.974   8.903
ATOM   3595  CA  THR   234      65.797  48.598   7.662
ATOM   3596  HA  THR   234      66.611  48.854   6.984
ATOM   3597  CB  THR   234      64.594  48.441   6.726
ATOM   3598  HB  THR   234      64.528  49.213   5.959
ATOM   3599  CG2 THR   234      64.847  47.169   5.865
ATOM   3600 HG21 THR   234      64.072  47.148   5.098
ATOM   3601 HG22 THR   234      65.817  47.238   5.374
ATOM   3602 HG23 THR   234      64.933  46.198   6.353
ATOM   3603  OG1 THR   234      63.398  48.218   7.334
ATOM   3604  HG1 THR   234      63.581  47.375   7.755
ATOM   3605  C   THR   234      65.530  49.865   8.406
ATOM   3606  O   THR   234      65.298  49.828   9.611
ATOM   3607  N   SER   235      65.635  51.026   7.776
ATOM   3608  H   SER   235      65.717  51.040   6.769
ATOM   3609  CA  SER   235      65.566  52.309   8.542
ATOM   3610  HA  SER   235      66.319  52.273   9.330
ATOM   3611  CB  SER   235      65.899  53.515   7.615
ATOM   3612  HB2 SER   235      65.172  53.549   6.804
ATOM   3613  HB3 SER   235      65.986  54.461   8.148
ATOM   3614  OG  SER   235      67.231  53.318   7.074
ATOM   3615  HG  SER   235      67.247  53.911   6.319
ATOM   3616  C   SER   235      64.209  52.526   9.281
ATOM   3617  O   SER   235      64.213  52.913  10.497
ATOM   3618  N   ASP   236      63.132  52.068   8.668
ATOM   3619  H   ASP   236      63.241  51.855   7.687
ATOM   3620  CA  ASP   236      61.802  52.078   9.266
ATOM   3621  HA  ASP   236      61.646  53.056   9.722
ATOM   3622  CB  ASP   236      60.764  51.857   8.211
ATOM   3623  HB2 ASP   236      60.844  52.743   7.583
ATOM   3624  HB3 ASP   236      60.991  50.953   7.646
ATOM   3625  CG  ASP   236      59.369  51.720   8.785
ATOM   3626  OD1 ASP   236      58.654  52.733   8.881
ATOM   3627  OD2 ASP   236      59.018  50.562   9.074
ATOM   3628  C   ASP   236      61.641  51.059  10.400
ATOM   3629  O   ASP   236      60.794  51.208  11.234
ATOM   3630  N   GLU   237      62.476  50.013  10.487
ATOM   3631  H   GLU   237      63.073  49.754   9.714
ATOM   3632  CA  GLU   237      62.523  49.109  11.617
ATOM   3633  HA  GLU   237      61.504  49.042  11.998
ATOM   3634  CB  GLU   237      63.034  47.740  11.068
ATOM   3635  HB2 GLU   237      63.959  47.943  10.525
ATOM   3636  HB3 GLU   237      63.381  47.107  11.885
ATOM   3637  CG  GLU   237      62.114  46.900  10.280
ATOM   3638  HG2 GLU   237      61.528  46.346  11.014
ATOM   3639  HG3 GLU   237      61.559  47.570   9.622
ATOM   3640  CD  GLU   237      62.701  45.809   9.408
ATOM   3641  OE1 GLU   237      61.974  44.901   9.046
ATOM   3642  OE2 GLU   237      63.951  45.863   8.986
ATOM   3643  C   GLU   237      63.410  49.736  12.751
ATOM   3644  O   GLU   237      62.910  49.859  13.831
ATOM   3645  N   ALA   238      64.587  50.240  12.400
ATOM   3646  H   ALA   238      64.757  50.131  11.410
ATOM   3647  CA  ALA   238      65.562  51.028  13.176
ATOM   3648  HA  ALA   238      65.938  50.313  13.908
ATOM   3649  CB  ALA   238      66.671  51.445  12.198
ATOM   3650  HB1 ALA   238      67.449  51.939  12.779
ATOM   3651  HB2 ALA   238      67.085  50.525  11.786
ATOM   3652  HB3 ALA   238      66.348  52.083  11.374
ATOM   3653  C   ALA   238      64.874  52.215  13.980
ATOM   3654  O   ALA   238      65.028  52.161  15.189
ATOM   3655  N   LYS   239      64.062  53.013  13.245
ATOM   3656  H   LYS   239      64.021  52.814  12.256
ATOM   3657  CA  LYS   239      63.293  54.151  13.898
ATOM   3658  HA  LYS   239      64.011  54.683  14.523
ATOM   3659  CB  LYS   239      62.756  55.175  12.939
ATOM   3660  HB2 LYS   239      62.434  56.046  13.510
ATOM   3661  HB3 LYS   239      63.618  55.495  12.354
ATOM   3662  CG  LYS   239      61.540  54.664  12.101
ATOM   3663  HG2 LYS   239      61.885  53.660  11.853
ATOM   3664  HG3 LYS   239      60.721  54.643  12.819
ATOM   3665  CD  LYS   239      61.320  55.590  10.864
ATOM   3666  HD2 LYS   239      61.474  56.622  11.176
ATOM   3667  HD3 LYS   239      62.032  55.311  10.088
ATOM   3668  CE  LYS   239      59.891  55.384  10.362
ATOM   3669  HE2 LYS   239      59.739  54.344  10.073
ATOM   3670  HE3 LYS   239      59.171  55.418  11.181
ATOM   3671  NZ  LYS   239      59.481  56.387   9.348
ATOM   3672  HZ1 LYS   239      59.961  56.117   8.502
ATOM   3673  HZ2 LYS   239      58.498  56.359   9.113
ATOM   3674  HZ3 LYS   239      59.650  57.354   9.584
ATOM   3675  C   LYS   239      62.185  53.616  14.817
ATOM   3676  O   LYS   239      61.921  54.292  15.829
ATOM   3677  N   ARG   240      61.595  52.443  14.581
ATOM   3678  H   ARG   240      61.994  51.846  13.871
ATOM   3679  CA  ARG   240      60.476  51.882  15.314
ATOM   3680  HA  ARG   240      59.807  52.691  15.609
ATOM   3681  CB  ARG   240      59.746  50.937  14.433
ATOM   3682  HB2 ARG   240      60.377  50.330  13.784
ATOM   3683  HB3 ARG   240      59.100  50.355  15.091
ATOM   3684  CG  ARG   240      58.711  51.618  13.475
ATOM   3685  HG2 ARG   240      57.983  52.279  13.946
ATOM   3686  HG3 ARG   240      59.203  52.298  12.780
ATOM   3687  CD  ARG   240      57.936  50.497  12.765
ATOM   3688  HD2 ARG   240      57.664  49.739  13.499
ATOM   3689  HD3 ARG   240      56.962  50.823  12.398
ATOM   3690  NE  ARG   240      58.640  49.744  11.695
ATOM   3691  HE  ARG   240      59.197  50.298  11.059
ATOM   3692  CZ  ARG   240      58.461  48.476  11.275
ATOM   3693  NH1 ARG   240      57.761  47.546  11.923
ATOM   3694 HH11 ARG   240      57.177  47.807  12.704
ATOM   3695 HH12 ARG   240      57.617  46.647  11.487
ATOM   3696  NH2 ARG   240      58.935  48.102  10.101
ATOM   3697 HH21 ARG   240      59.292  48.831   9.501
ATOM   3698 HH22 ARG   240      58.838  47.188   9.680
ATOM   3699  C   ARG   240      61.011  51.132  16.593
ATOM   3700  O   ARG   240      60.351  51.202  17.602
ATOM   3701  N   MET   241      62.229  50.564  16.555
ATOM   3702  H   MET   241      62.728  50.597  15.678
ATOM   3703  CA  MET   241      62.861  49.957  17.736
ATOM   3704  HA  MET   241      62.076  49.410  18.259
ATOM   3705  CB  MET   241      64.019  49.018  17.365
ATOM   3706  HB2 MET   241      63.689  48.410  16.523
ATOM   3707  HB3 MET   241      64.869  49.609  17.021
ATOM   3708  CG  MET   241      64.400  48.171  18.574
ATOM   3709  HG2 MET   241      64.266  48.751  19.486
ATOM   3710  HG3 MET   241      63.645  47.386  18.592
ATOM   3711  SD  MET   241      66.083  47.423  18.463
ATOM   3712  CE  MET   241      65.716  46.368  17.151
ATOM   3713  HE1 MET   241      66.521  45.634  17.144
ATOM   3714  HE2 MET   241      64.781  45.832  17.321
ATOM   3715  HE3 MET   241      65.631  46.923  16.216
ATOM   3716  C   MET   241      63.243  51.098  18.649
ATOM   3717  O   MET   241      62.831  51.275  19.821
ATOM   3718  N   CYS   242      64.057  52.060  18.067
ATOM   3719  H   CYS   242      64.370  51.915  17.117
ATOM   3720  CA  CYS   242      64.539  53.266  18.729
ATOM   3721  HA  CYS   242      65.408  53.061  19.352
ATOM   3722  CB  CYS   242      65.052  54.133  17.613
ATOM   3723  HB2 CYS   242      64.501  54.084  16.674
ATOM   3724  HB3 CYS   242      65.008  55.147  18.011
ATOM   3725  SG  CYS   242      66.760  53.786  17.094
ATOM   3726  HG  CYS   242      66.452  52.651  16.462
ATOM   3727  C   CYS   242      63.547  54.098  19.581
ATOM   3728  O   CYS   242      63.924  54.589  20.626
ATOM   3729  N   GLY   243      62.285  54.314  19.112
ATOM   3730  H   GLY   243      62.083  54.031  18.165
ATOM   3731  CA  GLY   243      61.318  54.992  19.859
ATOM   3732  HA2 GLY   243      61.700  56.005  19.982
ATOM   3733  HA3 GLY   243      60.328  54.989  19.403
ATOM   3734  C   GLY   243      61.070  54.382  21.246
ATOM   3735  O   GLY   243      61.271  55.080  22.227
ATOM   3736  N   LEU   244      60.697  53.096  21.282
ATOM   3737  H   LEU   244      60.785  52.549  20.437
ATOM   3738  CA  LEU   244      60.538  52.362  22.523
ATOM   3739  HA  LEU   244      59.860  52.946  23.146
ATOM   3740  CB  LEU   244      60.051  51.001  22.317
ATOM   3741  HB2 LEU   244      59.043  51.072  21.909
ATOM   3742  HB3 LEU   244      60.653  50.583  21.511
ATOM   3743  CG  LEU   244      60.029  50.116  23.494
ATOM   3744  HG  LEU   244      61.019  49.859  23.872
ATOM   3745  CD1 LEU   244      59.226  50.617  24.677
ATOM   3746 HD11 LEU   244      58.154  50.566  24.490
ATOM   3747 HD12 LEU   244      59.427  49.944  25.510
ATOM   3748 HD13 LEU   244      59.566  51.629  24.899
ATOM   3749  CD2 LEU   244      59.312  48.804  23.173
ATOM   3750 HD21 LEU   244      59.297  48.131  24.029
ATOM   3751 HD22 LEU   244      58.284  48.961  22.845
ATOM   3752 HD23 LEU   244      59.910  48.333  22.393
ATOM   3753  C   LEU   244      61.866  52.406  23.272
ATOM   3754  O   LEU   244      61.948  52.776  24.439
ATOM   3755  N   LEU   245      63.032  52.044  22.723
ATOM   3756  H   LEU   245      63.137  51.591  21.827
ATOM   3757  CA  LEU   245      64.259  52.104  23.436
ATOM   3758  HA  LEU   245      64.318  51.301  24.169
ATOM   3759  CB  LEU   245      65.374  51.834  22.418
ATOM   3760  HB2 LEU   245      65.181  52.427  21.522
ATOM   3761  HB3 LEU   245      66.349  52.209  22.727
ATOM   3762  CG  LEU   245      65.601  50.384  21.876
ATOM   3763  HG  LEU   245      64.835  50.041  21.181
ATOM   3764  CD1 LEU   245      66.931  50.375  21.064
ATOM   3765 HD11 LEU   245      67.694  50.809  21.711
ATOM   3766 HD12 LEU   245      67.124  49.349  20.750
ATOM   3767 HD13 LEU   245      66.750  51.092  20.262
ATOM   3768  CD2 LEU   245      65.606  49.330  23.036
ATOM   3769 HD21 LEU   245      65.741  48.322  22.643
ATOM   3770 HD22 LEU   245      66.391  49.668  23.713
ATOM   3771 HD23 LEU   245      64.727  49.367  23.679
ATOM   3772  C   LEU   245      64.614  53.429  24.169
ATOM   3773  O   LEU   245      65.359  53.415  25.173
ATOM   3774  N   LEU   246      64.254  54.541  23.486
ATOM   3775  H   LEU   246      63.818  54.399  22.587
ATOM   3776  CA  LEU   246      64.465  55.924  23.990
ATOM   3777  HA  LEU   246      65.408  56.002  24.530
ATOM   3778  CB  LEU   246      64.380  56.910  22.844
ATOM   3779  HB2 LEU   246      63.537  56.601  22.225
ATOM   3780  HB3 LEU   246      64.101  57.893  23.220
ATOM   3781  CG  LEU   246      65.588  56.941  21.896
ATOM   3782  HG  LEU   246      65.652  55.962  21.422
ATOM   3783  CD1 LEU   246      65.366  58.001  20.738
ATOM   3784 HD11 LEU   246      65.250  58.999  21.160
ATOM   3785 HD12 LEU   246      66.290  57.901  20.168
ATOM   3786 HD13 LEU   246      64.496  57.760  20.128
ATOM   3787  CD2 LEU   246      66.927  57.208  22.637
ATOM   3788 HD21 LEU   246      67.103  56.435  23.386
ATOM   3789 HD22 LEU   246      67.831  57.471  22.089
ATOM   3790 HD23 LEU   246      66.773  58.093  23.253
ATOM   3791  C   LEU   246      63.380  56.252  24.987
ATOM   3792  O   LEU   246      63.574  57.045  25.916
ATOM   3793  N   VAL   247      62.168  55.838  24.848
ATOM   3794  H   VAL   247      61.792  55.274  24.099
ATOM   3795  CA  VAL   247      61.273  55.855  26.006
ATOM   3796  HA  VAL   247      61.043  56.831  26.433
ATOM   3797  CB  VAL   247      59.882  55.472  25.406
ATOM   3798  HB  VAL   247      60.050  54.615  24.752
ATOM   3799  CG1 VAL   247      58.935  54.839  26.383
ATOM   3800 HG11 VAL   247      59.395  53.916  26.735
ATOM   3801 HG12 VAL   247      58.725  55.513  27.213
ATOM   3802 HG13 VAL   247      58.037  54.511  25.858
ATOM   3803  CG2 VAL   247      59.211  56.726  24.820
ATOM   3804 HG21 VAL   247      59.763  57.038  23.933
ATOM   3805 HG22 VAL   247      58.219  56.417  24.491
ATOM   3806 HG23 VAL   247      59.018  57.504  25.558
ATOM   3807  C   VAL   247      61.681  54.994  27.199
ATOM   3808  O   VAL   247      61.215  55.266  28.338
ATOM   3809  N   GLY   248      62.535  53.962  27.035
ATOM   3810  H   GLY   248      62.862  53.774  26.098
ATOM   3811  CA  GLY   248      63.265  53.366  28.162
ATOM   3812  HA2 GLY   248      62.653  53.143  29.037
ATOM   3813  HA3 GLY   248      63.743  52.452  27.810
ATOM   3814  C   GLY   248      64.269  54.313  28.638
ATOM   3815  O   GLY   248      64.037  54.995  29.664
ATOM   3816  N   GLY   249      65.445  54.341  27.944
ATOM   3817  H   GLY   249      65.501  53.767  27.114
ATOM   3818  CA  GLY   249      66.571  55.125  28.518
ATOM   3819  HA2 GLY   249      66.629  54.619  29.482
ATOM   3820  HA3 GLY   249      67.479  54.940  27.945
ATOM   3821  C   GLY   249      66.383  56.566  28.792
ATOM   3822  O   GLY   249      67.219  57.158  29.587
ATOM   3823  N   LEU   250      65.338  57.141  28.187
ATOM   3824  H   LEU   250      64.651  56.559  27.728
ATOM   3825  CA  LEU   250      65.046  58.598  28.449
ATOM   3826  HA  LEU   250      65.798  59.047  29.097
ATOM   3827  CB  LEU   250      65.014  59.408  27.145
ATOM   3828  HB2 LEU   250      63.961  59.355  26.868
ATOM   3829  HB3 LEU   250      65.191  60.413  27.527
ATOM   3830  CG  LEU   250      66.021  59.060  25.988
ATOM   3831  HG  LEU   250      65.749  58.114  25.520
ATOM   3832  CD1 LEU   250      65.961  60.177  24.950
ATOM   3833 HD11 LEU   250      64.917  60.444  24.783
ATOM   3834 HD12 LEU   250      66.346  61.095  25.394
ATOM   3835 HD13 LEU   250      66.500  59.910  24.040
ATOM   3836  CD2 LEU   250      67.409  58.875  26.561
ATOM   3837 HD21 LEU   250      67.922  57.973  26.229
ATOM   3838 HD22 LEU   250      68.070  59.672  26.221
ATOM   3839 HD23 LEU   250      67.550  58.960  27.638
ATOM   3840  C   LEU   250      63.761  58.816  29.243
ATOM   3841  O   LEU   250      63.312  59.938  29.327
ATOM   3842  N   ASP   251      63.184  57.765  29.799
ATOM   3843  H   ASP   251      63.489  56.814  29.650
ATOM   3844  CA  ASP   251      62.051  58.009  30.769
ATOM   3845  HA  ASP   251      62.165  58.974  31.262
ATOM   3846  CB  ASP   251      60.707  58.123  30.052
ATOM   3847  HB2 ASP   251      60.803  58.709  29.138
ATOM   3848  HB3 ASP   251      60.279  57.134  29.889
ATOM   3849  CG  ASP   251      59.697  58.885  30.939
ATOM   3850  OD1 ASP   251      58.681  58.375  31.376
ATOM   3851  OD2 ASP   251      60.029  60.048  31.264
ATOM   3852  C   ASP   251      62.054  57.043  31.953
ATOM   3853  O   ASP   251      62.326  57.459  33.056
ATOM   3854  N   THR   252      61.798  55.738  31.850
ATOM   3855  H   THR   252      61.620  55.435  30.903
ATOM   3856  CA  THR   252      61.779  54.751  32.944
ATOM   3857  HA  THR   252      60.842  54.972  33.456
ATOM   3858  CB  THR   252      61.601  53.332  32.488
ATOM   3859  HB  THR   252      61.489  52.704  33.371
ATOM   3860  CG2 THR   252      60.380  53.034  31.531
ATOM   3861 HG21 THR   252      60.249  51.997  31.222
ATOM   3862 HG22 THR   252      59.526  53.380  32.115
ATOM   3863 HG23 THR   252      60.390  53.478  30.535
ATOM   3864  OG1 THR   252      62.761  53.093  31.670
ATOM   3865  HG1 THR   252      62.826  52.140  31.767
ATOM   3866  C   THR   252      62.865  54.929  33.996
ATOM   3867  O   THR   252      62.542  54.803  35.137
ATOM   3868  N   VAL   253      64.114  55.187  33.576
ATOM   3869  H   VAL   253      64.242  55.143  32.576
ATOM   3870  CA  VAL   253      65.297  55.230  34.528
ATOM   3871  HA  VAL   253      65.114  54.565  35.372
ATOM   3872  CB  VAL   253      66.635  54.994  33.853
ATOM   3873  HB  VAL   253      66.661  53.952  33.536
ATOM   3874  CG1 VAL   253      66.872  55.665  32.454
ATOM   3875 HG11 VAL   253      66.044  55.473  31.772
ATOM   3876 HG12 VAL   253      66.845  56.755  32.485
ATOM   3877 HG13 VAL   253      67.780  55.263  32.005
ATOM   3878  CG2 VAL   253      67.825  55.189  34.781
ATOM   3879 HG21 VAL   253      68.695  54.965  34.163
ATOM   3880 HG22 VAL   253      67.823  56.255  35.008
ATOM   3881 HG23 VAL   253      67.709  54.504  35.620
ATOM   3882  C   VAL   253      65.330  56.687  35.146
ATOM   3883  O   VAL   253      65.704  56.849  36.325
ATOM   3884  N   VAL   254      64.914  57.727  34.371
ATOM   3885  H   VAL   254      64.449  57.570  33.487
ATOM   3886  CA  VAL   254      64.932  59.101  34.838
ATOM   3887  HA  VAL   254      65.924  59.347  35.217
ATOM   3888  CB  VAL   254      64.491  60.096  33.667
ATOM   3889  HB  VAL   254      63.558  59.656  33.316
ATOM   3890  CG1 VAL   254      64.173  61.618  33.955
ATOM   3891 HG11 VAL   254      65.049  62.265  33.908
ATOM   3892 HG12 VAL   254      63.518  62.001  33.174
ATOM   3893 HG13 VAL   254      63.781  61.625  34.972
ATOM   3894  CG2 VAL   254      65.543  60.115  32.551
ATOM   3895 HG21 VAL   254      65.664  59.104  32.163
ATOM   3896 HG22 VAL   254      65.050  60.698  31.772
ATOM   3897 HG23 VAL   254      66.537  60.516  32.751
ATOM   3898  C   VAL   254      63.972  59.334  35.982
ATOM   3899  O   VAL   254      64.147  60.168  36.828
ATOM   3900  N   ASN   255      62.831  58.588  35.936
ATOM   3901  H   ASN   255      62.644  57.980  35.152
ATOM   3902  CA  ASN   255      61.856  58.748  36.992
ATOM   3903  HA  ASN   255      61.816  59.808  37.242
ATOM   3904  CB  ASN   255      60.551  58.220  36.446
ATOM   3905  HB2 ASN   255      60.650  57.162  36.201
ATOM   3906  HB3 ASN   255      59.836  58.224  37.268
ATOM   3907  CG  ASN   255      60.007  59.122  35.313
ATOM   3908  OD1 ASN   255      60.320  60.289  35.346
ATOM   3909  ND2 ASN   255      59.256  58.507  34.444
ATOM   3910 HD21 ASN   255      59.077  58.951  33.555
ATOM   3911 HD22 ASN   255      58.819  57.600  34.533
ATOM   3912  C   ASN   255      62.221  57.908  38.258
ATOM   3913  O   ASN   255      62.076  58.468  39.387
ATOM   3914  N   PHE   256      62.764  56.744  38.022
ATOM   3915  H   PHE   256      62.995  56.573  37.054
ATOM   3916  CA  PHE   256      63.217  55.808  39.030
ATOM   3917  HA  PHE   256      62.400  55.570  39.711
ATOM   3918  CB  PHE   256      63.475  54.437  38.287
ATOM   3919  HB2 PHE   256      62.601  54.156  37.699
ATOM   3920  HB3 PHE   256      64.286  54.709  37.610
ATOM   3921  CG  PHE   256      63.746  53.215  39.180
ATOM   3922  CD1 PHE   256      64.872  52.484  38.899
ATOM   3923  HD1 PHE   256      65.458  52.794  38.046
ATOM   3924  CE1 PHE   256      65.300  51.358  39.645
ATOM   3925  HE1 PHE   256      66.072  50.686  39.301
ATOM   3926  CZ  PHE   256      64.514  51.048  40.804
ATOM   3927  HZ  PHE   256      64.771  50.221  41.450
ATOM   3928  CE2 PHE   256      63.340  51.734  41.116
ATOM   3929  HE2 PHE   256      62.652  51.306  41.829
ATOM   3930  CD2 PHE   256      62.945  52.802  40.295
ATOM   3931  HD2 PHE   256      62.048  53.357  40.526
ATOM   3932  C   PHE   256      64.341  56.342  39.914
ATOM   3933  O   PHE   256      64.188  56.074  41.100
ATOM   3934  N   LEU   257      65.320  57.017  39.306
ATOM   3935  H   LEU   257      65.422  57.097  38.305
ATOM   3936  CA  LEU   257      66.312  57.671  40.138
ATOM   3937  HA  LEU   257      66.844  56.897  40.691
ATOM   3938  CB  LEU   257      67.254  58.489  39.287
ATOM   3939  HB2 LEU   257      66.594  59.054  38.629
ATOM   3940  HB3 LEU   257      67.915  59.103  39.899
ATOM   3941  CG  LEU   257      68.203  57.733  38.401
ATOM   3942  HG  LEU   257      67.750  56.850  37.950
ATOM   3943  CD1 LEU   257      68.715  58.673  37.300
ATOM   3944 HD11 LEU   257      69.085  58.123  36.434
ATOM   3945 HD12 LEU   257      67.907  59.336  36.989
ATOM   3946 HD13 LEU   257      69.556  59.280  37.636
ATOM   3947  CD2 LEU   257      69.330  57.261  39.331
ATOM   3948 HD21 LEU   257      69.953  58.124  39.568
ATOM   3949 HD22 LEU   257      68.988  56.755  40.234
ATOM   3950 HD23 LEU   257      69.857  56.480  38.783
ATOM   3951  C   LEU   257      65.662  58.558  41.195
ATOM   3952  O   LEU   257      65.990  58.601  42.391
ATOM   3953  N   SER   258      64.727  59.428  40.827
ATOM   3954  H   SER   258      64.531  59.393  39.837
ATOM   3955  CA  SER   258      64.077  60.527  41.604
ATOM   3956  HA  SER   258      64.875  61.099  42.078
ATOM   3957  CB  SER   258      63.324  61.453  40.649
ATOM   3958  HB2 SER   258      62.513  60.926  40.146
ATOM   3959  HB3 SER   258      62.794  62.249  41.174
ATOM   3960  OG  SER   258      64.267  61.985  39.682
ATOM   3961  HG  SER   258      63.901  62.244  38.833
ATOM   3962  C   SER   258      63.152  60.031  42.740
ATOM   3963  O   SER   258      63.282  60.523  43.872
ATOM   3964  N   PHE   259      62.318  59.019  42.451
ATOM   3965  H   PHE   259      62.024  58.808  41.507
ATOM   3966  CA  PHE   259      61.628  58.331  43.454
ATOM   3967  HA  PHE   259      60.941  58.933  44.049
ATOM   3968  CB  PHE   259      60.750  57.300  42.777
ATOM   3969  HB2 PHE   259      61.394  56.587  42.264
ATOM   3970  HB3 PHE   259      60.184  56.873  43.604
ATOM   3971  CG  PHE   259      59.713  57.806  41.749
ATOM   3972  CD1 PHE   259      58.817  58.879  42.041
ATOM   3973  HD1 PHE   259      58.836  59.339  43.018
ATOM   3974  CE1 PHE   259      57.813  59.120  41.122
ATOM   3975  HE1 PHE   259      57.094  59.855  41.451
ATOM   3976  CZ  PHE   259      57.716  58.471  39.879
ATOM   3977  HZ  PHE   259      56.905  58.714  39.207
ATOM   3978  CE2 PHE   259      58.595  57.421  39.613
ATOM   3979  HE2 PHE   259      58.487  56.729  38.791
ATOM   3980  CD2 PHE   259      59.586  57.070  40.544
ATOM   3981  HD2 PHE   259      60.181  56.170  40.500
ATOM   3982  C   PHE   259      62.640  57.566  44.398
ATOM   3983  O   PHE   259      62.429  57.548  45.615
ATOM   3984  N   SER   260      63.808  57.105  43.859
ATOM   3985  H   SER   260      63.902  57.085  42.854
ATOM   3986  CA  SER   260      64.735  56.463  44.811
ATOM   3987  HA  SER   260      64.148  55.742  45.381
ATOM   3988  CB  SER   260      65.755  55.683  43.876
ATOM   3989  HB2 SER   260      66.450  56.322  43.331
ATOM   3990  HB3 SER   260      66.490  55.150  44.481
ATOM   3991  OG  SER   260      65.166  54.604  43.125
ATOM   3992  HG  SER   260      64.651  54.954  42.393
ATOM   3993  C   SER   260      65.392  57.365  45.857
ATOM   3994  O   SER   260      65.601  56.797  46.962
ATOM   3995  N   MET   261      65.541  58.645  45.497
ATOM   3996  H   MET   261      65.150  58.813  44.581
ATOM   3997  CA  MET   261      66.102  59.660  46.380
ATOM   3998  HA  MET   261      66.825  59.259  47.091
ATOM   3999  CB  MET   261      66.917  60.611  45.505
ATOM   4000  HB2 MET   261      66.137  60.985  44.842
ATOM   4001  HB3 MET   261      67.208  61.484  46.090
ATOM   4002  CG  MET   261      68.047  60.109  44.661
ATOM   4003  HG2 MET   261      67.577  59.470  43.915
ATOM   4004  HG3 MET   261      68.487  60.896  44.046
ATOM   4005  SD  MET   261      69.268  59.157  45.590
ATOM   4006  CE  MET   261      70.238  60.541  46.144
ATOM   4007  HE1 MET   261      69.649  61.295  46.664
ATOM   4008  HE2 MET   261      71.015  60.063  46.741
ATOM   4009  HE3 MET   261      70.613  61.036  45.248
ATOM   4010  C   MET   261      65.064  60.449  47.133
ATOM   4011  O   MET   261      65.402  60.986  48.190
ATOM   4012  N   GLU   262      63.786  60.527  46.614
ATOM   4013  H   GLU   262      63.572  60.182  45.690
ATOM   4014  CA  GLU   262      62.700  61.088  47.414
ATOM   4015  HA  GLU   262      62.957  62.077  47.792
ATOM   4016  CB  GLU   262      61.409  61.127  46.525
ATOM   4017  HB2 GLU   262      61.722  61.725  45.669
ATOM   4018  HB3 GLU   262      61.171  60.113  46.206
ATOM   4019  CG  GLU   262      60.265  61.805  47.128
ATOM   4020  HG2 GLU   262      60.633  62.686  47.653
ATOM   4021  HG3 GLU   262      59.814  62.299  46.267
ATOM   4022  CD  GLU   262      59.311  60.918  47.946
ATOM   4023  OE1 GLU   262      58.377  61.483  48.588
ATOM   4024  OE2 GLU   262      59.443  59.633  47.921
ATOM   4025  C   GLU   262      62.471  60.287  48.669
ATOM   4026  O   GLU   262      62.072  60.816  49.747
ATOM   4027  N   PHE   263      62.648  58.995  48.528
ATOM   4028  H   PHE   263      62.922  58.692  47.604
ATOM   4029  CA  PHE   263      62.703  57.992  49.612
ATOM   4030  HA  PHE   263      61.776  58.122  50.171
ATOM   4031  CB  PHE   263      62.650  56.586  49.015
ATOM   4032  HB2 PHE   263      61.590  56.330  49.039
ATOM   4033  HB3 PHE   263      63.021  56.542  47.991
ATOM   4034  CG  PHE   263      63.389  55.504  49.811
ATOM   4035  CD1 PHE   263      64.335  54.658  49.214
ATOM   4036  HD1 PHE   263      64.702  54.776  48.205
ATOM   4037  CE1 PHE   263      65.093  53.754  49.974
ATOM   4038  HE1 PHE   263      65.918  53.224  49.524
ATOM   4039  CZ  PHE   263      64.900  53.626  51.391
ATOM   4040  HZ  PHE   263      65.529  52.944  51.944
ATOM   4041  CE2 PHE   263      63.871  54.394  51.961
ATOM   4042  HE2 PHE   263      63.630  54.363  53.014
ATOM   4043  CD2 PHE   263      63.102  55.289  51.208
ATOM   4044  HD2 PHE   263      62.253  55.751  51.692
ATOM   4045  C   PHE   263      63.832  58.276  50.555
ATOM   4046  O   PHE   263      63.616  58.595  51.731
ATOM   4047  N   LEU   264      65.044  58.297  50.063
ATOM   4048  H   LEU   264      65.215  58.008  49.110
ATOM   4049  CA  LEU   264      66.301  58.386  50.935
ATOM   4050  HA  LEU   264      66.267  57.614  51.703
ATOM   4051  CB  LEU   264      67.551  58.175  50.007
ATOM   4052  HB2 LEU   264      67.468  58.894  49.192
ATOM   4053  HB3 LEU   264      68.473  58.449  50.522
ATOM   4054  CG  LEU   264      67.744  56.723  49.479
ATOM   4055  HG  LEU   264      66.780  56.497  49.021
ATOM   4056  CD1 LEU   264      68.670  56.742  48.282
ATOM   4057 HD11 LEU   264      68.196  57.217  47.424
ATOM   4058 HD12 LEU   264      69.636  57.148  48.582
ATOM   4059 HD13 LEU   264      68.827  55.696  48.017
ATOM   4060  CD2 LEU   264      67.940  55.667  50.567
ATOM   4061 HD21 LEU   264      68.158  54.732  50.052
ATOM   4062 HD22 LEU   264      68.873  55.841  51.102
ATOM   4063 HD23 LEU   264      67.122  55.690  51.287
ATOM   4064  C   LEU   264      66.366  59.759  51.672
ATOM   4065  O   LEU   264      66.720  59.914  52.812
ATOM   4066  N   ALA   265      66.032  60.892  50.974
ATOM   4067  H   ALA   265      65.614  60.824  50.058
ATOM   4068  CA  ALA   265      65.962  62.240  51.550
ATOM   4069  HA  ALA   265      66.970  62.590  51.773
ATOM   4070  CB  ALA   265      65.263  63.164  50.551
ATOM   4071  HB1 ALA   265      65.765  63.110  49.585
ATOM   4072  HB2 ALA   265      64.257  62.797  50.351
ATOM   4073  HB3 ALA   265      65.087  64.140  51.004
ATOM   4074  C   ALA   265      65.223  62.285  52.923
ATOM   4075  O   ALA   265      65.808  62.917  53.840
ATOM   4076  N   LYS   266      64.057  61.582  53.054
ATOM   4077  H   LYS   266      63.822  60.935  52.314
ATOM   4078  CA  LYS   266      63.270  61.514  54.309
ATOM   4079  HA  LYS   266      63.141  62.462  54.833
ATOM   4080  CB  LYS   266      61.837  61.176  53.833
ATOM   4081  HB2 LYS   266      61.849  60.209  53.331
ATOM   4082  HB3 LYS   266      61.163  61.019  54.676
ATOM   4083  CG  LYS   266      61.249  62.128  52.752
ATOM   4084  HG2 LYS   266      61.489  63.172  52.949
ATOM   4085  HG3 LYS   266      61.682  61.965  51.765
ATOM   4086  CD  LYS   266      59.761  61.877  52.537
ATOM   4087  HD2 LYS   266      59.334  62.202  53.486
ATOM   4088  HD3 LYS   266      59.407  62.552  51.759
ATOM   4089  CE  LYS   266      59.261  60.490  52.188
ATOM   4090  HE2 LYS   266      59.622  59.723  52.875
ATOM   4091  HE3 LYS   266      58.179  60.498  52.324
ATOM   4092  NZ  LYS   266      59.709  60.119  50.857
ATOM   4093  HZ1 LYS   266      59.097  60.659  50.263
ATOM   4094  HZ2 LYS   266      60.655  60.408  50.658
ATOM   4095  HZ3 LYS   266      59.504  59.179  50.547
ATOM   4096  C   LYS   266      63.760  60.397  55.210
ATOM   4097  O   LYS   266      63.063  60.064  56.178
ATOM   4098  N   SER   267      64.784  59.615  54.835
ATOM   4099  H   SER   267      65.248  59.691  53.942
ATOM   4100  CA  SER   267      65.077  58.422  55.582
ATOM   4101  HA  SER   267      64.424  58.268  56.440
ATOM   4102  CB  SER   267      64.952  57.279  54.539
ATOM   4103  HB2 SER   267      65.740  57.261  53.787
ATOM   4104  HB3 SER   267      65.151  56.306  54.987
ATOM   4105  OG  SER   267      63.710  57.174  53.877
ATOM   4106  HG  SER   267      63.711  57.665  53.053
ATOM   4107  C   SER   267      66.562  58.468  56.007
ATOM   4108  O   SER   267      67.399  57.975  55.194
ATOM   4109  N   PRO   268      66.914  58.917  57.204
ATOM   4110  CD  PRO   268      66.008  59.391  58.212
ATOM   4111  HD2 PRO   268      65.328  58.640  58.615
ATOM   4112  HD3 PRO   268      65.259  60.075  57.813
ATOM   4113  CG  PRO   268      66.840  60.194  59.210
ATOM   4114  HG2 PRO   268      66.805  59.832  60.237
ATOM   4115  HG3 PRO   268      66.599  61.257  59.194
ATOM   4116  CB  PRO   268      68.310  60.094  58.647
ATOM   4117  HB2 PRO   268      69.152  60.020  59.335
ATOM   4118  HB3 PRO   268      68.514  61.010  58.093
ATOM   4119  CA  PRO   268      68.310  59.024  57.545
ATOM   4120  HA  PRO   268      68.826  59.426  56.674
ATOM   4121  C   PRO   268      68.911  57.732  58.053
ATOM   4122  O   PRO   268      70.105  57.677  58.210
ATOM   4123  N   GLU   269      68.138  56.646  58.230
ATOM   4124  H   GLU   269      67.160  56.680  57.979
ATOM   4125  CA  GLU   269      68.596  55.338  58.616
ATOM   4126  HA  GLU   269      69.410  55.461  59.330
ATOM   4127  CB  GLU   269      67.522  54.497  59.332
ATOM   4128  HB2 GLU   269      66.696  54.489  58.621
ATOM   4129  HB3 GLU   269      67.783  53.446  59.455
ATOM   4130  CG  GLU   269      67.104  55.122  60.627
ATOM   4131  HG2 GLU   269      67.929  54.966  61.322
ATOM   4132  HG3 GLU   269      66.845  56.169  60.464
ATOM   4133  CD  GLU   269      65.955  54.493  61.423
ATOM   4134  OE1 GLU   269      66.232  54.082  62.554
ATOM   4135  OE2 GLU   269      64.768  54.527  60.949
ATOM   4136  C   GLU   269      69.123  54.635  57.364
ATOM   4137  O   GLU   269      70.287  54.238  57.326
ATOM   4138  N   HIE   270      68.313  54.588  56.303
ATOM   4139  H   HIE   270      67.361  54.896  56.440
ATOM   4140  CA  HIE   270      68.693  53.949  55.090
ATOM   4141  HA  HIE   270      68.949  52.916  55.322
ATOM   4142  CB  HIE   270      67.520  53.827  54.110
ATOM   4143  HB2 HIE   270      67.122  54.839  54.036
ATOM   4144  HB3 HIE   270      67.863  53.716  53.081
ATOM   4145  CG  HIE   270      66.377  52.951  54.444
ATOM   4146  ND1 HIE   270      65.136  53.406  54.953
ATOM   4147  CE1 HIE   270      64.427  52.344  55.221
ATOM   4148  HE1 HIE   270      63.505  52.374  55.784
ATOM   4149  NE2 HIE   270      65.037  51.247  54.843
ATOM   4150  HE2 HIE   270      64.654  50.320  54.951
ATOM   4151  CD2 HIE   270      66.232  51.588  54.314
ATOM   4152  HD2 HIE   270      66.983  50.975  53.838
ATOM   4153  C   HIE   270      69.902  54.573  54.435
ATOM   4154  O   HIE   270      70.721  53.832  53.860
ATOM   4155  N   ARG   271      70.118  55.882  54.531
ATOM   4156  H   ARG   271      69.308  56.458  54.713
ATOM   4157  CA  ARG   271      71.322  56.479  53.927
ATOM   4158  HA  ARG   271      71.384  56.032  52.935
ATOM   4159  CB  ARG   271      71.232  58.014  54.067
ATOM   4160  HB2 ARG   271      70.876  58.276  55.064
ATOM   4161  HB3 ARG   271      72.185  58.406  53.713
ATOM   4162  CG  ARG   271      70.154  58.690  53.168
ATOM   4163  HG2 ARG   271      70.206  58.490  52.099
ATOM   4164  HG3 ARG   271      69.162  58.452  53.552
ATOM   4165  CD  ARG   271      70.265  60.244  53.155
ATOM   4166  HD2 ARG   271      71.043  60.508  52.439
ATOM   4167  HD3 ARG   271      69.403  60.547  52.560
ATOM   4168  NE  ARG   271      70.325  60.969  54.421
ATOM   4169  HE  ARG   271      71.262  61.027  54.793
ATOM   4170  CZ  ARG   271      69.294  61.635  54.944
ATOM   4171  NH1 ARG   271      68.087  61.573  54.456
ATOM   4172 HH11 ARG   271      67.754  60.829  53.860
ATOM   4173 HH12 ARG   271      67.408  62.259  54.749
ATOM   4174  NH2 ARG   271      69.424  62.483  55.939
ATOM   4175 HH21 ARG   271      70.295  62.577  56.443
ATOM   4176 HH22 ARG   271      68.625  62.943  56.350
ATOM   4177  C   ARG   271      72.651  55.907  54.644
ATOM   4178  O   ARG   271      73.604  55.608  53.944
ATOM   4179  N   GLN   272      72.540  55.549  55.956
ATOM   4180  H   GLN   272      71.663  55.525  56.455
ATOM   4181  CA  GLN   272      73.665  54.880  56.675
ATOM   4182  HA  GLN   272      74.601  55.433  56.609
ATOM   4183  CB  GLN   272      73.379  54.748  58.189
ATOM   4184  HB2 GLN   272      73.004  55.714  58.524
ATOM   4185  HB3 GLN   272      72.551  54.042  58.256
ATOM   4186  CG  GLN   272      74.508  54.283  59.121
ATOM   4187  HG2 GLN   272      74.133  54.315  60.144
ATOM   4188  HG3 GLN   272      74.761  53.238  58.949
ATOM   4189  CD  GLN   272      75.811  55.147  59.189
ATOM   4190  OE1 GLN   272      75.809  56.367  59.022
ATOM   4191  NE2 GLN   272      76.950  54.567  59.283
ATOM   4192 HE21 GLN   272      77.806  55.084  59.429
ATOM   4193 HE22 GLN   272      76.895  53.588  59.519
ATOM   4194  C   GLN   272      73.800  53.439  56.085
ATOM   4195  O   GLN   272      74.875  53.044  55.608
ATOM   4196  N   GLU   273      72.690  52.674  55.977
ATOM   4197  H   GLU   273      71.833  53.101  56.298
ATOM   4198  CA  GLU   273      72.587  51.351  55.410
ATOM   4199  HA  GLU   273      73.056  50.594  56.039
ATOM   4200  CB  GLU   273      71.083  50.926  55.101
ATOM   4201  HB2 GLU   273      70.535  51.670  54.523
ATOM   4202  HB3 GLU   273      71.067  49.959  54.599
ATOM   4203  CG  GLU   273      70.309  50.866  56.437
ATOM   4204  HG2 GLU   273      70.574  51.658  57.138
ATOM   4205  HG3 GLU   273      69.227  50.906  56.311
ATOM   4206  CD  GLU   273      70.443  49.428  57.024
ATOM   4207  OE1 GLU   273      70.836  49.388  58.205
ATOM   4208  OE2 GLU   273      70.104  48.406  56.437
ATOM   4209  C   GLU   273      73.305  51.308  54.115
ATOM   4210  O   GLU   273      73.936  50.290  53.836
ATOM   4211  N   LEU   274      73.189  52.298  53.183
ATOM   4212  H   LEU   274      72.413  52.916  53.373
ATOM   4213  CA  LEU   274      73.899  52.242  51.862
ATOM   4214  HA  LEU   274      73.734  51.248  51.447
ATOM   4215  CB  LEU   274      73.382  53.254  50.772
ATOM   4216  HB2 LEU   274      73.529  54.249  51.192
ATOM   4217  HB3 LEU   274      73.939  53.214  49.836
ATOM   4218  CG  LEU   274      71.913  53.101  50.443
ATOM   4219  HG  LEU   274      71.290  53.128  51.336
ATOM   4220  CD1 LEU   274      71.338  54.366  49.793
ATOM   4221 HD11 LEU   274      71.343  55.238  50.446
ATOM   4222 HD12 LEU   274      71.932  54.588  48.906
ATOM   4223 HD13 LEU   274      70.259  54.240  49.692
ATOM   4224  CD2 LEU   274      71.634  51.888  49.503
ATOM   4225 HD21 LEU   274      72.250  51.910  48.604
ATOM   4226 HD22 LEU   274      71.681  50.945  50.049
ATOM   4227 HD23 LEU   274      70.592  51.966  49.196
ATOM   4228  C   LEU   274      75.408  52.491  51.936
ATOM   4229  O   LEU   274      76.047  52.021  51.019
ATOM   4230  N   ILE   275      75.920  53.066  52.972
ATOM   4231  H   ILE   275      75.211  53.439  53.587
ATOM   4232  CA  ILE   275      77.303  53.269  53.266
ATOM   4233  HA  ILE   275      77.900  53.032  52.386
ATOM   4234  CB  ILE   275      77.640  54.771  53.648
ATOM   4235  HB  ILE   275      78.714  54.933  53.739
ATOM   4236  CG2 ILE   275      77.135  55.717  52.467
ATOM   4237 HG21 ILE   275      77.601  56.695  52.582
ATOM   4238 HG22 ILE   275      77.459  55.496  51.450
ATOM   4239 HG23 ILE   275      76.045  55.728  52.456
ATOM   4240  CG1 ILE   275      77.051  55.256  55.034
ATOM   4241 HG12 ILE   275      75.961  55.279  55.048
ATOM   4242 HG13 ILE   275      77.408  54.604  55.830
ATOM   4243  CD1 ILE   275      77.596  56.600  55.483
ATOM   4244 HD11 ILE   275      77.284  57.366  54.774
ATOM   4245 HD12 ILE   275      77.194  56.796  56.477
ATOM   4246 HD13 ILE   275      78.677  56.564  55.622
ATOM   4247  C   ILE   275      77.935  52.276  54.314
ATOM   4248  O   ILE   275      79.120  51.978  54.204
ATOM   4249  N   GLU   276      77.102  51.612  55.147
ATOM   4250  H   GLU   276      76.173  51.899  55.417
ATOM   4251  CA  GLU   276      77.679  50.445  55.842
ATOM   4252  HA  GLU   276      78.588  50.805  56.324
ATOM   4253  CB  GLU   276      76.812  50.024  57.033
ATOM   4254  HB2 GLU   276      75.780  50.009  56.683
ATOM   4255  HB3 GLU   276      77.133  49.066  57.438
ATOM   4256  CG  GLU   276      76.803  51.064  58.168
ATOM   4257  HG2 GLU   276      77.785  51.163  58.629
ATOM   4258  HG3 GLU   276      76.524  52.077  57.877
ATOM   4259  CD  GLU   276      75.913  50.615  59.368
ATOM   4260  OE1 GLU   276      76.045  51.263  60.474
ATOM   4261  OE2 GLU   276      75.131  49.626  59.341
ATOM   4262  C   GLU   276      77.936  49.284  54.959
ATOM   4263  O   GLU   276      78.916  48.627  55.124
ATOM   4264  N   ARG   277      77.054  48.987  53.977
ATOM   4265  H   ARG   277      76.223  49.556  53.903
ATOM   4266  CA  ARG   277      77.199  47.894  53.045
ATOM   4267  HA  ARG   277      78.256  47.644  53.136
ATOM   4268  CB  ARG   277      76.371  46.675  53.442
ATOM   4269  HB2 ARG   277      75.343  46.935  53.192
ATOM   4270  HB3 ARG   277      76.691  45.870  52.781
ATOM   4271  CG  ARG   277      76.532  46.115  54.827
ATOM   4272  HG2 ARG   277      76.371  46.929  55.534
ATOM   4273  HG3 ARG   277      75.772  45.355  55.007
ATOM   4274  CD  ARG   277      77.889  45.470  55.142
ATOM   4275  HD2 ARG   277      78.016  44.524  54.615
ATOM   4276  HD3 ARG   277      78.646  46.181  54.814
ATOM   4277  NE  ARG   277      77.991  45.159  56.593
ATOM   4278  HE  ARG   277      77.508  44.321  56.883
ATOM   4279  CZ  ARG   277      78.738  45.768  57.525
ATOM   4280  NH1 ARG   277      79.189  46.939  57.288
ATOM   4281 HH11 ARG   277      79.146  47.426  56.404
ATOM   4282 HH12 ARG   277      79.449  47.481  58.099
ATOM   4283  NH2 ARG   277      78.788  45.321  58.746
ATOM   4284 HH21 ARG   277      78.368  44.435  58.988
ATOM   4285 HH22 ARG   277      79.303  45.931  59.365
ATOM   4286  C   ARG   277      76.995  48.237  51.520
ATOM   4287  O   ARG   277      76.062  47.716  50.954
ATOM   4288  N   PRO   278      77.876  49.098  50.938
ATOM   4289  CD  PRO   278      78.890  49.852  51.519
ATOM   4290  HD2 PRO   278      79.774  49.269  51.780
ATOM   4291  HD3 PRO   278      78.600  50.436  52.394
ATOM   4292  CG  PRO   278      79.328  50.865  50.483
ATOM   4293  HG2 PRO   278      80.346  51.192  50.695
ATOM   4294  HG3 PRO   278      78.586  51.657  50.586
ATOM   4295  CB  PRO   278      79.221  50.084  49.187
ATOM   4296  HB2 PRO   278      80.033  49.393  48.963
ATOM   4297  HB3 PRO   278      79.124  50.736  48.318
ATOM   4298  CA  PRO   278      77.881  49.364  49.464
ATOM   4299  HA  PRO   278      76.959  49.935  49.353
ATOM   4300  C   PRO   278      77.762  48.112  48.566
ATOM   4301  O   PRO   278      77.164  48.174  47.483
ATOM   4302  N   GLU   279      78.338  46.953  48.965
ATOM   4303  H   GLU   279      79.057  47.008  49.671
ATOM   4304  CA  GLU   279      78.229  45.624  48.330
ATOM   4305  HA  GLU   279      78.723  45.801  47.375
ATOM   4306  CB  GLU   279      79.018  44.640  49.199
ATOM   4307  HB2 GLU   279      80.007  45.095  49.253
ATOM   4308  HB3 GLU   279      78.479  44.611  50.146
ATOM   4309  CG  GLU   279      78.967  43.283  48.575
ATOM   4310  HG2 GLU   279      77.971  42.864  48.721
ATOM   4311  HG3 GLU   279      79.051  43.350  47.491
ATOM   4312  CD  GLU   279      80.012  42.290  49.016
ATOM   4313  OE1 GLU   279      80.822  41.855  48.156
ATOM   4314  OE2 GLU   279      80.109  41.939  50.232
ATOM   4315  C   GLU   279      76.827  45.173  48.179
ATOM   4316  O   GLU   279      76.445  44.818  47.046
ATOM   4317  N   ARG   280      75.979  45.219  49.269
ATOM   4318  H   ARG   280      76.384  45.520  50.144
ATOM   4319  CA  ARG   280      74.618  44.751  49.292
ATOM   4320  HA  ARG   280      74.700  43.739  48.894
ATOM   4321  CB  ARG   280      74.065  44.932  50.739
ATOM   4322  HB2 ARG   280      74.753  44.406  51.400
ATOM   4323  HB3 ARG   280      74.088  45.976  51.051
ATOM   4324  CG  ARG   280      72.637  44.329  50.919
ATOM   4325  HG2 ARG   280      71.913  44.920  50.358
ATOM   4326  HG3 ARG   280      72.697  43.301  50.562
ATOM   4327  CD  ARG   280      72.189  44.382  52.344
ATOM   4328  HD2 ARG   280      72.174  45.406  52.718
ATOM   4329  HD3 ARG   280      71.184  43.959  52.336
ATOM   4330  NE  ARG   280      73.020  43.512  53.207
ATOM   4331  HE  ARG   280      73.346  42.676  52.743
ATOM   4332  CZ  ARG   280      73.629  43.773  54.337
ATOM   4333  NH1 ARG   280      73.256  44.717  55.152
ATOM   4334 HH11 ARG   280      72.553  45.399  54.908
ATOM   4335 HH12 ARG   280      73.609  44.805  56.094
ATOM   4336  NH2 ARG   280      74.706  43.140  54.723
ATOM   4337 HH21 ARG   280      75.198  42.717  53.949
ATOM   4338 HH22 ARG   280      75.004  43.282  55.678
ATOM   4339  C   ARG   280      73.682  45.522  48.351
ATOM   4340  O   ARG   280      72.593  45.060  48.070
ATOM   4341  N   ILE   281      74.107  46.628  47.773
ATOM   4342  H   ILE   281      75.040  46.954  47.982
ATOM   4343  CA  ILE   281      73.268  47.546  46.987
ATOM   4344  HA  ILE   281      72.677  48.067  47.741
ATOM   4345  CB  ILE   281      74.037  48.725  46.280
ATOM   4346  HB  ILE   281      74.913  48.412  45.711
ATOM   4347  CG2 ILE   281      73.120  49.373  45.248
ATOM   4348 HG21 ILE   281      73.723  50.153  44.784
ATOM   4349 HG22 ILE   281      73.065  48.670  44.417
ATOM   4350 HG23 ILE   281      72.122  49.578  45.637
ATOM   4351  CG1 ILE   281      74.340  49.679  47.483
ATOM   4352 HG12 ILE   281      73.441  50.006  48.006
ATOM   4353 HG13 ILE   281      74.876  49.172  48.285
ATOM   4354  CD1 ILE   281      75.150  50.969  47.207
ATOM   4355 HD11 ILE   281      75.158  51.618  48.082
ATOM   4356 HD12 ILE   281      76.163  50.691  46.914
ATOM   4357 HD13 ILE   281      74.710  51.618  46.451
ATOM   4358  C   ILE   281      72.304  46.813  45.888
ATOM   4359  O   ILE   281      71.166  47.261  45.835
ATOM   4360  N   PRO   282      72.747  45.734  45.219
ATOM   4361  CD  PRO   282      74.144  45.211  44.999
ATOM   4362  HD2 PRO   282      74.510  44.665  45.868
ATOM   4363  HD3 PRO   282      74.836  46.015  44.749
ATOM   4364  CG  PRO   282      74.163  44.303  43.733
ATOM   4365  HG2 PRO   282      74.889  43.491  43.723
ATOM   4366  HG3 PRO   282      74.303  44.966  42.880
ATOM   4367  CB  PRO   282      72.729  43.804  43.849
ATOM   4368  HB2 PRO   282      72.635  43.021  44.604
ATOM   4369  HB3 PRO   282      72.423  43.447  42.866
ATOM   4370  CA  PRO   282      71.866  44.970  44.335
ATOM   4371  HA  PRO   282      71.640  45.637  43.504
ATOM   4372  C   PRO   282      70.589  44.482  44.996
ATOM   4373  O   PRO   282      69.537  44.571  44.364
ATOM   4374  N   ALA   283      70.619  44.140  46.310
ATOM   4375  H   ALA   283      71.493  44.346  46.772
ATOM   4376  CA  ALA   283      69.390  43.873  47.085
ATOM   4377  HA  ALA   283      68.877  43.140  46.463
ATOM   4378  CB  ALA   283      69.784  43.052  48.311
ATOM   4379  HB1 ALA   283      70.570  43.543  48.884
ATOM   4380  HB2 ALA   283      68.926  42.708  48.888
ATOM   4381  HB3 ALA   283      70.277  42.112  48.065
ATOM   4382  C   ALA   283      68.447  45.013  47.295
ATOM   4383  O   ALA   283      67.276  44.917  46.951
ATOM   4384  N   ALA   284      68.980  46.021  47.909
ATOM   4385  H   ALA   284      69.961  45.945  48.138
ATOM   4386  CA  ALA   284      68.342  47.336  48.022
ATOM   4387  HA  ALA   284      67.486  47.333  48.696
ATOM   4388  CB  ALA   284      69.364  48.323  48.547
ATOM   4389  HB1 ALA   284      68.912  49.229  48.950
ATOM   4390  HB2 ALA   284      69.898  47.816  49.350
ATOM   4391  HB3 ALA   284      70.082  48.592  47.771
ATOM   4392  C   ALA   284      67.742  47.787  46.699
ATOM   4393  O   ALA   284      66.569  48.029  46.603
ATOM   4394  N   CYS   285      68.527  47.781  45.582
ATOM   4395  H   CYS   285      69.494  47.548  45.756
ATOM   4396  CA  CYS   285      68.094  48.233  44.219
ATOM   4397  HA  CYS   285      67.687  49.239  44.320
ATOM   4398  CB  CYS   285      69.243  48.197  43.198
ATOM   4399  HB2 CYS   285      70.092  48.818  43.484
ATOM   4400  HB3 CYS   285      69.604  47.176  43.067
ATOM   4401  SG  CYS   285      68.686  48.691  41.575
ATOM   4402  HG  CYS   285      69.882  48.585  40.990
ATOM   4403  C   CYS   285      66.841  47.486  43.790
ATOM   4404  O   CYS   285      65.846  48.122  43.436
ATOM   4405  N   GLU   286      66.861  46.156  43.891
ATOM   4406  H   GLU   286      67.740  45.661  43.931
ATOM   4407  CA  GLU   286      65.714  45.299  43.588
ATOM   4408  HA  GLU   286      65.285  45.610  42.635
ATOM   4409  CB  GLU   286      66.172  43.813  43.527
ATOM   4410  HB2 GLU   286      66.966  43.679  42.792
ATOM   4411  HB3 GLU   286      66.425  43.480  44.534
ATOM   4412  CG  GLU   286      65.084  42.983  42.905
ATOM   4413  HG2 GLU   286      64.230  43.136  43.565
ATOM   4414  HG3 GLU   286      64.823  43.318  41.901
ATOM   4415  CD  GLU   286      65.452  41.529  42.987
ATOM   4416  OE1 GLU   286      66.277  41.002  42.247
ATOM   4417  OE2 GLU   286      64.714  40.840  43.714
ATOM   4418  C   GLU   286      64.555  45.476  44.629
ATOM   4419  O   GLU   286      63.378  45.413  44.288
ATOM   4420  N   GLU   287      64.846  45.785  45.901
ATOM   4421  H   GLU   287      65.818  45.858  46.167
ATOM   4422  CA  GLU   287      63.858  46.212  46.867
ATOM   4423  HA  GLU   287      63.034  45.500  46.923
ATOM   4424  CB  GLU   287      64.427  46.298  48.326
ATOM   4425  HB2 GLU   287      64.887  45.334  48.542
ATOM   4426  HB3 GLU   287      65.267  46.973  48.491
ATOM   4427  CG  GLU   287      63.468  46.645  49.459
ATOM   4428  HG2 GLU   287      64.058  46.613  50.375
ATOM   4429  HG3 GLU   287      63.022  47.626  49.298
ATOM   4430  CD  GLU   287      62.357  45.635  49.616
ATOM   4431  OE1 GLU   287      62.606  44.372  49.756
ATOM   4432  OE2 GLU   287      61.146  46.023  49.761
ATOM   4433  C   GLU   287      63.239  47.595  46.419
ATOM   4434  O   GLU   287      62.060  47.862  46.599
ATOM   4435  N   LEU   288      63.975  48.548  45.890
ATOM   4436  H   LEU   288      64.943  48.379  45.655
ATOM   4437  CA  LEU   288      63.445  49.859  45.506
ATOM   4438  HA  LEU   288      62.853  50.291  46.313
ATOM   4439  CB  LEU   288      64.577  50.851  45.118
ATOM   4440  HB2 LEU   288      65.127  50.552  44.227
ATOM   4441  HB3 LEU   288      64.086  51.791  44.870
ATOM   4442  CG  LEU   288      65.581  51.119  46.236
ATOM   4443  HG  LEU   288      66.499  50.568  46.035
ATOM   4444  CD1 LEU   288      66.179  52.568  46.194
ATOM   4445 HD11 LEU   288      65.364  53.286  46.286
ATOM   4446 HD12 LEU   288      67.018  52.749  46.865
ATOM   4447 HD13 LEU   288      66.642  52.692  45.215
ATOM   4448  CD2 LEU   288      65.134  50.901  47.728
ATOM   4449 HD21 LEU   288      66.043  51.044  48.314
ATOM   4450 HD22 LEU   288      64.369  51.655  47.915
ATOM   4451 HD23 LEU   288      64.692  49.946  48.012
ATOM   4452  C   LEU   288      62.609  49.618  44.273
ATOM   4453  O   LEU   288      61.518  50.183  44.155
ATOM   4454  N   LEU   289      63.078  48.777  43.238
ATOM   4455  H   LEU   289      64.013  48.403  43.308
ATOM   4456  CA  LEU   289      62.322  48.348  42.053
ATOM   4457  HA  LEU   289      62.062  49.154  41.367
ATOM   4458  CB  LEU   289      63.109  47.290  41.295
ATOM   4459  HB2 LEU   289      64.099  47.708  41.114
ATOM   4460  HB3 LEU   289      63.248  46.419  41.936
ATOM   4461  CG  LEU   289      62.577  46.778  39.919
ATOM   4462  HG  LEU   289      61.563  46.425  40.106
ATOM   4463  CD1 LEU   289      62.658  47.857  38.888
ATOM   4464 HD11 LEU   289      61.826  48.548  39.016
ATOM   4465 HD12 LEU   289      63.652  48.304  38.920
ATOM   4466 HD13 LEU   289      62.358  47.387  37.952
ATOM   4467  CD2 LEU   289      63.474  45.622  39.538
ATOM   4468 HD21 LEU   289      63.105  45.213  38.598
ATOM   4469 HD22 LEU   289      64.487  46.023  39.523
ATOM   4470 HD23 LEU   289      63.518  44.909  40.362
ATOM   4471  C   LEU   289      61.000  47.832  42.556
ATOM   4472  O   LEU   289      59.956  48.145  41.974
ATOM   4473  N   ARG   290      60.949  47.062  43.677
ATOM   4474  H   ARG   290      61.750  46.867  44.262
ATOM   4475  CA  ARG   290      59.657  46.478  44.177
ATOM   4476  HA  ARG   290      59.130  45.964  43.373
ATOM   4477  CB  ARG   290      59.814  45.491  45.239
ATOM   4478  HB2 ARG   290      60.413  44.691  44.805
ATOM   4479  HB3 ARG   290      60.468  45.878  46.019
ATOM   4480  CG  ARG   290      58.443  44.891  45.725
ATOM   4481  HG2 ARG   290      57.715  45.690  45.854
ATOM   4482  HG3 ARG   290      58.124  44.225  44.924
ATOM   4483  CD  ARG   290      58.521  44.161  47.041
ATOM   4484  HD2 ARG   290      57.541  43.737  47.255
ATOM   4485  HD3 ARG   290      59.243  43.347  46.971
ATOM   4486  NE  ARG   290      58.824  45.052  48.183
ATOM   4487  HE  ARG   290      59.808  45.138  48.395
ATOM   4488  CZ  ARG   290      58.035  45.759  48.941
ATOM   4489  NH1 ARG   290      56.746  45.877  48.725
ATOM   4490 HH11 ARG   290      56.406  45.646  47.802
ATOM   4491 HH12 ARG   290      56.216  46.516  49.301
ATOM   4492  NH2 ARG   290      58.540  46.443  49.963
ATOM   4493 HH21 ARG   290      59.546  46.413  50.043
ATOM   4494 HH22 ARG   290      57.930  46.755  50.705
ATOM   4495  C   ARG   290      58.904  47.662  44.666
ATOM   4496  O   ARG   290      57.754  47.905  44.306
ATOM   4497  N   ARG   291      59.507  48.402  45.637
ATOM   4498  H   ARG   291      60.441  48.141  45.921
ATOM   4499  CA  ARG   291      58.800  49.392  46.484
ATOM   4500  HA  ARG   291      57.859  48.899  46.730
ATOM   4501  CB  ARG   291      59.705  49.795  47.656
ATOM   4502  HB2 ARG   291      60.112  48.869  48.063
ATOM   4503  HB3 ARG   291      60.572  50.397  47.383
ATOM   4504  CG  ARG   291      59.119  50.615  48.790
ATOM   4505  HG2 ARG   291      59.682  50.387  49.695
ATOM   4506  HG3 ARG   291      59.305  51.674  48.607
ATOM   4507  CD  ARG   291      57.615  50.328  49.155
ATOM   4508  HD2 ARG   291      56.998  50.310  48.256
ATOM   4509  HD3 ARG   291      57.602  49.436  49.781
ATOM   4510  NE  ARG   291      57.095  51.449  49.996
ATOM   4511  HE  ARG   291      57.063  51.299  50.995
ATOM   4512  CZ  ARG   291      56.574  52.620  49.527
ATOM   4513  NH1 ARG   291      56.372  52.875  48.245
ATOM   4514 HH11 ARG   291      56.665  52.294  47.473
ATOM   4515 HH12 ARG   291      55.940  53.765  48.040
ATOM   4516  NH2 ARG   291      56.304  53.489  50.434
ATOM   4517 HH21 ARG   291      56.713  53.332  51.344
ATOM   4518 HH22 ARG   291      55.896  54.390  50.230
ATOM   4519  C   ARG   291      58.313  50.685  45.751
ATOM   4520  O   ARG   291      57.355  51.394  46.156
ATOM   4521  N   PHE   292      58.911  50.990  44.585
ATOM   4522  H   PHE   292      59.731  50.459  44.329
ATOM   4523  CA  PHE   292      58.437  52.039  43.667
ATOM   4524  HA  PHE   292      57.476  52.417  44.015
ATOM   4525  CB  PHE   292      59.435  53.215  43.583
ATOM   4526  HB2 PHE   292      60.316  52.929  43.007
ATOM   4527  HB3 PHE   292      58.921  54.016  43.052
ATOM   4528  CG  PHE   292      59.948  53.597  44.914
ATOM   4529  CD1 PHE   292      61.309  53.436  45.239
ATOM   4530  HD1 PHE   292      62.105  53.115  44.584
ATOM   4531  CE1 PHE   292      61.727  53.728  46.581
ATOM   4532  HE1 PHE   292      62.763  53.469  46.742
ATOM   4533  CZ  PHE   292      60.820  54.138  47.542
ATOM   4534  HZ  PHE   292      61.095  54.444  48.540
ATOM   4535  CE2 PHE   292      59.484  54.393  47.147
ATOM   4536  HE2 PHE   292      58.841  55.006  47.759
ATOM   4537  CD2 PHE   292      59.053  54.065  45.835
ATOM   4538  HD2 PHE   292      58.047  54.194  45.464
ATOM   4539  C   PHE   292      58.167  51.513  42.227
ATOM   4540  O   PHE   292      58.702  51.868  41.233
ATOM   4541  N   SER   293      57.274  50.537  42.106
ATOM   4542  H   SER   293      56.659  50.301  42.872
ATOM   4543  CA  SER   293      57.171  49.837  40.851
ATOM   4544  HA  SER   293      58.147  49.502  40.497
ATOM   4545  CB  SER   293      56.500  48.568  41.140
ATOM   4546  HB2 SER   293      55.844  48.565  42.010
ATOM   4547  HB3 SER   293      55.831  48.373  40.302
ATOM   4548  OG  SER   293      57.390  47.490  41.254
ATOM   4549  HG  SER   293      58.200  47.806  41.660
ATOM   4550  C   SER   293      56.595  50.617  39.564
ATOM   4551  O   SER   293      56.416  50.019  38.517
ATOM   4552  N   LEU   294      56.187  51.868  39.748
ATOM   4553  H   LEU   294      56.205  52.231  40.691
ATOM   4554  CA  LEU   294      55.969  52.941  38.742
ATOM   4555  HA  LEU   294      55.229  53.567  39.242
ATOM   4556  CB  LEU   294      57.268  53.739  38.595
ATOM   4557  HB2 LEU   294      56.928  54.686  38.176
ATOM   4558  HB3 LEU   294      57.702  53.964  39.570
ATOM   4559  CG  LEU   294      58.382  53.135  37.726
ATOM   4560  HG  LEU   294      58.240  52.061  37.851
ATOM   4561  CD1 LEU   294      58.308  53.398  36.176
ATOM   4562 HD11 LEU   294      59.251  53.181  35.674
ATOM   4563 HD12 LEU   294      57.493  52.849  35.705
ATOM   4564 HD13 LEU   294      58.026  54.429  35.962
ATOM   4565  CD2 LEU   294      59.779  53.602  38.158
ATOM   4566 HD21 LEU   294      59.867  53.542  39.244
ATOM   4567 HD22 LEU   294      60.480  52.943  37.647
ATOM   4568 HD23 LEU   294      59.970  54.639  37.882
ATOM   4569  C   LEU   294      55.217  52.683  37.375
ATOM   4570  O   LEU   294      54.737  53.664  36.792
ATOM   4571  N   VAL   295      55.273  51.482  36.758
ATOM   4572  H   VAL   295      55.692  50.691  37.226
ATOM   4573  CA  VAL   295      54.557  51.186  35.479
ATOM   4574  HA  VAL   295      54.551  52.025  34.782
ATOM   4575  CB  VAL   295      55.410  50.099  34.789
ATOM   4576  HB  VAL   295      55.343  49.153  35.326
ATOM   4577  CG1 VAL   295      54.821  49.702  33.434
ATOM   4578 HG11 VAL   295      54.619  50.605  32.858
ATOM   4579 HG12 VAL   295      55.535  49.108  32.864
ATOM   4580 HG13 VAL   295      53.853  49.216  33.557
ATOM   4581  CG2 VAL   295      56.896  50.473  34.559
ATOM   4582 HG21 VAL   295      57.370  49.765  33.879
ATOM   4583 HG22 VAL   295      56.954  51.456  34.093
ATOM   4584 HG23 VAL   295      57.447  50.466  35.500
ATOM   4585  C   VAL   295      53.129  50.728  35.617
ATOM   4586  O   VAL   295      52.766  50.077  36.607
ATOM   4587  N   ALA   296      52.232  51.165  34.692
ATOM   4588  H   ALA   296      52.612  51.804  34.007
ATOM   4589  CA  ALA   296      50.976  50.492  34.522
ATOM   4590  HA  ALA   296      51.033  49.528  35.026
ATOM   4591  CB  ALA   296      49.922  51.433  34.978
ATOM   4592  HB1 ALA   296      49.908  52.301  34.319
ATOM   4593  HB2 ALA   296      48.933  50.973  34.967
ATOM   4594  HB3 ALA   296      50.116  51.903  35.942
ATOM   4595  C   ALA   296      50.858  50.109  33.034
ATOM   4596  O   ALA   296      50.812  50.964  32.115
ATOM   4597  N   ASP   297      50.784  48.797  32.783
ATOM   4598  H   ASP   297      50.863  48.151  33.555
ATOM   4599  CA  ASP   297      50.742  48.316  31.415
ATOM   4600  HA  ASP   297      50.913  49.145  30.728
ATOM   4601  CB  ASP   297      51.961  47.488  31.117
ATOM   4602  HB2 ASP   297      51.983  47.574  30.030
ATOM   4603  HB3 ASP   297      52.828  47.891  31.643
ATOM   4604  CG  ASP   297      51.854  46.012  31.564
ATOM   4605  OD1 ASP   297      52.467  45.577  32.558
ATOM   4606  OD2 ASP   297      51.111  45.256  30.892
ATOM   4607  C   ASP   297      49.398  47.645  30.998
ATOM   4608  O   ASP   297      48.703  47.139  31.889
ATOM   4609  N   GLY   298      48.999  47.801  29.743
ATOM   4610  H   GLY   298      49.732  48.081  29.108
ATOM   4611  CA  GLY   298      47.707  47.700  29.128
ATOM   4612  HA2 GLY   298      46.960  47.890  29.899
ATOM   4613  HA3 GLY   298      47.721  48.523  28.414
ATOM   4614  C   GLY   298      47.385  46.422  28.405
ATOM   4615  O   GLY   298      47.069  46.529  27.243
ATOM   4616  N   ARG   299      47.516  45.324  29.099
ATOM   4617  H   ARG   299      47.643  45.451  30.092
ATOM   4618  CA  ARG   299      47.630  44.001  28.450
ATOM   4619  HA  ARG   299      48.561  43.931  27.887
ATOM   4620  CB  ARG   299      47.702  42.904  29.524
ATOM   4621  HB2 ARG   299      47.570  43.269  30.542
ATOM   4622  HB3 ARG   299      46.851  42.231  29.429
ATOM   4623  CG  ARG   299      48.957  41.979  29.343
ATOM   4624  HG2 ARG   299      48.857  41.139  30.031
ATOM   4625  HG3 ARG   299      48.909  41.558  28.339
ATOM   4626  CD  ARG   299      50.252  42.696  29.707
ATOM   4627  HD2 ARG   299      50.533  43.358  28.888
ATOM   4628  HD3 ARG   299      50.021  43.144  30.673
ATOM   4629  NE  ARG   299      51.290  41.647  29.804
ATOM   4630  HE  ARG   299      51.090  40.663  29.697
ATOM   4631  CZ  ARG   299      52.580  41.943  29.817
ATOM   4632  NH1 ARG   299      53.072  43.128  30.011
ATOM   4633 HH11 ARG   299      52.444  43.890  30.225
ATOM   4634 HH12 ARG   299      54.077  43.198  30.076
ATOM   4635  NH2 ARG   299      53.427  40.948  29.740
ATOM   4636 HH21 ARG   299      53.252  40.045  29.322
ATOM   4637 HH22 ARG   299      54.372  41.254  29.927
ATOM   4638  C   ARG   299      46.460  43.757  27.515
ATOM   4639  O   ARG   299      45.337  43.939  27.871
ATOM   4640  N   ILE   300      46.802  43.252  26.313
ATOM   4641  H   ILE   300      47.768  43.041  26.115
ATOM   4642  CA  ILE   300      45.896  42.863  25.162
ATOM   4643  HA  ILE   300      45.059  43.562  25.189
ATOM   4644  CB  ILE   300      46.604  43.074  23.811
ATOM   4645  HB  ILE   300      47.479  42.426  23.764
ATOM   4646  CG2 ILE   300      45.546  42.981  22.616
ATOM   4647 HG21 ILE   300      45.813  43.594  21.755
ATOM   4648 HG22 ILE   300      45.425  41.930  22.358
ATOM   4649 HG23 ILE   300      44.565  43.337  22.935
ATOM   4650  CG1 ILE   300      47.040  44.495  23.646
ATOM   4651 HG12 ILE   300      47.766  44.757  24.414
ATOM   4652 HG13 ILE   300      47.396  44.646  22.626
ATOM   4653  CD1 ILE   300      46.103  45.667  23.858
ATOM   4654 HD11 ILE   300      45.750  45.619  24.889
ATOM   4655 HD12 ILE   300      46.672  46.577  23.673
ATOM   4656 HD13 ILE   300      45.321  45.663  23.100
ATOM   4657  C   ILE   300      45.343  41.395  25.336
ATOM   4658  O   ILE   300      45.995  40.395  25.668
ATOM   4659  N   LEU   301      44.035  41.192  25.113
ATOM   4660  H   LEU   301      43.499  41.975  24.764
ATOM   4661  CA  LEU   301      43.353  39.863  25.126
ATOM   4662  HA  LEU   301      43.812  39.247  25.899
ATOM   4663  CB  LEU   301      41.881  40.007  25.536
ATOM   4664  HB2 LEU   301      41.494  40.902  25.047
ATOM   4665  HB3 LEU   301      41.487  39.056  25.174
ATOM   4666  CG  LEU   301      41.615  40.214  27.064
ATOM   4667  HG  LEU   301      40.567  40.494  27.173
ATOM   4668  CD1 LEU   301      41.881  38.968  27.874
ATOM   4669 HD11 LEU   301      41.164  38.214  27.545
ATOM   4670 HD12 LEU   301      42.936  38.724  27.749
ATOM   4671 HD13 LEU   301      41.613  39.227  28.898
ATOM   4672  CD2 LEU   301      42.451  41.289  27.665
ATOM   4673 HD21 LEU   301      42.122  42.234  27.235
ATOM   4674 HD22 LEU   301      42.159  41.382  28.712
ATOM   4675 HD23 LEU   301      43.475  40.938  27.544
ATOM   4676  C   LEU   301      43.553  39.189  23.772
ATOM   4677  O   LEU   301      43.107  39.737  22.698
ATOM   4678  N   THR   302      43.987  37.939  23.771
ATOM   4679  H   THR   302      44.466  37.660  24.615
ATOM   4680  CA  THR   302      44.239  37.144  22.506
ATOM   4681  HA  THR   302      44.547  37.895  21.778
ATOM   4682  CB  THR   302      45.250  36.092  22.756
ATOM   4683  HB  THR   302      45.283  35.580  21.794
ATOM   4684  CG2 THR   302      46.626  36.732  23.155
ATOM   4685 HG21 THR   302      47.056  37.211  22.276
ATOM   4686 HG22 THR   302      46.557  37.453  23.970
ATOM   4687 HG23 THR   302      47.321  35.929  23.399
ATOM   4688  OG1 THR   302      44.773  35.187  23.673
ATOM   4689  HG1 THR   302      45.417  34.483  23.561
ATOM   4690  C   THR   302      42.928  36.516  22.007
ATOM   4691  O   THR   302      42.750  36.460  20.809
ATOM   4692  N   SER   303      42.030  36.230  22.837
ATOM   4693  H   SER   303      42.300  36.465  23.782
ATOM   4694  CA  SER   303      41.065  35.209  22.530
ATOM   4695  HA  SER   303      40.691  35.222  21.505
ATOM   4696  CB  SER   303      41.828  33.868  22.667
ATOM   4697  HB2 SER   303      41.146  33.049  22.441
ATOM   4698  HB3 SER   303      42.680  33.883  21.987
ATOM   4699  OG  SER   303      42.353  33.740  24.012
ATOM   4700  HG  SER   303      43.147  34.278  24.049
ATOM   4701  C   SER   303      39.772  35.289  23.326
ATOM   4702  O   SER   303      38.680  35.428  22.738
ATOM   4703  N   ASP   304      39.831  35.206  24.638
ATOM   4704  H   ASP   304      40.735  35.109  25.077
ATOM   4705  CA  ASP   304      38.737  35.187  25.581
ATOM   4706  HA  ASP   304      37.980  35.893  25.240
ATOM   4707  CB  ASP   304      38.033  33.835  25.322
ATOM   4708  HB2 ASP   304      37.837  33.501  24.303
ATOM   4709  HB3 ASP   304      38.661  33.122  25.855
ATOM   4710  CG  ASP   304      36.607  33.800  25.975
ATOM   4711  OD1 ASP   304      36.437  33.306  27.151
ATOM   4712  OD2 ASP   304      35.676  34.226  25.286
ATOM   4713  C   ASP   304      39.223  35.368  27.064
ATOM   4714  O   ASP   304      40.380  35.055  27.329
ATOM   4715  N   TYR   305      38.340  35.625  27.999
ATOM   4716  H   TYR   305      37.394  35.797  27.692
ATOM   4717  CA  TYR   305      38.646  35.490  29.454
ATOM   4718  HA  TYR   305      39.132  34.527  29.608
ATOM   4719  CB  TYR   305      39.698  36.505  29.930
ATOM   4720  HB2 TYR   305      40.626  36.289  29.401
ATOM   4721  HB3 TYR   305      39.406  37.475  29.527
ATOM   4722  CG  TYR   305      40.076  36.618  31.387
ATOM   4723  CD1 TYR   305      40.246  35.470  32.168
ATOM   4724  HD1 TYR   305      40.020  34.486  31.784
ATOM   4725  CE1 TYR   305      40.571  35.521  33.543
ATOM   4726  HE1 TYR   305      40.520  34.658  34.190
ATOM   4727  CZ  TYR   305      40.670  36.803  34.130
ATOM   4728  OH  TYR   305      40.722  36.838  35.500
ATOM   4729  HH  TYR   305      40.806  36.005  35.970
ATOM   4730  CE2 TYR   305      40.588  38.016  33.298
ATOM   4731  HE2 TYR   305      40.580  39.015  33.708
ATOM   4732  CD2 TYR   305      40.285  37.917  31.980
ATOM   4733  HD2 TYR   305      40.133  38.811  31.392
ATOM   4734  C   TYR   305      37.317  35.592  30.233
ATOM   4735  O   TYR   305      36.626  36.577  30.087
ATOM   4736  N   GLU   306      37.049  34.605  31.099
ATOM   4737  H   GLU   306      37.615  33.768  31.091
ATOM   4738  CA  GLU   306      35.902  34.604  32.019
ATOM   4739  HA  GLU   306      35.180  35.359  31.705
ATOM   4740  CB  GLU   306      35.271  33.203  31.905
ATOM   4741  HB2 GLU   306      36.061  32.482  32.110
ATOM   4742  HB3 GLU   306      34.439  33.039  32.590
ATOM   4743  CG  GLU   306      34.596  32.953  30.539
ATOM   4744  HG2 GLU   306      33.978  33.834  30.364
ATOM   4745  HG3 GLU   306      35.408  32.937  29.813
ATOM   4746  CD  GLU   306      33.749  31.719  30.569
ATOM   4747  OE1 GLU   306      32.470  31.794  30.564
ATOM   4748  OE2 GLU   306      34.389  30.642  30.560
ATOM   4749  C   GLU   306      36.326  34.924  33.494
ATOM   4750  O   GLU   306      37.133  34.173  33.992
ATOM   4751  N   PHE   307      35.646  35.904  34.111
ATOM   4752  H   PHE   307      34.859  36.340  33.655
ATOM   4753  CA  PHE   307      35.717  36.152  35.523
ATOM   4754  HA  PHE   307      35.951  35.234  36.062
ATOM   4755  CB  PHE   307      36.849  37.121  35.835
ATOM   4756  HB2 PHE   307      36.962  37.283  36.907
ATOM   4757  HB3 PHE   307      37.801  36.780  35.428
ATOM   4758  CG  PHE   307      36.606  38.491  35.215
ATOM   4759  CD1 PHE   307      35.884  39.439  35.963
ATOM   4760  HD1 PHE   307      35.597  39.136  36.959
ATOM   4761  CE1 PHE   307      35.662  40.723  35.398
ATOM   4762  HE1 PHE   307      35.106  41.452  35.970
ATOM   4763  CZ  PHE   307      36.236  41.019  34.139
ATOM   4764  HZ  PHE   307      36.066  41.980  33.677
ATOM   4765  CE2 PHE   307      36.952  40.034  33.416
ATOM   4766  HE2 PHE   307      37.382  40.312  32.466
ATOM   4767  CD2 PHE   307      37.122  38.776  33.979
ATOM   4768  HD2 PHE   307      37.868  38.166  33.493
ATOM   4769  C   PHE   307      34.453  36.739  36.124
ATOM   4770  O   PHE   307      33.727  37.519  35.517
ATOM   4771  N   HIE   308      34.106  36.326  37.338
ATOM   4772  H   HIE   308      34.671  35.630  37.803
ATOM   4773  CA  HIE   308      32.879  36.731  38.093
ATOM   4774  HA  HIE   308      32.639  35.761  38.528
ATOM   4775  CB  HIE   308      33.233  37.910  38.990
ATOM   4776  HB2 HIE   308      33.691  38.644  38.329
ATOM   4777  HB3 HIE   308      32.388  38.386  39.487
ATOM   4778  CG  HIE   308      34.356  37.613  40.013
ATOM   4779  ND1 HIE   308      35.105  36.477  40.027
ATOM   4780  CE1 HIE   308      36.051  36.557  40.983
ATOM   4781  HE1 HIE   308      36.782  35.794  41.207
ATOM   4782  NE2 HIE   308      35.788  37.653  41.733
ATOM   4783  HE2 HIE   308      36.368  37.971  42.496
ATOM   4784  CD2 HIE   308      34.670  38.309  41.130
ATOM   4785  HD2 HIE   308      34.274  39.238  41.514
ATOM   4786  C   HIE   308      31.573  37.037  37.341
ATOM   4787  O   HIE   308      30.765  37.928  37.578
ATOM   4788  N   GLY   309      31.290  36.222  36.367
ATOM   4789  H   GLY   309      31.990  35.508  36.221
ATOM   4790  CA  GLY   309      30.165  36.212  35.384
ATOM   4791  HA2 GLY   309      29.989  35.187  35.055
ATOM   4792  HA3 GLY   309      29.306  36.511  35.986
ATOM   4793  C   GLY   309      30.306  37.106  34.106
ATOM   4794  O   GLY   309      29.542  36.912  33.202
ATOM   4795  N   VAL   310      31.380  37.933  34.063
ATOM   4796  H   VAL   310      31.944  37.899  34.900
ATOM   4797  CA  VAL   310      31.679  38.817  32.940
ATOM   4798  HA  VAL   310      30.750  38.974  32.392
ATOM   4799  CB  VAL   310      32.274  40.160  33.469
ATOM   4800  HB  VAL   310      33.243  39.843  33.855
ATOM   4801  CG1 VAL   310      32.511  41.272  32.376
ATOM   4802 HG11 VAL   310      31.542  41.552  31.964
ATOM   4803 HG12 VAL   310      32.955  42.173  32.796
ATOM   4804 HG13 VAL   310      33.114  40.872  31.561
ATOM   4805  CG2 VAL   310      31.499  40.777  34.662
ATOM   4806 HG21 VAL   310      30.554  41.047  34.191
ATOM   4807 HG22 VAL   310      31.337  40.075  35.481
ATOM   4808 HG23 VAL   310      31.964  41.682  35.052
ATOM   4809  C   VAL   310      32.672  38.126  31.958
ATOM   4810  O   VAL   310      33.303  37.129  32.351
ATOM   4811  N   GLN   311      32.778  38.557  30.678
ATOM   4812  H   GLN   311      32.305  39.359  30.287
ATOM   4813  CA  GLN   311      33.675  37.921  29.760
ATOM   4814  HA  GLN   311      34.474  37.415  30.301
ATOM   4815  CB  GLN   311      32.919  36.793  29.065
ATOM   4816  HB2 GLN   311      32.462  36.132  29.800
ATOM   4817  HB3 GLN   311      32.145  37.245  28.444
ATOM   4818  CG  GLN   311      33.770  35.936  28.135
ATOM   4819  HG2 GLN   311      34.293  36.551  27.402
ATOM   4820  HG3 GLN   311      34.526  35.411  28.721
ATOM   4821  CD  GLN   311      33.025  34.820  27.451
ATOM   4822  OE1 GLN   311      31.874  34.962  27.172
ATOM   4823  NE2 GLN   311      33.531  33.674  27.281
ATOM   4824 HE21 GLN   311      33.051  32.970  26.737
ATOM   4825 HE22 GLN   311      34.512  33.566  27.493
ATOM   4826  C   GLN   311      34.363  38.934  28.869
ATOM   4827  O   GLN   311      33.667  39.809  28.303
ATOM   4828  N   LEU   312      35.645  38.776  28.611
ATOM   4829  H   LEU   312      36.118  37.969  28.992
ATOM   4830  CA  LEU   312      36.410  39.696  27.740
ATOM   4831  HA  LEU   312      35.902  40.659  27.690
ATOM   4832  CB  LEU   312      37.767  40.169  28.234
ATOM   4833  HB2 LEU   312      38.415  39.298  28.336
ATOM   4834  HB3 LEU   312      38.146  40.946  27.572
ATOM   4835  CG  LEU   312      37.778  40.841  29.634
ATOM   4836  HG  LEU   312      37.564  40.096  30.400
ATOM   4837  CD1 LEU   312      39.168  41.359  30.064
ATOM   4838 HD11 LEU   312      39.187  41.621  31.122
ATOM   4839 HD12 LEU   312      39.852  40.539  29.849
ATOM   4840 HD13 LEU   312      39.521  42.202  29.470
ATOM   4841  CD2 LEU   312      36.785  42.050  29.731
ATOM   4842 HD21 LEU   312      37.254  42.797  29.092
ATOM   4843 HD22 LEU   312      35.805  41.822  29.309
ATOM   4844 HD23 LEU   312      36.675  42.340  30.775
ATOM   4845  C   LEU   312      36.522  39.169  26.284
ATOM   4846  O   LEU   312      36.299  37.976  26.057
ATOM   4847  N   LYS   313      36.857  39.891  25.302
ATOM   4848  H   LYS   313      36.924  40.885  25.470
ATOM   4849  CA  LYS   313      36.771  39.552  23.854
ATOM   4850  HA  LYS   313      36.458  38.520  23.693
ATOM   4851  CB  LYS   313      35.860  40.428  22.940
ATOM   4852  HB2 LYS   313      36.310  41.415  22.836
ATOM   4853  HB3 LYS   313      35.847  39.908  21.981
ATOM   4854  CG  LYS   313      34.385  40.328  23.382
ATOM   4855  HG2 LYS   313      34.063  39.312  23.152
ATOM   4856  HG3 LYS   313      34.302  40.448  24.462
ATOM   4857  CD  LYS   313      33.387  41.215  22.669
ATOM   4858  HD2 LYS   313      32.440  40.929  23.125
ATOM   4859  HD3 LYS   313      33.681  42.239  22.900
ATOM   4860  CE  LYS   313      33.315  41.054  21.134
ATOM   4861  HE2 LYS   313      34.339  41.067  20.763
ATOM   4862  HE3 LYS   313      32.877  40.108  20.817
ATOM   4863  NZ  LYS   313      32.491  42.080  20.445
ATOM   4864  HZ1 LYS   313      31.820  42.512  21.063
ATOM   4865  HZ2 LYS   313      33.105  42.871  20.308
ATOM   4866  HZ3 LYS   313      32.142  41.820  19.533
ATOM   4867  C   LYS   313      38.222  39.538  23.317
ATOM   4868  O   LYS   313      39.215  40.074  23.824
ATOM   4869  N   LYS   314      38.435  38.846  22.223
ATOM   4870  H   LYS   314      37.718  38.258  21.823
ATOM   4871  CA  LYS   314      39.590  39.058  21.354
ATOM   4872  HA  LYS   314      40.481  38.677  21.852
ATOM   4873  CB  LYS   314      39.491  38.177  20.050
ATOM   4874  HB2 LYS   314      39.453  37.169  20.462
ATOM   4875  HB3 LYS   314      38.560  38.519  19.596
ATOM   4876  CG  LYS   314      40.679  38.368  19.128
ATOM   4877  HG2 LYS   314      40.746  39.398  18.779
ATOM   4878  HG3 LYS   314      41.572  38.118  19.701
ATOM   4879  CD  LYS   314      40.519  37.232  18.084
ATOM   4880  HD2 LYS   314      40.213  36.251  18.448
ATOM   4881  HD3 LYS   314      39.680  37.510  17.446
ATOM   4882  CE  LYS   314      41.701  36.898  17.279
ATOM   4883  HE2 LYS   314      41.360  36.203  16.511
ATOM   4884  HE3 LYS   314      42.103  37.745  16.722
ATOM   4885  NZ  LYS   314      42.848  36.407  18.095
ATOM   4886  HZ1 LYS   314      43.731  36.460  17.608
ATOM   4887  HZ2 LYS   314      42.841  36.964  18.938
ATOM   4888  HZ3 LYS   314      42.705  35.443  18.363
ATOM   4889  C   LYS   314      39.760  40.637  21.008
ATOM   4890  O   LYS   314      38.809  41.306  20.540
ATOM   4891  N   GLY   315      40.922  41.147  21.187
ATOM   4892  H   GLY   315      41.485  40.628  21.845
ATOM   4893  CA  GLY   315      41.144  42.527  20.823
ATOM   4894  HA2 GLY   315      42.097  42.749  20.343
ATOM   4895  HA3 GLY   315      40.392  42.738  20.062
ATOM   4896  C   GLY   315      40.935  43.473  22.074
ATOM   4897  O   GLY   315      41.331  44.629  21.945
ATOM   4898  N   ASP   316      40.291  43.032  23.136
ATOM   4899  H   ASP   316      40.077  42.045  23.108
ATOM   4900  CA  ASP   316      40.040  43.868  24.336
ATOM   4901  HA  ASP   316      39.506  44.777  24.056
ATOM   4902  CB  ASP   316      38.938  43.058  25.124
ATOM   4903  HB2 ASP   316      38.280  42.655  24.355
ATOM   4904  HB3 ASP   316      39.359  42.220  25.678
ATOM   4905  CG  ASP   316      38.088  43.898  26.122
ATOM   4906  OD1 ASP   316      37.074  43.304  26.503
ATOM   4907  OD2 ASP   316      38.338  45.097  26.460
ATOM   4908  C   ASP   316      41.260  44.083  25.169
ATOM   4909  O   ASP   316      42.380  43.662  24.758
ATOM   4910  N   GLN   317      41.192  44.636  26.406
ATOM   4911  H   GLN   317      40.285  44.893  26.768
ATOM   4912  CA  GLN   317      42.433  44.877  27.197
ATOM   4913  HA  GLN   317      43.203  44.127  27.011
ATOM   4914  CB  GLN   317      43.141  46.114  26.524
ATOM   4915  HB2 GLN   317      44.115  46.130  27.012
ATOM   4916  HB3 GLN   317      43.298  45.814  25.488
ATOM   4917  CG  GLN   317      42.363  47.418  26.544
ATOM   4918  HG2 GLN   317      41.390  47.251  26.081
ATOM   4919  HG3 GLN   317      42.196  47.773  27.562
ATOM   4920  CD  GLN   317      42.813  48.552  25.714
ATOM   4921  OE1 GLN   317      43.846  48.409  25.043
ATOM   4922  NE2 GLN   317      42.091  49.639  25.784
ATOM   4923 HE21 GLN   317      42.489  50.430  25.298
ATOM   4924 HE22 GLN   317      41.241  49.662  26.328
ATOM   4925  C   GLN   317      42.137  45.162  28.631
ATOM   4926  O   GLN   317      41.133  45.691  28.989
ATOM   4927  N   ILE   318      43.166  44.954  29.464
ATOM   4928  H   ILE   318      43.945  44.419  29.106
ATOM   4929  CA  ILE   318      43.147  45.266  30.912
ATOM   4930  HA  ILE   318      42.339  45.978  31.078
ATOM   4931  CB  ILE   318      42.761  44.002  31.751
ATOM   4932  HB  ILE   318      41.830  43.656  31.299
ATOM   4933  CG2 ILE   318      43.658  42.829  31.455
ATOM   4934 HG21 ILE   318      43.594  42.543  30.405
ATOM   4935 HG22 ILE   318      44.699  42.999  31.733
ATOM   4936 HG23 ILE   318      43.249  42.032  32.075
ATOM   4937  CG1 ILE   318      42.594  44.224  33.220
ATOM   4938 HG12 ILE   318      43.555  44.402  33.704
ATOM   4939 HG13 ILE   318      42.003  45.137  33.297
ATOM   4940  CD1 ILE   318      41.800  43.155  33.924
ATOM   4941 HD11 ILE   318      42.446  42.289  34.063
ATOM   4942 HD12 ILE   318      41.519  43.581  34.888
ATOM   4943 HD13 ILE   318      40.904  42.860  33.378
ATOM   4944  C   ILE   318      44.457  45.906  31.480
ATOM   4945  O   ILE   318      45.585  45.393  31.234
ATOM   4946  N   LEU   319      44.366  47.052  32.224
ATOM   4947  H   LEU   319      43.471  47.448  32.472
ATOM   4948  CA  LEU   319      45.486  47.790  32.782
ATOM   4949  HA  LEU   319      46.290  47.812  32.046
ATOM   4950  CB  LEU   319      45.033  49.210  33.171
ATOM   4951  HB2 LEU   319      44.643  49.680  32.268
ATOM   4952  HB3 LEU   319      44.171  49.250  33.837
ATOM   4953  CG  LEU   319      46.203  50.023  33.676
ATOM   4954  HG  LEU   319      46.662  49.546  34.543
ATOM   4955  CD1 LEU   319      47.325  50.161  32.646
ATOM   4956 HD11 LEU   319      47.968  49.281  32.661
ATOM   4957 HD12 LEU   319      46.994  50.285  31.616
ATOM   4958 HD13 LEU   319      48.025  50.970  32.852
ATOM   4959  CD2 LEU   319      45.790  51.389  34.090
ATOM   4960 HD21 LEU   319      44.924  51.290  34.744
ATOM   4961 HD22 LEU   319      46.667  51.848  34.545
ATOM   4962 HD23 LEU   319      45.565  52.004  33.219
ATOM   4963  C   LEU   319      46.065  46.984  34.002
ATOM   4964  O   LEU   319      45.324  46.746  34.974
ATOM   4965  N   LEU   320      47.327  46.716  34.101
ATOM   4966  H   LEU   320      47.907  46.955  33.311
ATOM   4967  CA  LEU   320      47.966  45.951  35.211
ATOM   4968  HA  LEU   320      47.218  45.521  35.878
ATOM   4969  CB  LEU   320      48.769  44.820  34.539
ATOM   4970  HB2 LEU   320      49.589  45.258  33.971
ATOM   4971  HB3 LEU   320      49.211  44.274  35.372
ATOM   4972  CG  LEU   320      47.905  43.828  33.699
ATOM   4973  HG  LEU   320      47.809  44.361  32.753
ATOM   4974  CD1 LEU   320      48.756  42.576  33.410
ATOM   4975 HD11 LEU   320      48.200  41.861  32.803
ATOM   4976 HD12 LEU   320      49.579  42.968  32.813
ATOM   4977 HD13 LEU   320      49.215  42.267  34.350
ATOM   4978  CD2 LEU   320      46.501  43.324  34.314
ATOM   4979 HD21 LEU   320      45.887  44.172  34.619
ATOM   4980 HD22 LEU   320      45.925  42.681  33.648
ATOM   4981 HD23 LEU   320      46.612  42.662  35.173
ATOM   4982  C   LEU   320      48.884  46.974  35.945
ATOM   4983  O   LEU   320      50.129  47.071  35.626
ATOM   4984  N   PRO   321      48.483  47.625  37.065
ATOM   4985  CD  PRO   321      47.201  47.618  37.625
ATOM   4986  HD2 PRO   321      47.005  46.549  37.709
ATOM   4987  HD3 PRO   321      46.476  48.171  37.027
ATOM   4988  CG  PRO   321      47.226  48.285  38.958
ATOM   4989  HG2 PRO   321      47.243  47.613  39.816
ATOM   4990  HG3 PRO   321      46.365  48.951  38.992
ATOM   4991  CB  PRO   321      48.474  49.167  38.944
ATOM   4992  HB2 PRO   321      48.991  49.136  39.902
ATOM   4993  HB3 PRO   321      48.148  50.174  38.687
ATOM   4994  CA  PRO   321      49.381  48.443  37.889
ATOM   4995  HA  PRO   321      49.837  49.300  37.393
ATOM   4996  C   PRO   321      50.508  47.655  38.551
ATOM   4997  O   PRO   321      50.272  46.917  39.564
ATOM   4998  N   GLN   322      51.694  47.811  38.012
ATOM   4999  H   GLN   322      51.813  48.486  37.269
ATOM   5000  CA  GLN   322      52.908  47.322  38.575
ATOM   5001  HA  GLN   322      52.821  46.254  38.771
ATOM   5002  CB  GLN   322      54.088  47.404  37.554
ATOM   5003  HB2 GLN   322      54.378  48.437  37.361
ATOM   5004  HB3 GLN   322      54.960  46.891  37.959
ATOM   5005  CG  GLN   322      53.822  46.802  36.160
ATOM   5006  HG2 GLN   322      53.072  47.331  35.573
ATOM   5007  HG3 GLN   322      54.813  46.734  35.713
ATOM   5008  CD  GLN   322      53.325  45.330  36.222
ATOM   5009  OE1 GLN   322      53.434  44.652  37.238
ATOM   5010  NE2 GLN   322      52.693  44.733  35.277
ATOM   5011 HE21 GLN   322      52.243  43.831  35.309
ATOM   5012 HE22 GLN   322      52.682  45.237  34.401
ATOM   5013  C   GLN   322      53.190  47.947  39.970
ATOM   5014  O   GLN   322      53.602  47.152  40.791
ATOM   5015  N   MET   323      52.824  49.239  40.191
ATOM   5016  H   MET   323      52.227  49.707  39.524
ATOM   5017  CA  MET   323      52.716  49.787  41.532
ATOM   5018  HA  MET   323      53.740  49.865  41.901
ATOM   5019  CB  MET   323      52.196  51.262  41.536
ATOM   5020  HB2 MET   323      52.016  51.626  42.547
ATOM   5021  HB3 MET   323      52.940  51.862  41.014
ATOM   5022  CG  MET   323      50.999  51.610  40.697
ATOM   5023  HG2 MET   323      50.088  51.100  41.009
ATOM   5024  HG3 MET   323      50.843  52.667  40.915
ATOM   5025  SD  MET   323      51.182  51.573  38.862
ATOM   5026  CE  MET   323      51.803  53.251  38.629
ATOM   5027  HE1 MET   323      51.141  54.007  39.053
ATOM   5028  HE2 MET   323      52.763  53.346  39.137
ATOM   5029  HE3 MET   323      51.885  53.430  37.556
ATOM   5030  C   MET   323      51.915  48.913  42.546
ATOM   5031  O   MET   323      52.079  49.074  43.744
ATOM   5032  N   LEU   324      50.998  47.994  42.083
ATOM   5033  H   LEU   324      50.790  47.922  41.098
ATOM   5034  CA  LEU   324      50.213  47.106  42.956
ATOM   5035  HA  LEU   324      50.488  47.337  43.984
ATOM   5036  CB  LEU   324      48.686  47.391  42.586
ATOM   5037  HB2 LEU   324      48.471  47.088  41.561
ATOM   5038  HB3 LEU   324      48.116  46.694  43.200
ATOM   5039  CG  LEU   324      48.194  48.892  42.964
ATOM   5040  HG  LEU   324      48.817  49.527  42.335
ATOM   5041  CD1 LEU   324      46.771  49.038  42.478
ATOM   5042 HD11 LEU   324      46.711  49.040  41.390
ATOM   5043 HD12 LEU   324      46.234  48.169  42.857
ATOM   5044 HD13 LEU   324      46.309  49.968  42.806
ATOM   5045  CD2 LEU   324      48.466  49.282  44.411
ATOM   5046 HD21 LEU   324      48.129  50.250  44.782
ATOM   5047 HD22 LEU   324      48.243  48.503  45.139
ATOM   5048 HD23 LEU   324      49.551  49.297  44.510
ATOM   5049  C   LEU   324      50.607  45.586  42.855
ATOM   5050  O   LEU   324      50.515  44.723  43.751
ATOM   5051  N   SER   325      51.266  45.253  41.696
ATOM   5052  H   SER   325      51.157  45.956  40.978
ATOM   5053  CA  SER   325      52.117  44.024  41.615
ATOM   5054  HA  SER   325      51.481  43.169  41.844
ATOM   5055  CB  SER   325      52.720  43.849  40.170
ATOM   5056  HB2 SER   325      51.971  44.118  39.425
ATOM   5057  HB3 SER   325      53.576  44.490  39.958
ATOM   5058  OG  SER   325      53.072  42.445  40.035
ATOM   5059  HG  SER   325      53.431  42.289  39.158
ATOM   5060  C   SER   325      53.256  44.041  42.673
ATOM   5061  O   SER   325      53.670  42.944  43.236
ATOM   5062  N   GLY   326      53.923  45.181  42.876
ATOM   5063  H   GLY   326      53.632  45.896  42.224
ATOM   5064  CA  GLY   326      54.986  45.374  43.921
ATOM   5065  HA2 GLY   326      55.526  44.427  43.918
ATOM   5066  HA3 GLY   326      55.528  46.294  43.698
ATOM   5067  C   GLY   326      54.450  45.422  45.296
ATOM   5068  O   GLY   326      55.143  45.652  46.298
ATOM   5069  N   LEU   327      53.134  45.262  45.442
ATOM   5070  H   LEU   327      52.596  45.142  44.596
ATOM   5071  CA  LEU   327      52.394  45.451  46.733
ATOM   5072  HA  LEU   327      53.115  45.607  47.536
ATOM   5073  CB  LEU   327      51.607  46.782  46.661
ATOM   5074  HB2 LEU   327      52.269  47.481  46.150
ATOM   5075  HB3 LEU   327      50.689  46.712  46.076
ATOM   5076  CG  LEU   327      51.270  47.510  47.984
ATOM   5077  HG  LEU   327      50.710  46.846  48.643
ATOM   5078  CD1 LEU   327      52.558  47.989  48.822
ATOM   5079 HD11 LEU   327      53.238  47.150  48.958
ATOM   5080 HD12 LEU   327      53.063  48.797  48.292
ATOM   5081 HD13 LEU   327      52.323  48.301  49.840
ATOM   5082  CD2 LEU   327      50.364  48.713  47.802
ATOM   5083 HD21 LEU   327      50.758  49.359  47.018
ATOM   5084 HD22 LEU   327      49.421  48.392  47.357
ATOM   5085 HD23 LEU   327      50.202  49.289  48.712
ATOM   5086  C   LEU   327      51.479  44.262  47.077
ATOM   5087  O   LEU   327      51.060  44.190  48.200
ATOM   5088  N   ASP   328      51.076  43.405  46.212
ATOM   5089  H   ASP   328      50.984  43.641  45.234
ATOM   5090  CA  ASP   328      50.134  42.369  46.609
ATOM   5091  HA  ASP   328      49.189  42.760  46.987
ATOM   5092  CB  ASP   328      49.613  41.592  45.385
ATOM   5093  HB2 ASP   328      49.237  42.385  44.738
ATOM   5094  HB3 ASP   328      50.473  41.230  44.821
ATOM   5095  CG  ASP   328      48.522  40.537  45.521
ATOM   5096  OD1 ASP   328      48.286  39.847  44.533
ATOM   5097  OD2 ASP   328      47.962  40.358  46.613
ATOM   5098  C   ASP   328      50.669  41.372  47.700
ATOM   5099  O   ASP   328      51.613  40.645  47.374
ATOM   5100  N   GLU   329      49.947  41.174  48.779
ATOM   5101  H   GLU   329      49.113  41.743  48.798
ATOM   5102  CA  GLU   329      50.369  40.476  50.026
ATOM   5103  HA  GLU   329      51.446  40.630  50.089
ATOM   5104  CB  GLU   329      49.542  40.884  51.209
ATOM   5105  HB2 GLU   329      50.015  40.231  51.942
ATOM   5106  HB3 GLU   329      49.683  41.915  51.533
ATOM   5107  CG  GLU   329      48.069  40.641  51.029
ATOM   5108  HG2 GLU   329      47.731  41.234  50.180
ATOM   5109  HG3 GLU   329      47.845  39.619  50.723
ATOM   5110  CD  GLU   329      47.206  41.014  52.204
ATOM   5111  OE1 GLU   329      46.648  42.154  52.156
ATOM   5112  OE2 GLU   329      46.981  40.142  53.089
ATOM   5113  C   GLU   329      50.181  39.039  49.780
ATOM   5114  O   GLU   329      50.605  38.211  50.612
ATOM   5115  N   ARG   330      49.681  38.602  48.627
ATOM   5116  H   ARG   330      49.360  39.281  47.952
ATOM   5117  CA  ARG   330      49.711  37.207  48.005
ATOM   5118  HA  ARG   330      49.380  36.488  48.755
ATOM   5119  CB  ARG   330      48.681  37.170  46.827
ATOM   5120  HB2 ARG   330      48.863  37.990  46.133
ATOM   5121  HB3 ARG   330      48.725  36.169  46.397
ATOM   5122  CG  ARG   330      47.247  37.267  47.267
ATOM   5123  HG2 ARG   330      47.066  36.316  47.767
ATOM   5124  HG3 ARG   330      47.207  38.068  48.005
ATOM   5125  CD  ARG   330      46.370  37.509  46.071
ATOM   5126  HD2 ARG   330      46.692  38.281  45.372
ATOM   5127  HD3 ARG   330      46.389  36.575  45.510
ATOM   5128  NE  ARG   330      44.978  37.628  46.496
ATOM   5129  HE  ARG   330      44.809  37.669  47.491
ATOM   5130  CZ  ARG   330      43.913  37.823  45.698
ATOM   5131  NH1 ARG   330      43.976  37.659  44.419
ATOM   5132 HH11 ARG   330      44.714  37.107  44.007
ATOM   5133 HH12 ARG   330      43.085  37.846  43.981
ATOM   5134  NH2 ARG   330      42.693  38.066  46.195
ATOM   5135 HH21 ARG   330      42.630  38.236  47.188
ATOM   5136 HH22 ARG   330      41.936  38.189  45.536
ATOM   5137  C   ARG   330      51.106  36.847  47.439
ATOM   5138  O   ARG   330      51.463  35.700  47.365
ATOM   5139  N   GLU   331      51.857  37.896  47.010
ATOM   5140  H   GLU   331      51.523  38.833  47.187
ATOM   5141  CA  GLU   331      53.140  37.695  46.298
ATOM   5142  HA  GLU   331      53.243  36.612  46.224
ATOM   5143  CB  GLU   331      53.030  38.204  44.874
ATOM   5144  HB2 GLU   331      53.071  39.291  44.795
ATOM   5145  HB3 GLU   331      53.973  37.886  44.431
ATOM   5146  CG  GLU   331      51.772  37.691  44.151
ATOM   5147  HG2 GLU   331      50.814  37.963  44.596
ATOM   5148  HG3 GLU   331      51.645  38.133  43.163
ATOM   5149  CD  GLU   331      51.588  36.165  44.049
ATOM   5150  OE1 GLU   331      52.373  35.310  44.584
ATOM   5151  OE2 GLU   331      50.618  35.884  43.346
ATOM   5152  C   GLU   331      54.260  38.336  47.168
ATOM   5153  O   GLU   331      55.401  37.851  47.134
ATOM   5154  N   ASN   332      54.089  39.421  47.799
ATOM   5155  H   ASN   332      53.123  39.690  47.917
ATOM   5156  CA  ASN   332      55.119  40.273  48.352
ATOM   5157  HA  ASN   332      56.159  39.999  48.178
ATOM   5158  CB  ASN   332      54.775  41.722  47.959
ATOM   5159  HB2 ASN   332      53.760  41.908  48.309
ATOM   5160  HB3 ASN   332      55.406  42.442  48.481
ATOM   5161  CG  ASN   332      54.916  41.944  46.468
ATOM   5162  OD1 ASN   332      55.992  42.285  45.981
ATOM   5163  ND2 ASN   332      53.797  41.955  45.722
ATOM   5164 HD21 ASN   332      53.818  42.037  44.716
ATOM   5165 HD22 ASN   332      52.921  41.686  46.146
ATOM   5166  C   ASN   332      54.959  40.160  49.901
ATOM   5167  O   ASN   332      53.976  40.455  50.571
ATOM   5168  N   ALA   333      56.002  39.796  50.621
ATOM   5169  H   ALA   333      56.808  39.440  50.128
ATOM   5170  CA  ALA   333      56.084  39.551  52.056
ATOM   5171  HA  ALA   333      55.333  38.826  52.369
ATOM   5172  CB  ALA   333      57.407  38.875  52.464
ATOM   5173  HB1 ALA   333      58.225  39.514  52.130
ATOM   5174  HB2 ALA   333      57.479  38.937  53.550
ATOM   5175  HB3 ALA   333      57.404  37.879  52.021
ATOM   5176  C   ALA   333      55.859  40.804  52.942
ATOM   5177  O   ALA   333      55.051  40.641  53.895
ATOM   5178  N   CYS   334      56.493  41.955  52.643
ATOM   5179  H   CYS   334      57.061  41.966  51.809
ATOM   5180  CA  CYS   334      56.356  43.187  53.327
ATOM   5181  HA  CYS   334      55.688  43.078  54.182
ATOM   5182  CB  CYS   334      57.704  43.451  54.006
ATOM   5183  HB2 CYS   334      58.548  43.060  53.437
ATOM   5184  HB3 CYS   334      57.957  44.509  54.081
ATOM   5185  SG  CYS   334      57.678  42.836  55.673
ATOM   5186  HG  CYS   334      56.586  43.401  56.197
ATOM   5187  C   CYS   334      55.842  44.345  52.399
ATOM   5188  O   CYS   334      56.640  44.989  51.754
ATOM   5189  N   PRO   335      54.537  44.674  52.289
ATOM   5190  CD  PRO   335      53.512  43.742  52.838
ATOM   5191  HD2 PRO   335      53.421  44.038  53.883
ATOM   5192  HD3 PRO   335      53.716  42.682  52.692
ATOM   5193  CG  PRO   335      52.213  43.997  52.065
ATOM   5194  HG2 PRO   335      51.465  43.925  52.855
ATOM   5195  HG3 PRO   335      52.007  43.275  51.275
ATOM   5196  CB  PRO   335      52.419  45.422  51.548
ATOM   5197  HB2 PRO   335      52.055  46.140  52.285
ATOM   5198  HB3 PRO   335      51.857  45.617  50.635
ATOM   5199  CA  PRO   335      53.921  45.609  51.325
ATOM   5200  HA  PRO   335      54.251  45.150  50.394
ATOM   5201  C   PRO   335      54.462  47.055  51.369
ATOM   5202  O   PRO   335      55.049  47.535  50.428
ATOM   5203  N   MET   336      54.200  47.814  52.421
ATOM   5204  H   MET   336      53.725  47.387  53.203
ATOM   5205  CA  MET   336      54.784  49.156  52.582
ATOM   5206  HA  MET   336      54.684  49.680  51.632
ATOM   5207  CB  MET   336      53.830  49.889  53.535
ATOM   5208  HB2 MET   336      53.695  49.444  54.520
ATOM   5209  HB3 MET   336      54.265  50.878  53.687
ATOM   5210  CG  MET   336      52.414  50.222  52.988
ATOM   5211  HG2 MET   336      51.926  49.251  52.903
ATOM   5212  HG3 MET   336      51.880  50.763  53.770
ATOM   5213  SD  MET   336      52.495  51.080  51.291
ATOM   5214  CE  MET   336      50.671  51.410  51.134
ATOM   5215  HE1 MET   336      50.204  51.843  52.019
ATOM   5216  HE2 MET   336      50.463  52.123  50.336
ATOM   5217  HE3 MET   336      50.188  50.458  50.914
ATOM   5218  C   MET   336      56.165  49.266  53.164
ATOM   5219  O   MET   336      56.908  50.084  52.809
ATOM   5220  N   HIE   337      56.369  48.389  54.146
ATOM   5221  H   HIE   337      55.651  47.724  54.398
ATOM   5222  CA  HIE   337      57.633  48.256  54.851
ATOM   5223  HA  HIE   337      57.760  49.197  55.385
ATOM   5224  CB  HIE   337      57.439  47.319  56.003
ATOM   5225  HB2 HIE   337      56.782  47.719  56.776
ATOM   5226  HB3 HIE   337      56.883  46.444  55.666
ATOM   5227  CG  HIE   337      58.657  46.885  56.800
ATOM   5228  ND1 HIE   337      59.436  45.749  56.449
ATOM   5229  CE1 HIE   337      60.321  45.682  57.471
ATOM   5230  HE1 HIE   337      61.202  45.058  57.450
ATOM   5231  NE2 HIE   337      60.100  46.606  58.368
ATOM   5232  HE2 HIE   337      60.614  46.705  59.232
ATOM   5233  CD2 HIE   337      59.075  47.444  57.984
ATOM   5234  HD2 HIE   337      58.787  48.376  58.449
ATOM   5235  C   HIE   337      58.813  47.977  53.885
ATOM   5236  O   HIE   337      58.724  47.265  52.874
ATOM   5237  N   VAL   338      59.934  48.605  54.197
ATOM   5238  H   VAL   338      59.805  49.278  54.939
ATOM   5239  CA  VAL   338      61.158  48.667  53.386
ATOM   5240  HA  VAL   338      61.004  47.836  52.699
ATOM   5241  CB  VAL   338      61.094  49.887  52.499
ATOM   5242  HB  VAL   338      60.107  49.942  52.039
ATOM   5243  CG1 VAL   338      61.293  51.173  53.250
ATOM   5244 HG11 VAL   338      60.711  51.280  54.164
ATOM   5245 HG12 VAL   338      62.346  51.247  53.519
ATOM   5246 HG13 VAL   338      61.214  52.080  52.650
ATOM   5247  CG2 VAL   338      62.115  49.687  51.389
ATOM   5248 HG21 VAL   338      63.127  49.739  51.791
ATOM   5249 HG22 VAL   338      62.060  48.704  50.920
ATOM   5250 HG23 VAL   338      62.093  50.459  50.620
ATOM   5251  C   VAL   338      62.481  48.425  54.108
ATOM   5252  O   VAL   338      62.890  49.290  54.880
ATOM   5253  N   ASP   339      63.105  47.306  53.860
ATOM   5254  H   ASP   339      62.702  46.752  53.118
ATOM   5255  CA  ASP   339      64.379  46.886  54.431
ATOM   5256  HA  ASP   339      64.808  47.769  54.905
ATOM   5257  CB  ASP   339      63.995  45.980  55.654
ATOM   5258  HB2 ASP   339      63.426  46.506  56.421
ATOM   5259  HB3 ASP   339      63.330  45.183  55.323
ATOM   5260  CG  ASP   339      65.294  45.238  56.144
ATOM   5261  OD1 ASP   339      65.594  45.537  57.302
ATOM   5262  OD2 ASP   339      65.744  44.332  55.430
ATOM   5263  C   ASP   339      65.234  46.257  53.311
ATOM   5264  O   ASP   339      64.773  45.492  52.467
ATOM   5265  N   PHE   340      66.513  46.488  53.304
ATOM   5266  H   PHE   340      66.872  46.977  54.112
ATOM   5267  CA  PHE   340      67.414  46.113  52.173
ATOM   5268  HA  PHE   340      66.832  46.129  51.251
ATOM   5269  CB  PHE   340      68.573  47.031  52.030
ATOM   5270  HB2 PHE   340      69.128  46.956  52.966
ATOM   5271  HB3 PHE   340      69.142  46.658  51.180
ATOM   5272  CG  PHE   340      68.303  48.501  51.790
ATOM   5273  CD1 PHE   340      67.121  49.000  51.248
ATOM   5274  HD1 PHE   340      66.268  48.340  51.198
ATOM   5275  CE1 PHE   340      66.976  50.355  50.917
ATOM   5276  HE1 PHE   340      66.044  50.664  50.468
ATOM   5277  CZ  PHE   340      68.068  51.179  50.981
ATOM   5278  HZ  PHE   340      67.973  52.234  50.777
ATOM   5279  CE2 PHE   340      69.297  50.694  51.534
ATOM   5280  HE2 PHE   340      70.166  51.334  51.568
ATOM   5281  CD2 PHE   340      69.414  49.330  51.910
ATOM   5282  HD2 PHE   340      70.346  48.980  52.328
ATOM   5283  C   PHE   340      67.844  44.609  52.319
ATOM   5284  O   PHE   340      68.659  44.191  51.500
ATOM   5285  N   SER   341      67.359  43.840  53.270
ATOM   5286  H   SER   341      66.825  44.255  54.020
ATOM   5287  CA  SER   341      67.998  42.491  53.476
ATOM   5288  HA  SER   341      68.788  42.325  52.744
ATOM   5289  CB  SER   341      68.742  42.555  54.789
ATOM   5290  HB2 SER   341      68.194  43.234  55.443
ATOM   5291  HB3 SER   341      68.794  41.527  55.148
ATOM   5292  OG  SER   341      69.998  43.146  54.627
ATOM   5293  HG  SER   341      70.553  42.870  55.360
ATOM   5294  C   SER   341      67.022  41.304  53.383
ATOM   5295  O   SER   341      67.292  40.319  54.012
ATOM   5296  N   ARG   342      65.930  41.484  52.591
ATOM   5297  H   ARG   342      65.813  42.327  52.047
ATOM   5298  CA  ARG   342      64.973  40.362  52.188
ATOM   5299  HA  ARG   342      65.127  39.612  52.965
ATOM   5300  CB  ARG   342      63.511  40.853  52.103
ATOM   5301  HB2 ARG   342      63.437  41.693  51.414
ATOM   5302  HB3 ARG   342      62.878  40.004  51.850
ATOM   5303  CG  ARG   342      62.909  41.333  53.377
ATOM   5304  HG2 ARG   342      61.856  41.054  53.431
ATOM   5305  HG3 ARG   342      63.306  40.695  54.167
ATOM   5306  CD  ARG   342      63.081  42.845  53.624
ATOM   5307  HD2 ARG   342      62.862  43.165  54.642
ATOM   5308  HD3 ARG   342      64.111  43.174  53.477
ATOM   5309  NE  ARG   342      62.248  43.705  52.758
ATOM   5310  HE  ARG   342      62.539  43.768  51.793
ATOM   5311  CZ  ARG   342      61.109  44.367  53.126
ATOM   5312  NH1 ARG   342      60.540  45.192  52.296
ATOM   5313 HH11 ARG   342      60.935  45.356  51.380
ATOM   5314 HH12 ARG   342      59.751  45.763  52.561
ATOM   5315  NH2 ARG   342      60.579  44.166  54.303
ATOM   5316 HH21 ARG   342      61.019  43.526  54.949
ATOM   5317 HH22 ARG   342      59.868  44.772  54.686
ATOM   5318  C   ARG   342      65.426  39.710  50.804
ATOM   5319  O   ARG   342      66.164  40.371  50.074
ATOM   5320  N   GLN   343      65.125  38.453  50.630
ATOM   5321  H   GLN   343      64.461  38.049  51.274
ATOM   5322  CA  GLN   343      65.542  37.681  49.463
ATOM   5323  HA  GLN   343      66.528  38.021  49.145
ATOM   5324  CB  GLN   343      65.552  36.165  49.763
ATOM   5325  HB2 GLN   343      64.519  35.855  49.915
ATOM   5326  HB3 GLN   343      65.986  35.609  48.931
ATOM   5327  CG  GLN   343      66.320  35.767  51.080
ATOM   5328  HG2 GLN   343      67.315  36.212  51.097
ATOM   5329  HG3 GLN   343      65.750  36.091  51.951
ATOM   5330  CD  GLN   343      66.436  34.240  51.182
ATOM   5331  OE1 GLN   343      65.467  33.589  51.424
ATOM   5332  NE2 GLN   343      67.590  33.670  50.952
ATOM   5333 HE21 GLN   343      67.584  32.706  50.655
ATOM   5334 HE22 GLN   343      68.354  34.264  50.660
ATOM   5335  C   GLN   343      64.613  37.885  48.224
ATOM   5336  O   GLN   343      63.527  38.391  48.287
ATOM   5337  N   LYS   344      65.048  37.536  47.011
ATOM   5338  H   LYS   344      65.824  36.896  46.927
ATOM   5339  CA  LYS   344      64.594  38.030  45.707
ATOM   5340  HA  LYS   344      64.955  39.056  45.624
ATOM   5341  CB  LYS   344      65.165  37.171  44.560
ATOM   5342  HB2 LYS   344      64.887  37.694  43.645
ATOM   5343  HB3 LYS   344      66.240  37.099  44.727
ATOM   5344  CG  LYS   344      64.641  35.745  44.397
ATOM   5345  HG2 LYS   344      64.818  35.242  45.347
ATOM   5346  HG3 LYS   344      63.615  35.905  44.065
ATOM   5347  CD  LYS   344      65.405  34.954  43.314
ATOM   5348  HD2 LYS   344      66.395  34.815  43.749
ATOM   5349  HD3 LYS   344      64.791  34.056  43.242
ATOM   5350  CE  LYS   344      65.571  35.499  41.884
ATOM   5351  HE2 LYS   344      64.664  35.947  41.477
ATOM   5352  HE3 LYS   344      66.358  36.254  41.910
ATOM   5353  NZ  LYS   344      66.088  34.477  40.928
ATOM   5354  HZ1 LYS   344      66.876  33.952  41.279
ATOM   5355  HZ2 LYS   344      65.355  33.811  40.730
ATOM   5356  HZ3 LYS   344      66.485  34.924  40.114
ATOM   5357  C   LYS   344      63.125  38.306  45.562
ATOM   5358  O   LYS   344      62.341  37.439  45.944
ATOM   5359  N   VAL   345      62.780  39.471  44.947
ATOM   5360  H   VAL   345      63.509  40.062  44.573
ATOM   5361  CA  VAL   345      61.349  39.688  44.677
ATOM   5362  HA  VAL   345      60.773  39.526  45.589
ATOM   5363  CB  VAL   345      61.098  41.143  44.110
ATOM   5364  HB  VAL   345      60.024  41.267  43.957
ATOM   5365  CG1 VAL   345      61.734  42.128  45.106
ATOM   5366 HG11 VAL   345      61.552  43.150  44.773
ATOM   5367 HG12 VAL   345      61.146  42.152  46.023
ATOM   5368 HG13 VAL   345      62.799  42.005  45.303
ATOM   5369  CG2 VAL   345      61.644  41.359  42.690
ATOM   5370 HG21 VAL   345      62.658  40.994  42.524
ATOM   5371 HG22 VAL   345      61.140  40.708  41.976
ATOM   5372 HG23 VAL   345      61.614  42.411  42.408
ATOM   5373  C   VAL   345      60.651  38.735  43.667
ATOM   5374  O   VAL   345      61.280  38.121  42.856
ATOM   5375  N   SER   346      59.324  38.751  43.668
ATOM   5376  H   SER   346      58.974  39.275  44.459
ATOM   5377  CA  SER   346      58.444  37.713  43.054
ATOM   5378  HA  SER   346      59.050  36.967  42.542
ATOM   5379  CB  SER   346      57.667  36.960  44.101
ATOM   5380  HB2 SER   346      56.975  37.648  44.588
ATOM   5381  HB3 SER   346      57.011  36.233  43.622
ATOM   5382  OG  SER   346      58.597  36.260  44.961
ATOM   5383  HG  SER   346      58.131  35.734  45.616
ATOM   5384  C   SER   346      57.514  38.280  41.908
ATOM   5385  O   SER   346      56.865  37.458  41.201
ATOM   5386  N   HIE   347      57.471  39.599  41.777
ATOM   5387  H   HIE   347      58.023  40.174  42.399
ATOM   5388  CA  HIE   347      56.551  40.293  40.926
ATOM   5389  HA  HIE   347      55.564  39.852  41.061
ATOM   5390  CB  HIE   347      56.373  41.713  41.485
ATOM   5391  HB2 HIE   347      55.637  42.216  40.858
ATOM   5392  HB3 HIE   347      56.021  41.612  42.512
ATOM   5393  CG  HIE   347      57.623  42.573  41.492
ATOM   5394  ND1 HIE   347      58.395  42.871  40.385
ATOM   5395  CE1 HIE   347      59.485  43.493  40.830
ATOM   5396  HE1 HIE   347      60.298  43.777  40.179
ATOM   5397  NE2 HIE   347      59.357  43.651  42.198
ATOM   5398  HE2 HIE   347      60.054  44.129  42.751
ATOM   5399  CD2 HIE   347      58.216  43.024  42.665
ATOM   5400  HD2 HIE   347      57.913  42.651  43.634
ATOM   5401  C   HIE   347      56.927  40.259  39.431
ATOM   5402  O   HIE   347      57.573  39.340  38.875
ATOM   5403  N   THR   348      56.557  41.364  38.694
ATOM   5404  H   THR   348      56.233  42.174  39.204
ATOM   5405  CA  THR   348      56.509  41.450  37.259
ATOM   5406  HA  THR   348      57.152  40.689  36.818
ATOM   5407  CB  THR   348      55.046  41.371  36.705
ATOM   5408  HB  THR   348      54.809  41.649  35.678
ATOM   5409  CG2 THR   348      54.531  39.924  36.775
ATOM   5410 HG21 THR   348      53.501  39.883  36.422
ATOM   5411 HG22 THR   348      55.221  39.238  36.283
ATOM   5412 HG23 THR   348      54.535  39.487  37.772
ATOM   5413  OG1 THR   348      54.193  42.061  37.591
ATOM   5414  HG1 THR   348      53.925  42.889  37.187
ATOM   5415  C   THR   348      57.043  42.778  36.688
ATOM   5416  O   THR   348      57.242  42.781  35.462
ATOM   5417  N   THR   349      57.542  43.712  37.512
ATOM   5418  H   THR   349      57.509  43.404  38.474
ATOM   5419  CA  THR   349      58.218  44.951  37.146
ATOM   5420  HA  THR   349      57.548  45.363  36.393
ATOM   5421  CB  THR   349      58.398  45.864  38.332
ATOM   5422  HB  THR   349      59.320  45.607  38.853
ATOM   5423  CG2 THR   349      58.467  47.303  37.911
ATOM   5424 HG21 THR   349      57.550  47.553  37.377
ATOM   5425 HG22 THR   349      58.807  47.919  38.743
ATOM   5426 HG23 THR   349      59.273  47.382  37.181
ATOM   5427  OG1 THR   349      57.255  45.684  39.171
ATOM   5428  HG1 THR   349      57.249  46.504  39.672
ATOM   5429  C   THR   349      59.604  44.742  36.416
ATOM   5430  O   THR   349      60.569  45.540  36.627
ATOM   5431  N   PHE   350      59.681  43.790  35.504
ATOM   5432  H   PHE   350      58.834  43.258  35.363
ATOM   5433  CA  PHE   350      60.802  43.290  34.695
ATOM   5434  HA  PHE   350      61.147  44.165  34.144
ATOM   5435  CB  PHE   350      61.959  42.767  35.565
ATOM   5436  HB2 PHE   350      62.887  42.476  35.074
ATOM   5437  HB3 PHE   350      62.228  43.533  36.293
ATOM   5438  CG  PHE   350      61.591  41.624  36.478
ATOM   5439  CD1 PHE   350      61.095  41.879  37.754
ATOM   5440  HD1 PHE   350      60.956  42.898  38.088
ATOM   5441  CE1 PHE   350      60.747  40.834  38.595
ATOM   5442  HE1 PHE   350      60.430  41.087  39.597
ATOM   5443  CZ  PHE   350      60.870  39.459  38.188
ATOM   5444  HZ  PHE   350      60.455  38.641  38.758
ATOM   5445  CE2 PHE   350      61.388  39.228  36.936
ATOM   5446  HE2 PHE   350      61.513  38.211  36.596
ATOM   5447  CD2 PHE   350      61.726  40.261  36.086
ATOM   5448  HD2 PHE   350      62.221  40.114  35.137
ATOM   5449  C   PHE   350      60.527  42.112  33.694
ATOM   5450  O   PHE   350      61.335  41.865  32.804
ATOM   5451  N   GLY   351      59.253  41.583  33.698
ATOM   5452  H   GLY   351      58.589  41.836  34.416
ATOM   5453  CA  GLY   351      58.892  40.473  32.739
ATOM   5454  HA2 GLY   351      57.982  40.902  32.319
ATOM   5455  HA3 GLY   351      59.681  40.224  32.031
ATOM   5456  C   GLY   351      58.625  39.156  33.515
ATOM   5457  O   GLY   351      58.759  38.979  34.699
ATOM   5458  N   HIE   352      58.236  38.151  32.715
ATOM   5459  H   HIE   352      58.247  38.350  31.724
ATOM   5460  CA  HIE   352      57.900  36.836  33.244
ATOM   5461  HA  HIE   352      58.663  36.537  33.961
ATOM   5462  CB  HIE   352      56.553  36.958  33.987
ATOM   5463  HB2 HIE   352      56.546  37.756  34.730
ATOM   5464  HB3 HIE   352      55.798  37.235  33.251
ATOM   5465  CG  HIE   352      56.053  35.684  34.619
ATOM   5466  ND1 HIE   352      56.672  34.389  34.625
ATOM   5467  CE1 HIE   352      55.798  33.653  35.376
ATOM   5468  HE1 HIE   352      55.953  32.591  35.493
ATOM   5469  NE2 HIE   352      54.697  34.306  35.668
ATOM   5470  HE2 HIE   352      53.829  33.914  36.006
ATOM   5471  CD2 HIE   352      54.808  35.564  35.178
ATOM   5472  HD2 HIE   352      54.109  36.383  35.257
ATOM   5473  C   HIE   352      57.859  35.829  32.074
ATOM   5474  O   HIE   352      58.890  35.656  31.504
ATOM   5475  N   GLY   353      56.748  35.237  31.640
ATOM   5476  H   GLY   353      55.920  35.515  32.147
ATOM   5477  CA  GLY   353      56.736  34.247  30.565
ATOM   5478  HA2 GLY   353      57.733  33.808  30.517
ATOM   5479  HA3 GLY   353      56.053  33.438  30.826
ATOM   5480  C   GLY   353      56.442  34.834  29.250
ATOM   5481  O   GLY   353      57.133  34.445  28.315
ATOM   5482  N   SER   354      55.510  35.789  29.168
ATOM   5483  H   SER   354      55.068  36.030  30.043
ATOM   5484  CA  SER   354      54.977  36.197  27.877
ATOM   5485  HA  SER   354      54.759  35.371  27.200
ATOM   5486  CB  SER   354      53.639  36.854  28.157
ATOM   5487  HB2 SER   354      53.309  37.250  27.197
ATOM   5488  HB3 SER   354      53.042  36.067  28.617
ATOM   5489  OG  SER   354      53.653  37.987  29.053
ATOM   5490  HG  SER   354      54.056  37.694  29.873
ATOM   5491  C   SER   354      55.863  37.247  27.184
ATOM   5492  O   SER   354      56.209  36.951  26.045
ATOM   5493  N   HID   355      56.356  38.275  27.866
ATOM   5494  H   HID   355      55.926  38.455  28.762
ATOM   5495  CA  HID   355      57.291  39.154  27.352
ATOM   5496  HA  HID   355      57.848  38.710  26.528
ATOM   5497  CB  HID   355      56.631  40.408  26.840
ATOM   5498  HB2 HID   355      55.660  40.468  27.333
ATOM   5499  HB3 HID   355      57.294  41.217  27.147
ATOM   5500  CG  HID   355      56.314  40.418  25.374
ATOM   5501  ND1 HID   355      57.075  41.085  24.435
ATOM   5502  HD1 HID   355      57.941  41.584  24.581
ATOM   5503  CE1 HID   355      56.686  40.758  23.182
ATOM   5504  HE1 HID   355      57.043  41.198  22.263
ATOM   5505  NE2 HID   355      55.706  39.878  23.279
ATOM   5506  CD2 HID   355      55.363  39.735  24.669
ATOM   5507  HD2 HID   355      54.522  39.189  25.071
ATOM   5508  C   HID   355      58.398  39.327  28.442
ATOM   5509  O   HID   355      58.271  38.767  29.522
ATOM   5510  N   LEU   356      59.501  40.106  28.222
ATOM   5511  H   LEU   356      59.430  40.685  27.398
ATOM   5512  CA  LEU   356      60.587  40.329  29.182
ATOM   5513  HA  LEU   356      60.205  40.304  30.202
ATOM   5514  CB  LEU   356      61.581  39.201  29.149
ATOM   5515  HB2 LEU   356      60.969  38.356  29.465
ATOM   5516  HB3 LEU   356      61.972  39.046  28.144
ATOM   5517  CG  LEU   356      62.831  39.247  30.093
ATOM   5518  HG  LEU   356      63.334  40.210  30.012
ATOM   5519  CD1 LEU   356      62.485  38.893  31.529
ATOM   5520 HD11 LEU   356      61.476  39.268  31.695
ATOM   5521 HD12 LEU   356      62.447  37.815  31.687
ATOM   5522 HD13 LEU   356      63.193  39.286  32.258
ATOM   5523  CD2 LEU   356      63.899  38.262  29.612
ATOM   5524 HD21 LEU   356      63.621  37.209  29.653
ATOM   5525 HD22 LEU   356      64.146  38.415  28.562
ATOM   5526 HD23 LEU   356      64.799  38.290  30.228
ATOM   5527  C   LEU   356      61.263  41.691  28.867
ATOM   5528  O   LEU   356      61.626  41.891  27.677
ATOM   5529  N   CYM   357      61.595  42.505  29.922
ATOM   5530  HN  CYM   357      61.218  42.288  30.833
ATOM   5531  CA  CYM   357      62.411  43.719  29.730
ATOM   5532  HA  CYM   357      61.927  44.327  28.966
ATOM   5533  CB  CYM   357      62.463  44.549  30.992
ATOM   5534  HB3 CYM   357      62.881  43.965  31.812
ATOM   5535  HB2 CYM   357      61.463  44.945  31.168
ATOM   5536  SG  CYM   357      63.536  45.979  30.551
ATOM   5537  C   CYM   357      63.836  43.494  29.185
ATOM   5538  O   CYM   357      64.638  42.696  29.695
ATOM   5539  N   LEU   358      64.148  44.119  28.055
ATOM   5540  H   LEU   358      63.512  44.879  27.860
ATOM   5541  CA  LEU   358      65.483  44.056  27.419
ATOM   5542  HA  LEU   358      65.957  43.075  27.400
ATOM   5543  CB  LEU   358      65.196  44.351  25.930
ATOM   5544  HB2 LEU   358      64.675  45.308  25.911
ATOM   5545  HB3 LEU   358      66.143  44.624  25.465
ATOM   5546  CG  LEU   358      64.524  43.188  25.056
ATOM   5547  HG  LEU   358      63.501  42.978  25.367
ATOM   5548  CD1 LEU   358      64.409  43.657  23.610
ATOM   5549 HD11 LEU   358      65.333  43.900  23.085
ATOM   5550 HD12 LEU   358      63.884  42.884  23.050
ATOM   5551 HD13 LEU   358      63.746  44.522  23.597
ATOM   5552  CD2 LEU   358      65.402  41.898  25.059
ATOM   5553 HD21 LEU   358      65.483  41.454  26.051
ATOM   5554 HD22 LEU   358      65.037  41.141  24.365
ATOM   5555 HD23 LEU   358      66.309  42.289  24.599
ATOM   5556  C   LEU   358      66.533  44.976  28.067
ATOM   5557  O   LEU   358      67.718  44.633  28.008
ATOM   5558  N   GLY   359      66.097  46.078  28.723
ATOM   5559  H   GLY   359      65.090  46.138  28.790
ATOM   5560  CA  GLY   359      66.926  47.192  29.038
ATOM   5561  HA2 GLY   359      67.928  47.068  28.627
ATOM   5562  HA3 GLY   359      66.404  48.057  28.626
ATOM   5563  C   GLY   359      67.057  47.529  30.587
ATOM   5564  O   GLY   359      68.034  48.161  30.894
ATOM   5565  N   GLN   360      66.192  47.103  31.522
ATOM   5566  H   GLN   360      65.338  46.664  31.210
ATOM   5567  CA  GLN   360      66.339  47.387  32.935
ATOM   5568  HA  GLN   360      66.275  48.474  32.929
ATOM   5569  CB  GLN   360      65.203  46.902  33.823
ATOM   5570  HB2 GLN   360      65.214  47.552  34.697
ATOM   5571  HB3 GLN   360      64.293  47.201  33.303
ATOM   5572  CG  GLN   360      64.986  45.445  34.271
ATOM   5573  HG2 GLN   360      64.666  44.933  33.363
ATOM   5574  HG3 GLN   360      65.812  44.916  34.749
ATOM   5575  CD  GLN   360      63.868  45.459  35.259
ATOM   5576  OE1 GLN   360      64.098  45.144  36.376
ATOM   5577  NE2 GLN   360      62.729  45.968  34.983
ATOM   5578 HE21 GLN   360      62.006  45.878  35.682
ATOM   5579 HE22 GLN   360      62.602  46.315  34.043
ATOM   5580  C   GLN   360      67.759  47.130  33.475
ATOM   5581  O   GLN   360      68.165  47.826  34.471
ATOM   5582  N   HIE   361      68.597  46.290  32.899
ATOM   5583  H   HIE   361      68.282  45.748  32.106
ATOM   5584  CA  HIE   361      70.010  46.229  33.268
ATOM   5585  HA  HIE   361      70.008  45.905  34.308
ATOM   5586  CB  HIE   361      70.666  45.089  32.542
ATOM   5587  HB2 HIE   361      71.653  45.009  32.996
ATOM   5588  HB3 HIE   361      70.102  44.157  32.586
ATOM   5589  CG  HIE   361      70.912  45.361  31.082
ATOM   5590  ND1 HIE   361      72.149  45.488  30.490
ATOM   5591  CE1 HIE   361      71.914  45.689  29.171
ATOM   5592  HE1 HIE   361      72.743  45.831  28.493
ATOM   5593  NE2 HIE   361      70.572  45.668  28.955
ATOM   5594  HE2 HIE   361      70.248  45.784  28.005
ATOM   5595  CD2 HIE   361      69.942  45.389  30.169
ATOM   5596  HD2 HIE   361      68.877  45.350  30.337
ATOM   5597  C   HIE   361      70.786  47.499  33.230
ATOM   5598  O   HIE   361      71.671  47.725  34.042
ATOM   5599  N   LEU   362      70.529  48.358  32.298
ATOM   5600  H   LEU   362      69.702  48.182  31.746
ATOM   5601  CA  LEU   362      71.036  49.787  32.230
ATOM   5602  HA  LEU   362      72.123  49.836  32.313
ATOM   5603  CB  LEU   362      70.663  50.432  30.877
ATOM   5604  HB2 LEU   362      69.638  50.801  30.898
ATOM   5605  HB3 LEU   362      71.293  51.306  30.710
ATOM   5606  CG  LEU   362      70.883  49.553  29.582
ATOM   5607  HG  LEU   362      70.269  48.654  29.604
ATOM   5608  CD1 LEU   362      70.471  50.421  28.346
ATOM   5609 HD11 LEU   362      69.405  50.641  28.295
ATOM   5610 HD12 LEU   362      71.076  51.325  28.280
ATOM   5611 HD13 LEU   362      70.650  49.786  27.478
ATOM   5612  CD2 LEU   362      72.415  49.140  29.380
ATOM   5613 HD21 LEU   362      72.941  48.758  30.255
ATOM   5614 HD22 LEU   362      72.560  48.397  28.595
ATOM   5615 HD23 LEU   362      72.986  50.018  29.080
ATOM   5616  C   LEU   362      70.493  50.688  33.382
ATOM   5617  O   LEU   362      71.325  51.194  34.182
ATOM   5618  N   ALA   363      69.154  50.786  33.498
ATOM   5619  H   ALA   363      68.499  50.290  32.910
ATOM   5620  CA  ALA   363      68.581  51.483  34.570
ATOM   5621  HA  ALA   363      68.821  52.543  34.470
ATOM   5622  CB  ALA   363      67.076  51.234  34.434
ATOM   5623  HB1 ALA   363      66.637  51.687  35.323
ATOM   5624  HB2 ALA   363      66.756  51.763  33.536
ATOM   5625  HB3 ALA   363      66.855  50.170  34.337
ATOM   5626  C   ALA   363      69.101  51.014  35.974
ATOM   5627  O   ALA   363      69.521  51.818  36.806
ATOM   5628  N   ARG   364      68.995  49.695  36.267
ATOM   5629  H   ARG   364      68.764  49.014  35.559
ATOM   5630  CA  ARG   364      69.436  49.181  37.564
ATOM   5631  HA  ARG   364      68.862  49.701  38.330
ATOM   5632  CB  ARG   364      69.027  47.687  37.717
ATOM   5633  HB2 ARG   364      69.400  47.192  36.821
ATOM   5634  HB3 ARG   364      69.515  47.311  38.617
ATOM   5635  CG  ARG   364      67.490  47.567  37.865
ATOM   5636  HG2 ARG   364      67.246  47.921  38.867
ATOM   5637  HG3 ARG   364      66.956  48.265  37.220
ATOM   5638  CD  ARG   364      66.895  46.173  37.635
ATOM   5639  HD2 ARG   364      65.811  46.250  37.723
ATOM   5640  HD3 ARG   364      67.096  45.868  36.607
ATOM   5641  NE  ARG   364      67.421  45.120  38.439
ATOM   5642  HE  ARG   364      68.406  45.206  38.648
ATOM   5643  CZ  ARG   364      66.795  44.025  38.747
ATOM   5644  NH1 ARG   364      67.291  43.117  39.507
ATOM   5645 HH11 ARG   364      68.192  43.292  39.927
ATOM   5646 HH12 ARG   364      66.853  42.215  39.627
ATOM   5647  NH2 ARG   364      65.561  43.751  38.404
ATOM   5648 HH21 ARG   364      65.019  44.437  37.896
ATOM   5649 HH22 ARG   364      65.200  42.851  38.688
ATOM   5650  C   ARG   364      70.994  49.392  37.713
ATOM   5651  O   ARG   364      71.316  49.771  38.822
ATOM   5652  N   ARG   365      71.798  49.366  36.679
ATOM   5653  H   ARG   365      71.424  49.022  35.807
ATOM   5654  CA  ARG   365      73.199  49.778  36.811
ATOM   5655  HA  ARG   365      73.754  49.290  37.612
ATOM   5656  CB  ARG   365      73.872  49.523  35.452
ATOM   5657  HB2 ARG   365      73.742  48.469  35.208
ATOM   5658  HB3 ARG   365      73.315  50.159  34.763
ATOM   5659  CG  ARG   365      75.358  49.971  35.346
ATOM   5660  HG2 ARG   365      75.366  51.059  35.410
ATOM   5661  HG3 ARG   365      75.942  49.504  36.138
ATOM   5662  CD  ARG   365      76.106  49.720  34.011
ATOM   5663  HD2 ARG   365      77.147  50.043  33.993
ATOM   5664  HD3 ARG   365      76.048  48.653  33.794
ATOM   5665  NE  ARG   365      75.347  50.474  33.003
ATOM   5666  HE  ARG   365      74.738  51.189  33.373
ATOM   5667  CZ  ARG   365      75.455  50.569  31.703
ATOM   5668  NH1 ARG   365      76.300  49.886  30.915
ATOM   5669 HH11 ARG   365      76.938  49.262  31.388
ATOM   5670 HH12 ARG   365      76.316  50.024  29.914
ATOM   5671  NH2 ARG   365      74.615  51.369  31.136
ATOM   5672 HH21 ARG   365      73.936  51.940  31.619
ATOM   5673 HH22 ARG   365      74.604  51.430  30.128
ATOM   5674  C   ARG   365      73.268  51.252  37.152
ATOM   5675  O   ARG   365      73.964  51.529  38.148
ATOM   5676  N   GLU   366      72.594  52.119  36.416
ATOM   5677  H   GLU   366      72.081  51.865  35.584
ATOM   5678  CA  GLU   366      72.782  53.551  36.716
ATOM   5679  HA  GLU   366      73.782  53.982  36.670
ATOM   5680  CB  GLU   366      72.059  54.412  35.682
ATOM   5681  HB2 GLU   366      71.195  53.780  35.477
ATOM   5682  HB3 GLU   366      71.781  55.298  36.252
ATOM   5683  CG  GLU   366      72.758  54.760  34.309
ATOM   5684  HG2 GLU   366      71.911  55.130  33.731
ATOM   5685  HG3 GLU   366      73.460  55.593  34.333
ATOM   5686  CD  GLU   366      73.346  53.621  33.530
ATOM   5687  OE1 GLU   366      72.775  53.223  32.466
ATOM   5688  OE2 GLU   366      74.329  52.987  34.038
ATOM   5689  C   GLU   366      72.260  53.773  38.176
ATOM   5690  O   GLU   366      72.866  54.588  38.892
ATOM   5691  N   ILE   367      71.287  53.019  38.676
ATOM   5692  H   ILE   367      70.784  52.421  38.036
ATOM   5693  CA  ILE   367      70.920  53.022  40.128
ATOM   5694  HA  ILE   367      70.810  54.047  40.482
ATOM   5695  CB  ILE   367      69.661  52.290  40.444
ATOM   5696  HB  ILE   367      69.876  51.301  40.043
ATOM   5697  CG2 ILE   367      69.291  52.163  41.934
ATOM   5698 HG21 ILE   367      68.271  51.837  42.140
ATOM   5699 HG22 ILE   367      69.929  51.459  42.468
ATOM   5700 HG23 ILE   367      69.440  53.129  42.415
ATOM   5701  CG1 ILE   367      68.462  52.928  39.633
ATOM   5702 HG12 ILE   367      68.837  53.418  38.736
ATOM   5703 HG13 ILE   367      67.843  52.132  39.218
ATOM   5704  CD1 ILE   367      67.590  53.959  40.300
ATOM   5705 HD11 ILE   367      67.135  53.400  41.118
ATOM   5706 HD12 ILE   367      68.156  54.831  40.624
ATOM   5707 HD13 ILE   367      66.933  54.418  39.560
ATOM   5708  C   ILE   367      72.096  52.526  40.988
ATOM   5709  O   ILE   367      72.613  53.270  41.806
ATOM   5710  N   ILE   368      72.532  51.289  40.748
ATOM   5711  H   ILE   368      72.031  50.766  40.044
ATOM   5712  CA  ILE   368      73.603  50.804  41.567
ATOM   5713  HA  ILE   368      73.250  50.877  42.595
ATOM   5714  CB  ILE   368      73.849  49.329  41.069
ATOM   5715  HB  ILE   368      74.134  49.305  40.017
ATOM   5716  CG2 ILE   368      74.927  48.688  41.948
ATOM   5717 HG21 ILE   368      74.969  47.607  41.815
ATOM   5718 HG22 ILE   368      75.920  49.026  41.652
ATOM   5719 HG23 ILE   368      74.739  48.938  42.992
ATOM   5720  CG1 ILE   368      72.606  48.431  41.271
ATOM   5721 HG12 ILE   368      72.604  48.047  42.291
ATOM   5722 HG13 ILE   368      71.640  48.880  41.044
ATOM   5723  CD1 ILE   368      72.610  47.084  40.424
ATOM   5724 HD11 ILE   368      71.667  47.090  39.877
ATOM   5725 HD12 ILE   368      73.411  47.206  39.694
ATOM   5726 HD13 ILE   368      72.715  46.208  41.063
ATOM   5727  C   ILE   368      74.865  51.579  41.580
ATOM   5728  O   ILE   368      75.549  51.509  42.541
ATOM   5729  N   VAL   369      75.085  52.332  40.484
ATOM   5730  H   VAL   369      74.496  52.241  39.668
ATOM   5731  CA  VAL   369      76.179  53.323  40.448
ATOM   5732  HA  VAL   369      77.064  52.948  40.962
ATOM   5733  CB  VAL   369      76.493  53.659  38.961
ATOM   5734  HB  VAL   369      75.569  53.931  38.452
ATOM   5735  CG1 VAL   369      77.420  54.906  38.743
ATOM   5736 HG11 VAL   369      78.384  54.707  39.211
ATOM   5737 HG12 VAL   369      77.485  54.996  37.659
ATOM   5738 HG13 VAL   369      76.988  55.840  39.103
ATOM   5739  CG2 VAL   369      77.088  52.524  38.127
ATOM   5740 HG21 VAL   369      76.640  51.557  38.358
ATOM   5741 HG22 VAL   369      77.007  52.812  37.079
ATOM   5742 HG23 VAL   369      78.124  52.302  38.384
ATOM   5743  C   VAL   369      75.738  54.629  41.201
ATOM   5744  O   VAL   369      76.472  55.060  42.020
ATOM   5745  N   THR   370      74.490  55.146  41.075
ATOM   5746  H   THR   370      73.766  54.545  40.708
ATOM   5747  CA  THR   370      73.995  56.305  41.770
ATOM   5748  HA  THR   370      74.664  57.154  41.629
ATOM   5749  CB  THR   370      72.587  56.623  41.335
ATOM   5750  HB  THR   370      72.031  55.712  41.558
ATOM   5751  CG2 THR   370      72.046  57.871  42.009
ATOM   5752 HG21 THR   370      71.413  57.697  42.878
ATOM   5753 HG22 THR   370      72.822  58.587  42.280
ATOM   5754 HG23 THR   370      71.435  58.332  41.233
ATOM   5755  OG1 THR   370      72.755  57.002  39.929
ATOM   5756  HG1 THR   370      72.712  56.207  39.393
ATOM   5757  C   THR   370      74.069  56.142  43.252
ATOM   5758  O   THR   370      74.320  57.057  43.995
ATOM   5759  N   LEU   371      73.663  54.965  43.695
ATOM   5760  H   LEU   371      73.333  54.266  43.045
ATOM   5761  CA  LEU   371      73.610  54.596  45.086
ATOM   5762  HA  LEU   371      73.231  55.456  45.638
ATOM   5763  CB  LEU   371      72.708  53.378  45.325
ATOM   5764  HB2 LEU   371      73.136  52.551  44.761
ATOM   5765  HB3 LEU   371      72.704  53.181  46.397
ATOM   5766  CG  LEU   371      71.237  53.384  44.904
ATOM   5767  HG  LEU   371      71.125  53.063  43.869
ATOM   5768  CD1 LEU   371      70.521  52.280  45.700
ATOM   5769 HD11 LEU   371      71.116  51.383  45.531
ATOM   5770 HD12 LEU   371      70.423  52.505  46.763
ATOM   5771 HD13 LEU   371      69.543  52.068  45.269
ATOM   5772  CD2 LEU   371      70.450  54.719  45.187
ATOM   5773 HD21 LEU   371      69.373  54.612  45.322
ATOM   5774 HD22 LEU   371      70.773  55.149  46.136
ATOM   5775 HD23 LEU   371      70.507  55.484  44.413
ATOM   5776  C   LEU   371      74.981  54.481  45.822
ATOM   5777  O   LEU   371      75.016  54.176  47.012
ATOM   5778  N   LYS   372      75.982  54.718  45.050
ATOM   5779  H   LYS   372      75.809  54.818  44.060
ATOM   5780  CA  LYS   372      77.405  54.874  45.464
ATOM   5781  HA  LYS   372      77.550  54.637  46.517
ATOM   5782  CB  LYS   372      78.328  53.931  44.590
ATOM   5783  HB2 LYS   372      78.227  53.996  43.507
ATOM   5784  HB3 LYS   372      79.344  54.222  44.860
ATOM   5785  CG  LYS   372      78.217  52.397  45.013
ATOM   5786  HG2 LYS   372      78.247  52.279  46.096
ATOM   5787  HG3 LYS   372      77.217  52.111  44.687
ATOM   5788  CD  LYS   372      79.335  51.575  44.411
ATOM   5789  HD2 LYS   372      80.299  52.062  44.564
ATOM   5790  HD3 LYS   372      79.472  50.626  44.928
ATOM   5791  CE  LYS   372      79.292  51.265  42.949
ATOM   5792  HE2 LYS   372      79.276  52.207  42.402
ATOM   5793  HE3 LYS   372      80.221  50.761  42.683
ATOM   5794  NZ  LYS   372      78.147  50.338  42.597
ATOM   5795  HZ1 LYS   372      78.076  49.496  43.152
ATOM   5796  HZ2 LYS   372      77.227  50.745  42.683
ATOM   5797  HZ3 LYS   372      78.279  50.024  41.647
ATOM   5798  C   LYS   372      77.863  56.369  45.248
ATOM   5799  O   LYS   372      78.260  57.039  46.212
ATOM   5800  N   GLU   373      77.877  56.807  44.019
ATOM   5801  H   GLU   373      77.421  56.242  43.317
ATOM   5802  CA  GLU   373      78.570  58.098  43.766
ATOM   5803  HA  GLU   373      79.613  58.048  44.077
ATOM   5804  CB  GLU   373      78.592  58.265  42.255
ATOM   5805  HB2 GLU   373      77.589  58.090  41.865
ATOM   5806  HB3 GLU   373      78.868  59.264  41.914
ATOM   5807  CG  GLU   373      79.412  57.231  41.550
ATOM   5808  HG2 GLU   373      79.159  56.212  41.846
ATOM   5809  HG3 GLU   373      79.259  57.264  40.470
ATOM   5810  CD  GLU   373      80.868  57.442  41.882
ATOM   5811  OE1 GLU   373      81.367  58.605  41.804
ATOM   5812  OE2 GLU   373      81.633  56.502  42.244
ATOM   5813  C   GLU   373      77.832  59.325  44.345
ATOM   5814  O   GLU   373      78.425  60.373  44.635
ATOM   5815  N   TRP   374      76.488  59.215  44.612
ATOM   5816  H   TRP   374      75.960  58.447  44.224
ATOM   5817  CA  TRP   374      75.815  60.347  45.430
ATOM   5818  HA  TRP   374      76.283  61.270  45.087
ATOM   5819  CB  TRP   374      74.343  60.437  44.990
ATOM   5820  HB2 TRP   374      74.367  60.420  43.900
ATOM   5821  HB3 TRP   374      73.778  59.574  45.343
ATOM   5822  CG  TRP   374      73.665  61.655  45.529
ATOM   5823  CD1 TRP   374      73.396  61.765  46.866
ATOM   5824  HD1 TRP   374      73.574  61.032  47.639
ATOM   5825  NE1 TRP   374      72.871  63.024  47.082
ATOM   5826  HE1 TRP   374      72.455  63.225  47.980
ATOM   5827  CE2 TRP   374      72.746  63.783  45.924
ATOM   5828  CZ2 TRP   374      72.296  65.068  45.684
ATOM   5829  HZ2 TRP   374      72.008  65.736  46.483
ATOM   5830  CH2 TRP   374      72.312  65.536  44.354
ATOM   5831  HH2 TRP   374      71.896  66.504  44.115
ATOM   5832  CZ3 TRP   374      72.764  64.684  43.280
ATOM   5833  HZ3 TRP   374      72.837  65.097  42.286
ATOM   5834  CE3 TRP   374      73.231  63.392  43.575
ATOM   5835  HE3 TRP   374      73.679  62.824  42.773
ATOM   5836  CD2 TRP   374      73.254  62.894  44.904
ATOM   5837  C   TRP   374      76.177  60.309  46.925
ATOM   5838  O   TRP   374      76.535  61.314  47.552
ATOM   5839  N   LEU   375      76.236  59.084  47.440
ATOM   5840  H   LEU   375      76.158  58.349  46.750
ATOM   5841  CA  LEU   375      76.376  58.692  48.860
ATOM   5842  HA  LEU   375      75.839  59.482  49.384
ATOM   5843  CB  LEU   375      75.804  57.240  48.999
ATOM   5844  HB2 LEU   375      76.171  56.667  48.147
ATOM   5845  HB3 LEU   375      76.238  56.781  49.886
ATOM   5846  CG  LEU   375      74.239  57.196  49.111
ATOM   5847  HG  LEU   375      74.005  56.140  49.243
ATOM   5848  CD1 LEU   375      73.723  57.916  50.342
ATOM   5849 HD11 LEU   375      73.605  58.984  50.160
ATOM   5850 HD12 LEU   375      72.657  57.693  50.395
ATOM   5851 HD13 LEU   375      74.185  57.624  51.285
ATOM   5852  CD2 LEU   375      73.428  57.584  47.820
ATOM   5853 HD21 LEU   375      73.498  58.671  47.767
ATOM   5854 HD22 LEU   375      73.874  57.053  46.979
ATOM   5855 HD23 LEU   375      72.391  57.274  47.938
ATOM   5856  C   LEU   375      77.694  58.906  49.455
ATOM   5857  O   LEU   375      77.850  59.515  50.491
ATOM   5858  N   THR   376      78.661  58.455  48.751
ATOM   5859  H   THR   376      78.385  57.974  47.907
ATOM   5860  CA  THR   376      80.171  58.725  48.923
ATOM   5861  HA  THR   376      80.610  58.177  49.757
ATOM   5862  CB  THR   376      81.025  58.178  47.780
ATOM   5863  HB  THR   376      82.039  58.578  47.791
ATOM   5864  CG2 THR   376      80.925  56.619  47.631
ATOM   5865 HG21 THR   376      79.907  56.291  47.838
ATOM   5866 HG22 THR   376      81.301  56.219  46.689
ATOM   5867 HG23 THR   376      81.629  56.166  48.328
ATOM   5868  OG1 THR   376      80.528  58.632  46.500
ATOM   5869  HG1 THR   376      79.800  58.036  46.313
ATOM   5870  C   THR   376      80.471  60.211  49.107
ATOM   5871  O   THR   376      81.372  60.567  49.920
ATOM   5872  N   ARG   377      79.729  61.064  48.435
ATOM   5873  H   ARG   377      79.132  60.767  47.678
ATOM   5874  CA  ARG   377      79.972  62.510  48.563
ATOM   5875  HA  ARG   377      80.959  62.737  48.968
ATOM   5876  CB  ARG   377      79.842  63.088  47.104
ATOM   5877  HB2 ARG   377      78.952  62.731  46.585
ATOM   5878  HB3 ARG   377      79.804  64.177  47.162
ATOM   5879  CG  ARG   377      81.094  62.798  46.292
ATOM   5880  HG2 ARG   377      81.997  63.145  46.795
ATOM   5881  HG3 ARG   377      81.174  61.713  46.222
ATOM   5882  CD  ARG   377      80.959  63.238  44.810
ATOM   5883  HD2 ARG   377      80.032  62.719  44.575
ATOM   5884  HD3 ARG   377      80.796  64.301  44.628
ATOM   5885  NE  ARG   377      82.060  62.733  44.026
ATOM   5886  HE  ARG   377      82.913  63.267  44.113
ATOM   5887  CZ  ARG   377      82.138  61.489  43.539
ATOM   5888  NH1 ARG   377      81.081  60.749  43.430
ATOM   5889 HH11 ARG   377      80.187  60.982  43.837
ATOM   5890 HH12 ARG   377      81.108  59.928  42.842
ATOM   5891  NH2 ARG   377      83.241  60.961  43.057
ATOM   5892 HH21 ARG   377      84.140  61.417  43.110
ATOM   5893 HH22 ARG   377      83.207  60.100  42.530
ATOM   5894  C   ARG   377      78.997  62.978  49.600
ATOM   5895  O   ARG   377      79.292  63.779  50.493
ATOM   5896  N   ILE   378      77.765  62.753  49.375
ATOM   5897  H   ILE   378      77.639  62.216  48.529
ATOM   5898  CA  ILE   378      76.619  63.453  50.080
ATOM   5899  HA  ILE   378      77.006  64.220  50.750
ATOM   5900  CB  ILE   378      75.653  64.270  49.073
ATOM   5901  HB  ILE   378      75.103  63.566  48.448
ATOM   5902  CG2 ILE   378      74.810  65.130  49.987
ATOM   5903 HG21 ILE   378      75.327  65.911  50.545
ATOM   5904 HG22 ILE   378      74.011  65.518  49.356
ATOM   5905 HG23 ILE   378      74.314  64.469  50.698
ATOM   5906  CG1 ILE   378      76.495  65.141  48.148
ATOM   5907 HG12 ILE   378      77.112  65.808  48.748
ATOM   5908 HG13 ILE   378      77.207  64.582  47.541
ATOM   5909  CD1 ILE   378      75.654  65.985  47.181
ATOM   5910 HD11 ILE   378      76.286  66.714  46.675
ATOM   5911 HD12 ILE   378      75.271  65.152  46.591
ATOM   5912 HD13 ILE   378      74.903  66.462  47.813
ATOM   5913  C   ILE   378      75.845  62.471  50.902
ATOM   5914  O   ILE   378      74.886  61.923  50.322
ATOM   5915  N   PRO   379      76.295  61.974  52.093
ATOM   5916  CD  PRO   379      77.549  62.162  52.793
ATOM   5917  HD2 PRO   379      77.834  63.186  53.035
ATOM   5918  HD3 PRO   379      78.338  61.676  52.220
ATOM   5919  CG  PRO   379      77.453  61.413  54.099
ATOM   5920  HG2 PRO   379      76.940  62.028  54.839
ATOM   5921  HG3 PRO   379      78.399  61.064  54.512
ATOM   5922  CB  PRO   379      76.519  60.201  53.750
ATOM   5923  HB2 PRO   379      75.949  59.904  54.630
ATOM   5924  HB3 PRO   379      76.926  59.302  53.286
ATOM   5925  CA  PRO   379      75.541  60.906  52.767
ATOM   5926  HA  PRO   379      75.141  60.177  52.063
ATOM   5927  C   PRO   379      74.295  61.400  53.508
ATOM   5928  O   PRO   379      73.440  60.579  53.793
ATOM   5929  N   ASP   380      74.210  62.688  53.956
ATOM   5930  H   ASP   380      75.043  63.243  53.813
ATOM   5931  CA  ASP   380      73.033  63.301  54.599
ATOM   5932  HA  ASP   380      72.345  62.493  54.845
ATOM   5933  CB  ASP   380      73.538  63.915  55.901
ATOM   5934  HB2 ASP   380      74.145  63.271  56.539
ATOM   5935  HB3 ASP   380      74.173  64.778  55.706
ATOM   5936  CG  ASP   380      72.424  64.523  56.704
ATOM   5937  OD1 ASP   380      71.538  63.808  57.207
ATOM   5938  OD2 ASP   380      72.398  65.754  56.773
ATOM   5939  C   ASP   380      72.345  64.344  53.647
ATOM   5940  O   ASP   380      73.166  65.191  53.168
ATOM   5941  N   PHE   381      71.052  64.373  53.463
ATOM   5942  H   PHE   381      70.551  63.661  53.974
ATOM   5943  CA  PHE   381      70.248  65.270  52.617
ATOM   5944  HA  PHE   381      70.467  66.294  52.923
ATOM   5945  CB  PHE   381      70.552  65.129  51.149
ATOM   5946  HB2 PHE   381      69.926  65.878  50.663
ATOM   5947  HB3 PHE   381      71.570  65.473  50.971
ATOM   5948  CG  PHE   381      70.284  63.805  50.536
ATOM   5949  CD1 PHE   381      69.048  63.415  50.155
ATOM   5950  HD1 PHE   381      68.210  64.070  50.347
ATOM   5951  CE1 PHE   381      68.814  62.147  49.638
ATOM   5952  HE1 PHE   381      67.840  61.909  49.234
ATOM   5953  CZ  PHE   381      69.845  61.209  49.564
ATOM   5954  HZ  PHE   381      69.614  60.190  49.289
ATOM   5955  CE2 PHE   381      71.154  61.604  49.898
ATOM   5956  HE2 PHE   381      71.954  60.881  49.834
ATOM   5957  CD2 PHE   381      71.381  62.889  50.372
ATOM   5958  HD2 PHE   381      72.379  63.142  50.702
ATOM   5959  C   PHE   381      68.746  65.214  52.914
ATOM   5960  O   PHE   381      68.188  64.166  53.271
ATOM   5961  N   SER   382      68.013  66.280  52.695
ATOM   5962  H   SER   382      68.399  67.150  52.357
ATOM   5963  CA  SER   382      66.579  66.365  53.071
ATOM   5964  HA  SER   382      66.156  65.366  52.972
ATOM   5965  CB  SER   382      66.336  66.930  54.522
ATOM   5966  HB2 SER   382      66.862  67.875  54.655
ATOM   5967  HB3 SER   382      65.280  67.055  54.760
ATOM   5968  OG  SER   382      66.972  66.205  55.577
ATOM   5969  HG  SER   382      67.899  66.453  55.548
ATOM   5970  C   SER   382      65.913  67.243  51.997
ATOM   5971  O   SER   382      66.581  68.032  51.366
ATOM   5972  N   ILE   383      64.600  67.128  51.752
ATOM   5973  H   ILE   383      64.063  66.514  52.347
ATOM   5974  CA  ILE   383      63.856  67.969  50.835
ATOM   5975  HA  ILE   383      64.392  67.983  49.886
ATOM   5976  CB  ILE   383      62.369  67.356  50.633
ATOM   5977  HB  ILE   383      61.994  67.131  51.631
ATOM   5978  CG2 ILE   383      61.391  68.349  50.068
ATOM   5979 HG21 ILE   383      61.267  69.245  50.677
ATOM   5980 HG22 ILE   383      61.737  68.657  49.082
ATOM   5981 HG23 ILE   383      60.414  67.868  50.029
ATOM   5982  CG1 ILE   383      62.423  66.104  49.700
ATOM   5983 HG12 ILE   383      62.287  66.324  48.641
ATOM   5984 HG13 ILE   383      63.419  65.675  49.804
ATOM   5985  CD1 ILE   383      61.443  64.963  49.978
ATOM   5986 HD11 ILE   383      61.692  64.181  49.261
ATOM   5987 HD12 ILE   383      61.315  64.536  50.972
ATOM   5988 HD13 ILE   383      60.446  65.336  49.748
ATOM   5989  C   ILE   383      63.814  69.347  51.441
ATOM   5990  O   ILE   383      63.604  69.490  52.655
ATOM   5991  N   ALA   384      63.957  70.353  50.615
ATOM   5992  H   ALA   384      63.983  70.181  49.621
ATOM   5993  CA  ALA   384      64.063  71.810  50.998
ATOM   5994  HA  ALA   384      65.002  71.942  51.535
ATOM   5995  CB  ALA   384      64.248  72.642  49.678
ATOM   5996  HB1 ALA   384      64.482  73.661  49.988
ATOM   5997  HB2 ALA   384      65.051  72.191  49.095
ATOM   5998  HB3 ALA   384      63.362  72.568  49.047
ATOM   5999  C   ALA   384      62.882  72.197  51.911
ATOM   6000  O   ALA   384      61.742  71.865  51.595
ATOM   6001  N   PRO   385      63.124  73.055  52.907
ATOM   6002  CD  PRO   385      64.426  73.588  53.262
ATOM   6003  HD2 PRO   385      64.897  74.229  52.517
ATOM   6004  HD3 PRO   385      65.171  72.817  53.459
ATOM   6005  CG  PRO   385      64.205  74.502  54.449
ATOM   6006  HG2 PRO   385      64.250  75.488  53.988
ATOM   6007  HG3 PRO   385      64.990  74.396  55.198
ATOM   6008  CB  PRO   385      62.846  74.156  54.977
ATOM   6009  HB2 PRO   385      62.362  75.064  55.336
ATOM   6010  HB3 PRO   385      62.981  73.404  55.755
ATOM   6011  CA  PRO   385      62.100  73.512  53.812
ATOM   6012  HA  PRO   385      61.521  72.650  54.144
ATOM   6013  C   PRO   385      61.081  74.414  53.126
ATOM   6014  O   PRO   385      61.375  75.280  52.379
ATOM   6015  N   GLY   386      59.792  74.201  53.536
ATOM   6016  H   GLY   386      59.561  73.410  54.119
ATOM   6017  CA  GLY   386      58.632  74.843  52.952
ATOM   6018  HA2 GLY   386      57.842  74.744  53.696
ATOM   6019  HA3 GLY   386      58.636  75.923  52.808
ATOM   6020  C   GLY   386      58.191  74.300  51.540
ATOM   6021  O   GLY   386      57.104  74.674  51.119
ATOM   6022  N   ALA   387      59.019  73.491  50.861
ATOM   6023  H   ALA   387      59.903  73.395  51.339
ATOM   6024  CA  ALA   387      58.707  72.659  49.645
ATOM   6025  HA  ALA   387      58.269  73.269  48.856
ATOM   6026  CB  ALA   387      59.966  72.163  49.015
ATOM   6027  HB1 ALA   387      60.431  71.360  49.587
ATOM   6028  HB2 ALA   387      59.662  71.666  48.094
ATOM   6029  HB3 ALA   387      60.645  72.998  48.845
ATOM   6030  C   ALA   387      57.737  71.530  49.991
ATOM   6031  O   ALA   387      57.898  70.859  51.014
ATOM   6032  N   GLN   388      57.055  70.986  48.956
ATOM   6033  H   GLN   388      56.907  71.484  48.089
ATOM   6034  CA  GLN   388      56.491  69.659  48.995
ATOM   6035  HA  GLN   388      57.056  69.027  49.680
ATOM   6036  CB  GLN   388      55.016  69.725  49.455
ATOM   6037  HB2 GLN   388      54.512  68.763  49.363
ATOM   6038  HB3 GLN   388      54.747  70.136  50.427
ATOM   6039  CG  GLN   388      54.230  70.674  48.534
ATOM   6040  HG2 GLN   388      54.629  71.686  48.467
ATOM   6041  HG3 GLN   388      54.146  70.195  47.559
ATOM   6042  CD  GLN   388      52.842  70.975  49.133
ATOM   6043  OE1 GLN   388      52.714  71.647  50.187
ATOM   6044  NE2 GLN   388      51.751  70.454  48.534
ATOM   6045 HE21 GLN   388      50.880  70.943  48.681
ATOM   6046 HE22 GLN   388      51.896  69.803  47.774
ATOM   6047  C   GLN   388      56.537  68.997  47.628
ATOM   6048  O   GLN   388      56.677  69.664  46.600
ATOM   6049  N   ILE   389      56.505  67.683  47.631
ATOM   6050  H   ILE   389      56.292  67.200  48.491
ATOM   6051  CA  ILE   389      56.628  66.822  46.473
ATOM   6052  HA  ILE   389      57.000  67.331  45.584
ATOM   6053  CB  ILE   389      57.466  65.533  46.808
ATOM   6054  HB  ILE   389      56.899  64.991  47.564
ATOM   6055  CG2 ILE   389      57.628  64.628  45.570
ATOM   6056 HG21 ILE   389      56.645  64.196  45.380
ATOM   6057 HG22 ILE   389      57.958  65.100  44.645
ATOM   6058 HG23 ILE   389      58.451  63.934  45.738
ATOM   6059  CG1 ILE   389      58.889  65.843  47.408
ATOM   6060 HG12 ILE   389      58.720  66.269  48.396
ATOM   6061 HG13 ILE   389      59.504  64.943  47.417
ATOM   6062  CD1 ILE   389      59.685  66.959  46.698
ATOM   6063 HD11 ILE   389      59.955  66.644  45.691
ATOM   6064 HD12 ILE   389      59.143  67.904  46.665
ATOM   6065 HD13 ILE   389      60.566  67.141  47.314
ATOM   6066  C   ILE   389      55.170  66.375  46.013
ATOM   6067  O   ILE   389      54.269  66.008  46.790
ATOM   6068  N   GLN   390      55.002  66.262  44.739
ATOM   6069  H   GLN   390      55.845  66.385  44.197
ATOM   6070  CA  GLN   390      53.867  65.890  43.938
ATOM   6071  HA  GLN   390      53.122  65.450  44.601
ATOM   6072  CB  GLN   390      53.184  67.170  43.376
ATOM   6073  HB2 GLN   390      52.897  67.883  44.149
ATOM   6074  HB3 GLN   390      53.869  67.612  42.652
ATOM   6075  CG  GLN   390      51.945  66.840  42.565
ATOM   6076  HG2 GLN   390      52.221  66.586  41.542
ATOM   6077  HG3 GLN   390      51.357  66.024  42.983
ATOM   6078  CD  GLN   390      51.090  68.039  42.342
ATOM   6079  OE1 GLN   390      51.287  68.815  41.455
ATOM   6080  NE2 GLN   390      50.034  68.201  43.058
ATOM   6081 HE21 GLN   390      49.437  68.928  42.691
ATOM   6082 HE22 GLN   390      49.994  67.672  43.917
ATOM   6083  C   GLN   390      54.313  64.893  42.849
ATOM   6084  O   GLN   390      55.078  65.204  41.912
ATOM   6085  N   HIE   391      53.997  63.636  43.039
ATOM   6086  H   HIE   391      53.518  63.431  43.904
ATOM   6087  CA  HIE   391      54.232  62.512  42.113
ATOM   6088  HA  HIE   391      55.253  62.387  41.749
ATOM   6089  CB  HIE   391      54.051  61.307  42.951
ATOM   6090  HB2 HIE   391      53.079  61.385  43.434
ATOM   6091  HB3 HIE   391      54.015  60.418  42.320
ATOM   6092  CG  HIE   391      55.029  61.094  44.141
ATOM   6093  ND1 HIE   391      56.378  60.730  43.985
ATOM   6094  CE1 HIE   391      56.939  60.910  45.235
ATOM   6095  HE1 HIE   391      58.005  60.798  45.363
ATOM   6096  NE2 HIE   391      56.021  61.318  46.123
ATOM   6097  HE2 HIE   391      56.218  61.750  47.013
ATOM   6098  CD2 HIE   391      54.899  61.621  45.403
ATOM   6099  HD2 HIE   391      53.995  62.078  45.780
ATOM   6100  C   HIE   391      53.294  62.661  40.885
ATOM   6101  O   HIE   391      52.181  63.242  40.994
ATOM   6102  N   LYS   392      53.687  62.146  39.755
ATOM   6103  H   LYS   392      54.625  61.777  39.819
ATOM   6104  CA  LYS   392      53.013  62.260  38.495
ATOM   6105  HA  LYS   392      52.062  62.710  38.775
ATOM   6106  CB  LYS   392      53.778  63.156  37.592
ATOM   6107  HB2 LYS   392      54.769  62.753  37.384
ATOM   6108  HB3 LYS   392      53.242  63.214  36.644
ATOM   6109  CG  LYS   392      54.074  64.555  38.175
ATOM   6110  HG2 LYS   392      54.811  64.473  38.975
ATOM   6111  HG3 LYS   392      54.655  65.121  37.448
ATOM   6112  CD  LYS   392      52.876  65.409  38.674
ATOM   6113  HD2 LYS   392      52.311  64.818  39.395
ATOM   6114  HD3 LYS   392      53.144  66.351  39.152
ATOM   6115  CE  LYS   392      51.936  65.775  37.594
ATOM   6116  HE2 LYS   392      51.577  64.864  37.116
ATOM   6117  HE3 LYS   392      51.025  66.233  37.979
ATOM   6118  NZ  LYS   392      52.642  66.716  36.620
ATOM   6119  HZ1 LYS   392      52.966  66.134  35.862
ATOM   6120  HZ2 LYS   392      52.059  67.380  36.133
ATOM   6121  HZ3 LYS   392      53.513  67.064  36.996
ATOM   6122  C   LYS   392      52.810  60.859  37.846
ATOM   6123  O   LYS   392      53.455  60.390  36.962
ATOM   6124  N   SER   393      51.848  60.165  38.434
ATOM   6125  H   SER   393      51.349  60.603  39.194
ATOM   6126  CA  SER   393      51.277  58.854  37.952
ATOM   6127  HA  SER   393      52.010  58.048  37.949
ATOM   6128  CB  SER   393      50.049  58.613  38.854
ATOM   6129  HB2 SER   393      50.326  58.672  39.906
ATOM   6130  HB3 SER   393      49.322  59.414  38.721
ATOM   6131  OG  SER   393      49.530  57.373  38.495
ATOM   6132  HG  SER   393      48.834  57.536  37.854
ATOM   6133  C   SER   393      50.839  58.909  36.446
ATOM   6134  O   SER   393      50.582  59.956  35.899
ATOM   6135  N   GLY   394      50.778  57.704  35.852
ATOM   6136  H   GLY   394      51.059  56.891  36.382
ATOM   6137  CA  GLY   394      50.441  57.490  34.402
ATOM   6138  HA2 GLY   394      49.373  57.670  34.276
ATOM   6139  HA3 GLY   394      50.953  58.307  33.893
ATOM   6140  C   GLY   394      50.964  56.164  33.976
ATOM   6141  O   GLY   394      51.246  55.348  34.805
ATOM   6142  N   ILE   395      50.862  55.846  32.674
ATOM   6143  H   ILE   395      50.605  56.652  32.121
ATOM   6144  CA  ILE   395      51.231  54.550  32.118
ATOM   6145  HA  ILE   395      50.691  53.692  32.519
ATOM   6146  CB  ILE   395      50.996  54.523  30.601
ATOM   6147  HB  ILE   395      51.396  53.629  30.122
ATOM   6148  CG2 ILE   395      49.433  54.604  30.344
ATOM   6149 HG21 ILE   395      49.292  54.456  29.274
ATOM   6150 HG22 ILE   395      48.876  53.877  30.933
ATOM   6151 HG23 ILE   395      49.014  55.585  30.571
ATOM   6152  CG1 ILE   395      51.663  55.692  29.882
ATOM   6153 HG12 ILE   395      51.343  56.574  30.437
ATOM   6154 HG13 ILE   395      52.727  55.467  29.953
ATOM   6155  CD1 ILE   395      51.303  55.954  28.458
ATOM   6156 HD11 ILE   395      51.385  55.046  27.859
ATOM   6157 HD12 ILE   395      50.301  56.380  28.406
ATOM   6158 HD13 ILE   395      51.991  56.670  28.012
ATOM   6159  C   ILE   395      52.666  54.217  32.483
ATOM   6160  O   ILE   395      52.998  53.038  32.734
ATOM   6161  N   VAL   396      53.565  55.192  32.396
ATOM   6162  H   VAL   396      53.289  56.126  32.131
ATOM   6163  CA  VAL   396      54.863  55.186  33.153
ATOM   6164  HA  VAL   396      54.941  54.358  33.859
ATOM   6165  CB  VAL   396      56.060  55.207  32.204
ATOM   6166  HB  VAL   396      56.111  56.077  31.550
ATOM   6167  CG1 VAL   396      57.371  55.330  33.031
ATOM   6168 HG11 VAL   396      57.541  54.416  33.599
ATOM   6169 HG12 VAL   396      58.199  55.363  32.323
ATOM   6170 HG13 VAL   396      57.417  56.148  33.750
ATOM   6171  CG2 VAL   396      56.238  53.936  31.320
ATOM   6172 HG21 VAL   396      55.359  53.759  30.701
ATOM   6173 HG22 VAL   396      57.084  54.039  30.640
ATOM   6174 HG23 VAL   396      56.368  53.151  32.064
ATOM   6175  C   VAL   396      54.842  56.503  33.991
ATOM   6176  O   VAL   396      54.651  57.635  33.519
ATOM   6177  N   SER   397      55.210  56.444  35.260
ATOM   6178  H   SER   397      55.503  55.538  35.596
ATOM   6179  CA  SER   397      54.969  57.589  36.158
ATOM   6180  HA  SER   397      54.226  58.324  35.847
ATOM   6181  CB  SER   397      54.586  56.836  37.458
ATOM   6182  HB2 SER   397      55.477  56.394  37.906
ATOM   6183  HB3 SER   397      54.192  57.467  38.255
ATOM   6184  OG  SER   397      53.583  55.927  37.249
ATOM   6185  HG  SER   397      53.885  55.056  36.980
ATOM   6186  C   SER   397      56.209  58.467  36.402
ATOM   6187  O   SER   397      57.296  58.003  36.268
ATOM   6188  N   GLY   398      56.016  59.736  36.746
ATOM   6189  H   GLY   398      55.069  60.057  36.604
ATOM   6190  CA  GLY   398      57.178  60.652  37.068
ATOM   6191  HA2 GLY   398      58.181  60.231  37.129
ATOM   6192  HA3 GLY   398      57.189  61.295  36.188
ATOM   6193  C   GLY   398      57.015  61.503  38.392
ATOM   6194  O   GLY   398      56.104  61.185  39.159
ATOM   6195  N   VAL   399      57.884  62.509  38.585
ATOM   6196  H   VAL   399      58.575  62.675  37.867
ATOM   6197  CA  VAL   399      57.661  63.458  39.676
ATOM   6198  HA  VAL   399      56.635  63.392  40.037
ATOM   6199  CB  VAL   399      58.662  63.216  40.864
ATOM   6200  HB  VAL   399      58.506  62.151  41.042
ATOM   6201  CG1 VAL   399      60.121  63.478  40.461
ATOM   6202 HG11 VAL   399      60.749  63.073  41.255
ATOM   6203 HG12 VAL   399      60.404  62.960  39.545
ATOM   6204 HG13 VAL   399      60.268  64.552  40.350
ATOM   6205  CG2 VAL   399      58.213  63.899  42.187
ATOM   6206 HG21 VAL   399      57.171  63.758  42.476
ATOM   6207 HG22 VAL   399      58.786  63.442  42.994
ATOM   6208 HG23 VAL   399      58.325  64.980  42.102
ATOM   6209  C   VAL   399      57.922  64.897  39.164
ATOM   6210  O   VAL   399      58.643  65.147  38.204
ATOM   6211  N   GLN   400      57.189  65.812  39.809
ATOM   6212  H   GLN   400      56.529  65.478  40.495
ATOM   6213  CA  GLN   400      57.115  67.190  39.302
ATOM   6214  HA  GLN   400      56.756  67.167  38.273
ATOM   6215  CB  GLN   400      56.122  67.923  40.179
ATOM   6216  HB2 GLN   400      55.252  67.291  40.361
ATOM   6217  HB3 GLN   400      56.662  68.115  41.106
ATOM   6218  CG  GLN   400      55.642  69.244  39.687
ATOM   6219  HG2 GLN   400      54.901  69.672  40.362
ATOM   6220  HG3 GLN   400      56.412  70.009  39.585
ATOM   6221  CD  GLN   400      55.026  69.225  38.326
ATOM   6222  OE1 GLN   400      54.249  68.381  37.997
ATOM   6223  NE2 GLN   400      55.247  70.175  37.453
ATOM   6224 HE21 GLN   400      54.830  70.252  36.536
ATOM   6225 HE22 GLN   400      55.854  70.917  37.770
ATOM   6226  C   GLN   400      58.529  67.867  39.354
ATOM   6227  O   GLN   400      58.840  68.602  38.412
ATOM   6228  N   ALA   401      59.398  67.541  40.312
ATOM   6229  H   ALA   401      59.140  66.860  41.012
ATOM   6230  CA  ALA   401      60.609  68.162  40.726
ATOM   6231  HA  ALA   401      61.402  68.101  39.980
ATOM   6232  CB  ALA   401      60.357  69.625  41.024
ATOM   6233  HB1 ALA   401      61.298  70.141  41.211
ATOM   6234  HB2 ALA   401      59.825  69.974  40.139
ATOM   6235  HB3 ALA   401      59.829  69.733  41.972
ATOM   6236  C   ALA   401      61.063  67.359  41.989
ATOM   6237  O   ALA   401      60.207  66.677  42.609
ATOM   6238  N   LEU   402      62.278  67.548  42.475
ATOM   6239  H   LEU   402      62.868  68.217  42.002
ATOM   6240  CA  LEU   402      62.745  67.067  43.760
ATOM   6241  HA  LEU   402      61.916  67.021  44.466
ATOM   6242  CB  LEU   402      63.217  65.624  43.687
ATOM   6243  HB2 LEU   402      62.405  64.926  43.481
ATOM   6244  HB3 LEU   402      63.942  65.509  42.881
ATOM   6245  CG  LEU   402      63.850  65.084  44.992
ATOM   6246  HG  LEU   402      64.759  65.658  45.171
ATOM   6247  CD1 LEU   402      62.866  65.179  46.212
ATOM   6248 HD11 LEU   402      62.029  64.525  45.965
ATOM   6249 HD12 LEU   402      63.320  64.748  47.104
ATOM   6250 HD13 LEU   402      62.724  66.256  46.307
ATOM   6251  CD2 LEU   402      64.395  63.671  44.860
ATOM   6252 HD21 LEU   402      65.017  63.453  43.992
ATOM   6253 HD22 LEU   402      65.039  63.452  45.712
ATOM   6254 HD23 LEU   402      63.552  62.990  44.741
ATOM   6255  C   LEU   402      63.815  68.010  44.293
ATOM   6256  O   LEU   402      65.019  67.774  44.261
ATOM   6257  N   PRO   403      63.402  69.137  44.911
ATOM   6258  CD  PRO   403      61.966  69.484  45.025
ATOM   6259  HD2 PRO   403      61.407  68.726  45.574
ATOM   6260  HD3 PRO   403      61.550  69.558  44.020
ATOM   6261  CG  PRO   403      61.982  70.803  45.771
ATOM   6262  HG2 PRO   403      61.864  70.580  46.831
ATOM   6263  HG3 PRO   403      61.196  71.446  45.375
ATOM   6264  CB  PRO   403      63.354  71.387  45.544
ATOM   6265  HB2 PRO   403      63.683  72.120  46.281
ATOM   6266  HB3 PRO   403      63.410  71.878  44.573
ATOM   6267  CA  PRO   403      64.220  70.170  45.546
ATOM   6268  HA  PRO   403      65.096  70.497  44.985
ATOM   6269  C   PRO   403      64.804  69.714  46.874
ATOM   6270  O   PRO   403      64.123  69.774  47.910
ATOM   6271  N   LEU   404      66.068  69.307  46.892
ATOM   6272  H   LEU   404      66.507  69.451  45.994
ATOM   6273  CA  LEU   404      66.832  68.907  48.108
ATOM   6274  HA  LEU   404      66.173  68.461  48.853
ATOM   6275  CB  LEU   404      67.714  67.705  47.642
ATOM   6276  HB2 LEU   404      68.444  68.153  46.968
ATOM   6277  HB3 LEU   404      68.234  67.408  48.553
ATOM   6278  CG  LEU   404      67.101  66.383  47.080
ATOM   6279  HG  LEU   404      66.617  66.444  46.105
ATOM   6280  CD1 LEU   404      68.200  65.335  46.823
ATOM   6281 HD11 LEU   404      68.336  64.802  47.765
ATOM   6282 HD12 LEU   404      67.771  64.626  46.115
ATOM   6283 HD13 LEU   404      69.078  65.814  46.389
ATOM   6284  CD2 LEU   404      65.972  65.780  47.952
ATOM   6285 HD21 LEU   404      65.785  64.716  47.807
ATOM   6286 HD22 LEU   404      66.246  65.856  49.004
ATOM   6287 HD23 LEU   404      65.043  66.308  47.735
ATOM   6288  C   LEU   404      67.752  69.976  48.739
ATOM   6289  O   LEU   404      68.262  70.774  48.016
ATOM   6290  N   VAL   405      68.024  69.857  50.052
ATOM   6291  H   VAL   405      67.458  69.231  50.607
ATOM   6292  CA  VAL   405      69.039  70.620  50.871
ATOM   6293  HA  VAL   405      69.713  71.070  50.142
ATOM   6294  CB  VAL   405      68.410  71.723  51.685
ATOM   6295  HB  VAL   405      69.241  72.338  52.031
ATOM   6296  CG1 VAL   405      67.520  72.581  50.855
ATOM   6297 HG11 VAL   405      68.141  73.206  50.212
ATOM   6298 HG12 VAL   405      66.837  72.044  50.196
ATOM   6299 HG13 VAL   405      66.873  73.132  51.538
ATOM   6300  CG2 VAL   405      67.767  71.161  52.988
ATOM   6301 HG21 VAL   405      68.495  70.727  53.674
ATOM   6302 HG22 VAL   405      67.290  71.990  53.511
ATOM   6303 HG23 VAL   405      67.013  70.419  52.727
ATOM   6304  C   VAL   405      69.888  69.771  51.775
ATOM   6305  O   VAL   405      69.556  68.602  52.072
ATOM   6306  N   TRP   406      71.068  70.362  52.176
ATOM   6307  H   TRP   406      71.204  71.360  52.107
ATOM   6308  CA  TRP   406      72.061  69.732  53.067
ATOM   6309  HA  TRP   406      71.556  69.230  53.893
ATOM   6310  CB  TRP   406      72.834  68.591  52.373
ATOM   6311  HB2 TRP   406      73.521  68.149  53.095
ATOM   6312  HB3 TRP   406      72.090  67.861  52.055
ATOM   6313  CG  TRP   406      73.652  68.990  51.197
ATOM   6314  CD1 TRP   406      74.951  69.402  51.186
ATOM   6315  HD1 TRP   406      75.575  69.515  52.060
ATOM   6316  NE1 TRP   406      75.316  69.638  49.952
ATOM   6317  HE1 TRP   406      76.170  70.095  49.664
ATOM   6318  CE2 TRP   406      74.364  69.313  49.016
ATOM   6319  CZ2 TRP   406      74.285  69.461  47.643
ATOM   6320  HZ2 TRP   406      75.099  69.942  47.121
ATOM   6321  CH2 TRP   406      73.071  69.019  47.031
ATOM   6322  HH2 TRP   406      73.035  69.151  45.959
ATOM   6323  CZ3 TRP   406      71.983  68.591  47.810
ATOM   6324  HZ3 TRP   406      71.001  68.467  47.377
ATOM   6325  CE3 TRP   406      72.074  68.505  49.162
ATOM   6326  HE3 TRP   406      71.189  68.237  49.720
ATOM   6327  CD2 TRP   406      73.258  68.845  49.805
ATOM   6328  C   TRP   406      73.016  70.781  53.631
ATOM   6329  O   TRP   406      73.309  71.732  52.877
ATOM   6330  N   ASP   407      73.475  70.643  54.891
ATOM   6331  H   ASP   407      73.022  70.039  55.560
ATOM   6332  CA  ASP   407      74.686  71.322  55.265
ATOM   6333  HA  ASP   407      74.627  72.397  55.092
ATOM   6334  CB  ASP   407      74.960  71.022  56.730
ATOM   6335  HB2 ASP   407      74.068  71.233  57.321
ATOM   6336  HB3 ASP   407      75.173  69.958  56.834
ATOM   6337  CG  ASP   407      76.201  71.664  57.267
ATOM   6338  OD1 ASP   407      76.892  72.423  56.477
ATOM   6339  OD2 ASP   407      76.543  71.391  58.419
ATOM   6340  C   ASP   407      75.861  70.909  54.361
ATOM   6341  O   ASP   407      76.264  69.718  54.358
ATOM   6342  N   PRO   408      76.548  71.783  53.597
ATOM   6343  CD  PRO   408      76.223  73.160  53.385
ATOM   6344  HD2 PRO   408      75.973  73.701  54.297
ATOM   6345  HD3 PRO   408      75.302  73.198  52.804
ATOM   6346  CG  PRO   408      77.406  73.794  52.612
ATOM   6347  HG2 PRO   408      78.146  74.098  53.353
ATOM   6348  HG3 PRO   408      77.098  74.700  52.089
ATOM   6349  CB  PRO   408      77.887  72.619  51.705
ATOM   6350  HB2 PRO   408      78.921  72.805  51.415
ATOM   6351  HB3 PRO   408      77.279  72.529  50.805
ATOM   6352  CA  PRO   408      77.539  71.368  52.603
ATOM   6353  HA  PRO   408      77.091  70.601  51.970
ATOM   6354  C   PRO   408      78.893  70.893  53.238
ATOM   6355  O   PRO   408      79.518  69.963  52.656
ATOM   6356  N   ALA   409      79.321  71.410  54.420
ATOM   6357  H   ALA   409      78.820  72.194  54.813
ATOM   6358  CA  ALA   409      80.490  70.928  55.126
ATOM   6359  HA  ALA   409      81.337  70.972  54.441
ATOM   6360  CB  ALA   409      80.704  71.939  56.305
ATOM   6361  HB1 ALA   409      80.807  72.911  55.822
ATOM   6362  HB2 ALA   409      79.799  72.124  56.882
ATOM   6363  HB3 ALA   409      81.645  71.822  56.844
ATOM   6364  C   ALA   409      80.318  69.470  55.658
ATOM   6365  O   ALA   409      81.225  68.818  56.171
ATOM   6366  N   THR   410      79.189  68.872  55.473
ATOM   6367  H   THR   410      78.431  69.403  55.066
ATOM   6368  CA  THR   410      79.002  67.446  55.775
ATOM   6369  HA  THR   410      79.438  67.247  56.754
ATOM   6370  CB  THR   410      77.564  67.028  55.668
ATOM   6371  HB  THR   410      77.518  65.940  55.710
ATOM   6372  CG2 THR   410      76.698  67.595  56.797
ATOM   6373 HG21 THR   410      75.710  67.148  56.695
ATOM   6374 HG22 THR   410      77.182  67.304  57.731
ATOM   6375 HG23 THR   410      76.859  68.672  56.765
ATOM   6376  OG1 THR   410      77.096  67.355  54.392
ATOM   6377  HG1 THR   410      76.801  68.268  54.424
ATOM   6378  C   THR   410      79.810  66.567  54.855
ATOM   6379  O   THR   410      80.296  65.517  55.229
ATOM   6380  N   THR   411      80.038  67.091  53.576
ATOM   6381  H   THR   411      79.644  67.993  53.350
ATOM   6382  CA  THR   411      80.564  66.339  52.332
ATOM   6383  HA  THR   411      80.121  65.343  52.332
ATOM   6384  CB  THR   411      79.968  66.912  51.085
ATOM   6385  HB  THR   411      80.193  66.281  50.225
ATOM   6386  CG2 THR   411      78.423  66.963  51.235
ATOM   6387 HG21 THR   411      77.915  67.113  50.283
ATOM   6388 HG22 THR   411      78.057  65.982  51.538
ATOM   6389 HG23 THR   411      78.106  67.793  51.867
ATOM   6390  OG1 THR   411      80.477  68.153  50.876
ATOM   6391  HG1 THR   411      80.084  68.797  51.468
ATOM   6392  C   THR   411      82.087  66.233  52.283
ATOM   6393  O   THR   411      82.847  66.892  53.015
ATOM   6394  N   LYS   412      82.695  65.387  51.459
ATOM   6395  H   LYS   412      82.082  64.831  50.880
ATOM   6396  CA  LYS   412      84.129  65.291  51.149
ATOM   6397  HA  LYS   412      84.603  66.245  51.383
ATOM   6398  CB  LYS   412      84.822  64.124  51.862
ATOM   6399  HB2 LYS   412      85.897  64.081  51.686
ATOM   6400  HB3 LYS   412      84.684  64.397  52.908
ATOM   6401  CG  LYS   412      84.156  62.759  51.569
ATOM   6402  HG2 LYS   412      83.084  62.729  51.761
ATOM   6403  HG3 LYS   412      84.275  62.488  50.519
ATOM   6404  CD  LYS   412      84.762  61.705  52.512
ATOM   6405  HD2 LYS   412      85.848  61.764  52.436
ATOM   6406  HD3 LYS   412      84.447  61.931  53.531
ATOM   6407  CE  LYS   412      84.359  60.239  52.195
ATOM   6408  HE2 LYS   412      84.675  60.135  51.157
ATOM   6409  HE3 LYS   412      84.879  59.575  52.887
ATOM   6410  NZ  LYS   412      82.903  60.120  52.244
ATOM   6411  HZ1 LYS   412      82.509  60.430  53.121
ATOM   6412  HZ2 LYS   412      82.364  60.730  51.647
ATOM   6413  HZ3 LYS   412      82.533  59.181  52.288
ATOM   6414  C   LYS   412      84.340  65.181  49.644
ATOM   6415  O   LYS   412      83.612  64.454  48.983
ATOM   6416  N   ALA   413      85.467  65.700  49.136
ATOM   6417  H   ALA   413      86.167  66.186  49.680
ATOM   6418  CA  ALA   413      85.805  65.424  47.695
ATOM   6419  HA  ALA   413      84.920  65.623  47.088
ATOM   6420  CB  ALA   413      87.016  66.409  47.369
ATOM   6421  HB1 ALA   413      87.745  66.336  48.175
ATOM   6422  HB2 ALA   413      87.492  66.184  46.416
ATOM   6423  HB3 ALA   413      86.662  67.440  47.403
ATOM   6424  C   ALA   413      86.171  63.905  47.482
ATOM   6425  O   ALA   413      87.179  63.428  48.127
ATOM   6426  N   VAL   414      85.520  63.218  46.535
ATOM   6427  H   VAL   414      84.753  63.661  46.050
ATOM   6428  CA  VAL   414      85.823  61.894  46.120
ATOM   6429  HA  VAL   414      86.641  61.414  46.655
ATOM   6430  CB  VAL   414      84.645  61.014  46.240
ATOM   6431  HB  VAL   414      83.769  61.535  45.854
ATOM   6432  CG1 VAL   414      84.766  59.617  45.575
ATOM   6433 HG11 VAL   414      83.887  58.975  45.633
ATOM   6434 HG12 VAL   414      84.930  59.732  44.504
ATOM   6435 HG13 VAL   414      85.578  59.014  45.983
ATOM   6436  CG2 VAL   414      84.199  60.856  47.704
ATOM   6437 HG21 VAL   414      83.189  60.464  47.586
ATOM   6438 HG22 VAL   414      84.858  60.226  48.301
ATOM   6439 HG23 VAL   414      84.097  61.779  48.276
ATOM   6440  C   VAL   414      86.277  62.065  44.702
ATOM   6441  O   VAL   414      85.505  62.359  43.798
ATOM   6442  OXT VAL   414      87.493  61.806  44.449
TER   
ATOM   6443  K+   K+   415      50.831  46.840  16.316
TER   
ATOM   6444  O   WAT   416      61.939  34.494  34.507
ATOM   6445  H1  WAT   416      61.658  35.311  34.918
ATOM   6446  H2  WAT   416      61.359  33.828  34.875
ATOM   6447  O   WAT   417      47.279  59.912  27.827
ATOM   6448  H1  WAT   417      47.582  60.044  28.725
ATOM   6449  H2  WAT   417      47.954  59.370  27.421
ATOM   6450  O   WAT   418      60.144  33.088  19.616
ATOM   6451  H1  WAT   418      59.273  32.812  19.900
ATOM   6452  H2  WAT   418      60.159  34.032  19.774
ATOM   6453  O   WAT   419      72.691  34.441  35.560
ATOM   6454  H1  WAT   419      72.810  33.579  35.960
ATOM   6455  H2  WAT   419      71.745  34.520  35.439
ATOM   6456  O   WAT   420      61.106  36.931  34.402
ATOM   6457  H1  WAT   420      61.269  36.518  33.553
ATOM   6458  H2  WAT   420      60.805  37.813  34.184
ATOM   6459  O   WAT   421      48.465  34.907  30.181
ATOM   6460  H1  WAT   421      48.966  35.656  30.502
ATOM   6461  H2  WAT   421      48.813  34.745  29.304
ATOM   6462  O   WAT   422      77.061  44.974  21.508
ATOM   6463  H1  WAT   422      76.160  45.270  21.378
ATOM   6464  H2  WAT   422      76.978  44.180  22.035
ATOM   6465  O   WAT   423      46.020  48.668  21.378
ATOM   6466  H1  WAT   423      46.390  49.370  21.912
ATOM   6467  H2  WAT   423      45.401  48.225  21.958
ATOM   6468  O   WAT   424      74.073  52.487  28.499
ATOM   6469  H1  WAT   424      73.975  52.766  27.588
ATOM   6470  H2  WAT   424      73.386  52.959  28.971
ATOM   6471  O   WAT   425      69.953  55.853  30.421
ATOM   6472  H1  WAT   425      70.291  56.653  30.018
ATOM   6473  H2  WAT   425      69.058  55.779  30.090
ATOM   6474  O   WAT   426      70.265  53.742  31.954
ATOM   6475  H1  WAT   426      70.228  54.583  31.497
ATOM   6476  H2  WAT   426      71.178  53.660  32.229
ATOM   6477  O   WAT   427      56.229  54.867  43.922
ATOM   6478  H1  WAT   427      56.171  55.234  44.803
ATOM   6479  H2  WAT   427      56.490  55.606  43.372
ATOM   6480  O   WAT   428      52.808  39.746  26.836
ATOM   6481  H1  WAT   428      52.439  39.367  27.633
ATOM   6482  H2  WAT   428      53.264  40.532  27.134
ATOM   6483  O   WAT   429      53.947  41.216  21.556
ATOM   6484  H1  WAT   429      54.445  42.024  21.427
ATOM   6485  H2  WAT   429      54.251  40.881  22.400
ATOM   6486  O   WAT   430      72.030  43.230  26.945
ATOM   6487  H1  WAT   430      72.393  43.853  26.316
ATOM   6488  H2  WAT   430      71.465  42.662  26.421
ATOM   6489  O   WAT   431      50.516  38.891  28.919
ATOM   6490  H1  WAT   431      50.373  38.487  28.063
ATOM   6491  H2  WAT   431      50.450  38.164  29.540
ATOM   6492  O   WAT   432      68.463  35.204  36.494
ATOM   6493  H1  WAT   432      68.726  35.765  37.224
ATOM   6494  H2  WAT   432      67.670  34.766  36.802
ATOM   6495  O   WAT   433      47.431  48.066  18.912
ATOM   6496  H1  WAT   433      47.636  48.972  18.681
ATOM   6497  H2  WAT   433      47.217  48.100  19.845
ATOM   6498  O   WAT   434      49.313  51.270  29.807
ATOM   6499  H1  WAT   434      49.405  51.375  30.755
ATOM   6500  H2  WAT   434      49.951  50.595  29.578
ATOM   6501  O   WAT   435      60.897  36.757  40.199
ATOM   6502  H1  WAT   435      61.191  36.847  41.106
ATOM   6503  H2  WAT   435      60.010  36.405  40.270
ATOM   6504  O   WAT   436      70.985  38.594  41.303
ATOM   6505  H1  WAT   436      70.062  38.357  41.389
ATOM   6506  H2  WAT   436      71.153  39.170  42.050
ATOM   6507  O   WAT   437      65.929  31.991  32.091
ATOM   6508  H1  WAT   437      65.531  32.632  32.679
ATOM   6509  H2  WAT   437      65.791  32.352  31.215
ATOM   6510  O   WAT   438      76.734  44.444  39.641
ATOM   6511  H1  WAT   438      77.062  44.127  40.483
ATOM   6512  H2  WAT   438      77.106  45.322  39.554
ATOM   6513  O   WAT   439      68.621  29.587  30.214
ATOM   6514  H1  WAT   439      67.819  29.933  29.822
ATOM   6515  H2  WAT   439      69.121  30.365  30.461
ATOM   6516  O   WAT   440      60.929  66.491  31.232
ATOM   6517  H1  WAT   440      60.387  65.926  31.783
ATOM   6518  H2  WAT   440      61.829  66.253  31.458
ATOM   6519  O   WAT   441      57.576  32.447  20.611
ATOM   6520  H1  WAT   441      57.453  32.966  21.406
ATOM   6521  H2  WAT   441      56.695  32.154  20.377
ATOM   6522  O   WAT   442      76.202  41.835  33.503
ATOM   6523  H1  WAT   442      76.280  41.631  34.435
ATOM   6524  H2  WAT   442      75.469  42.448  33.453
TER   
END   
END   
